# Supplementary material for: Pd-mediated construction of a cyclopentane ring fused with indoles
Source: Royal Society of Chemistry journal article supplement (doi:10.1039/c3cc42309c), 2013-01-01
Supplement: c3cc42309c_2.pdf [file c3cc42309c_2.pdf]

# Copies of $^1\text{H}$ and $^{13}\text{C}$ NMR spectra

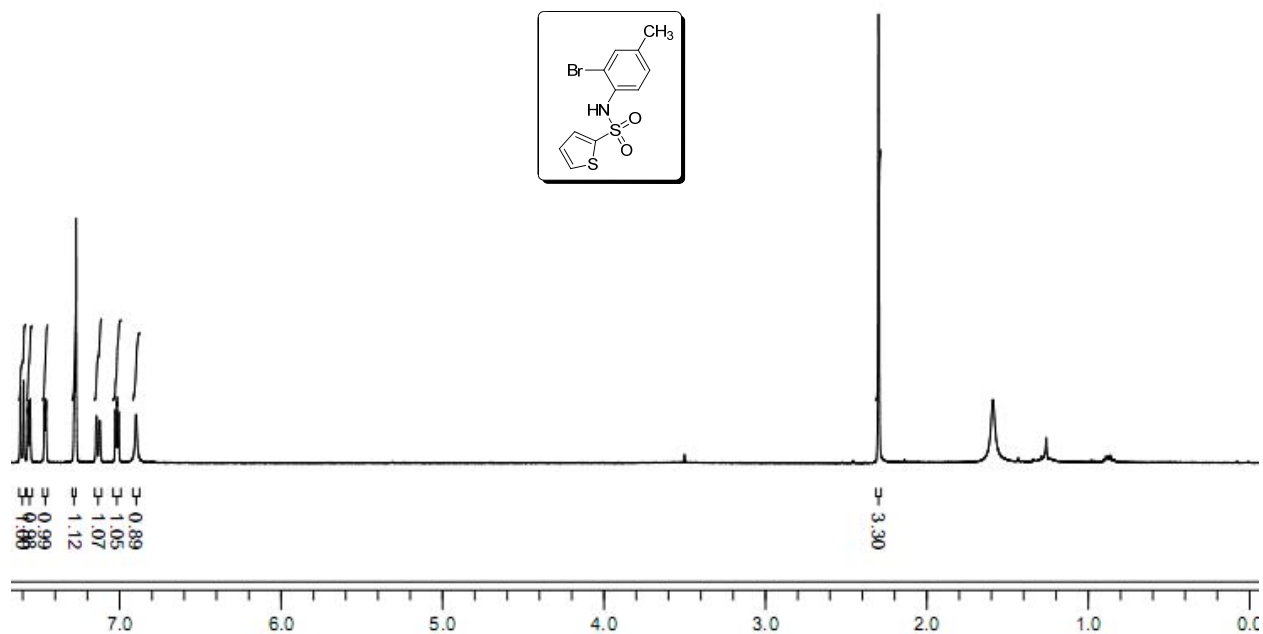

$^1\text{H}$  NMR (Varian, 400 MHz) spectrum of compound **1f** in  $\text{CDCl}_3$

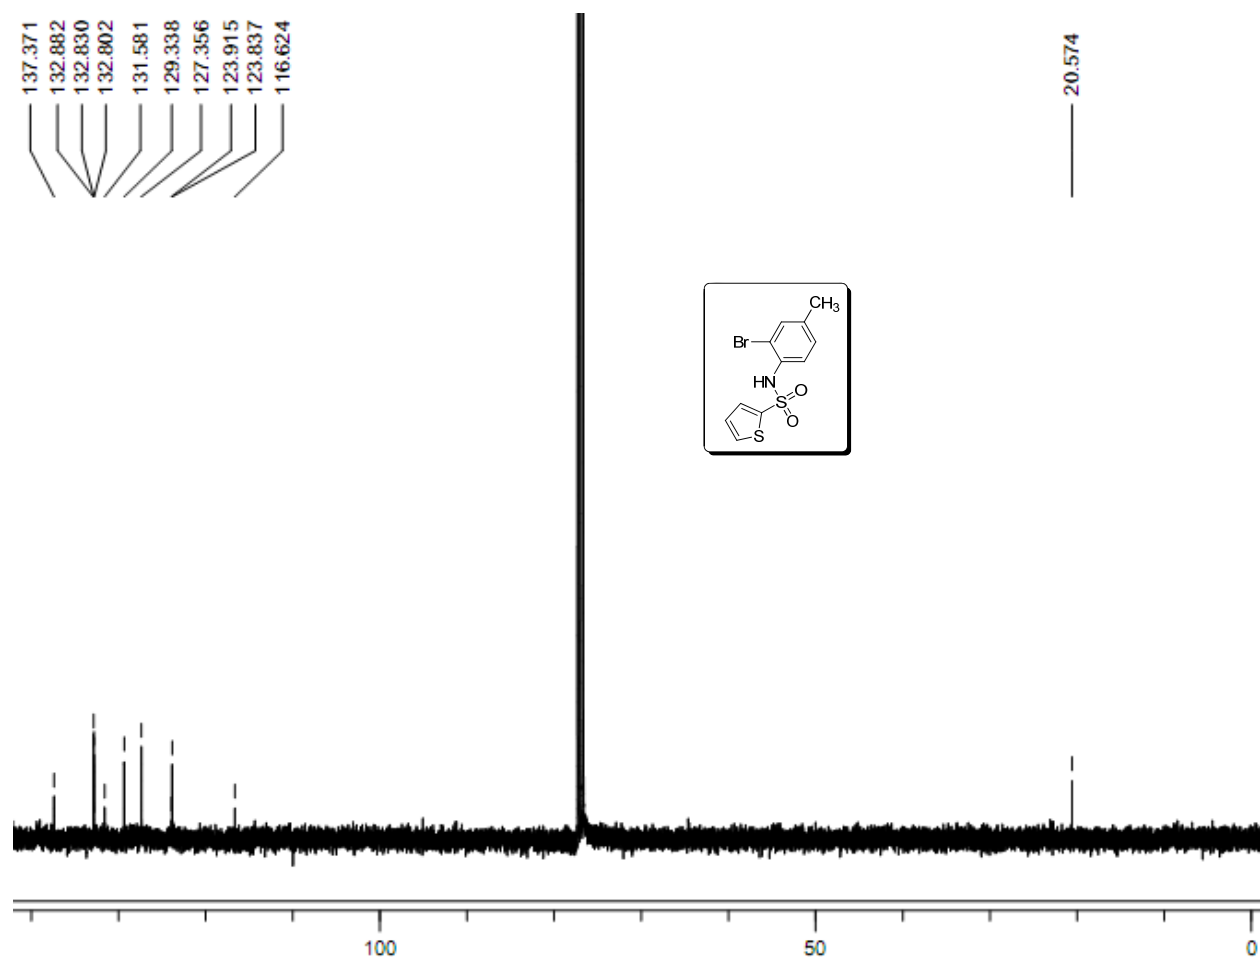

$^{13}\text{C}$  NMR spectrum (Varian, 100 MHz) of compound **1f** in  $\text{CDCl}_3$

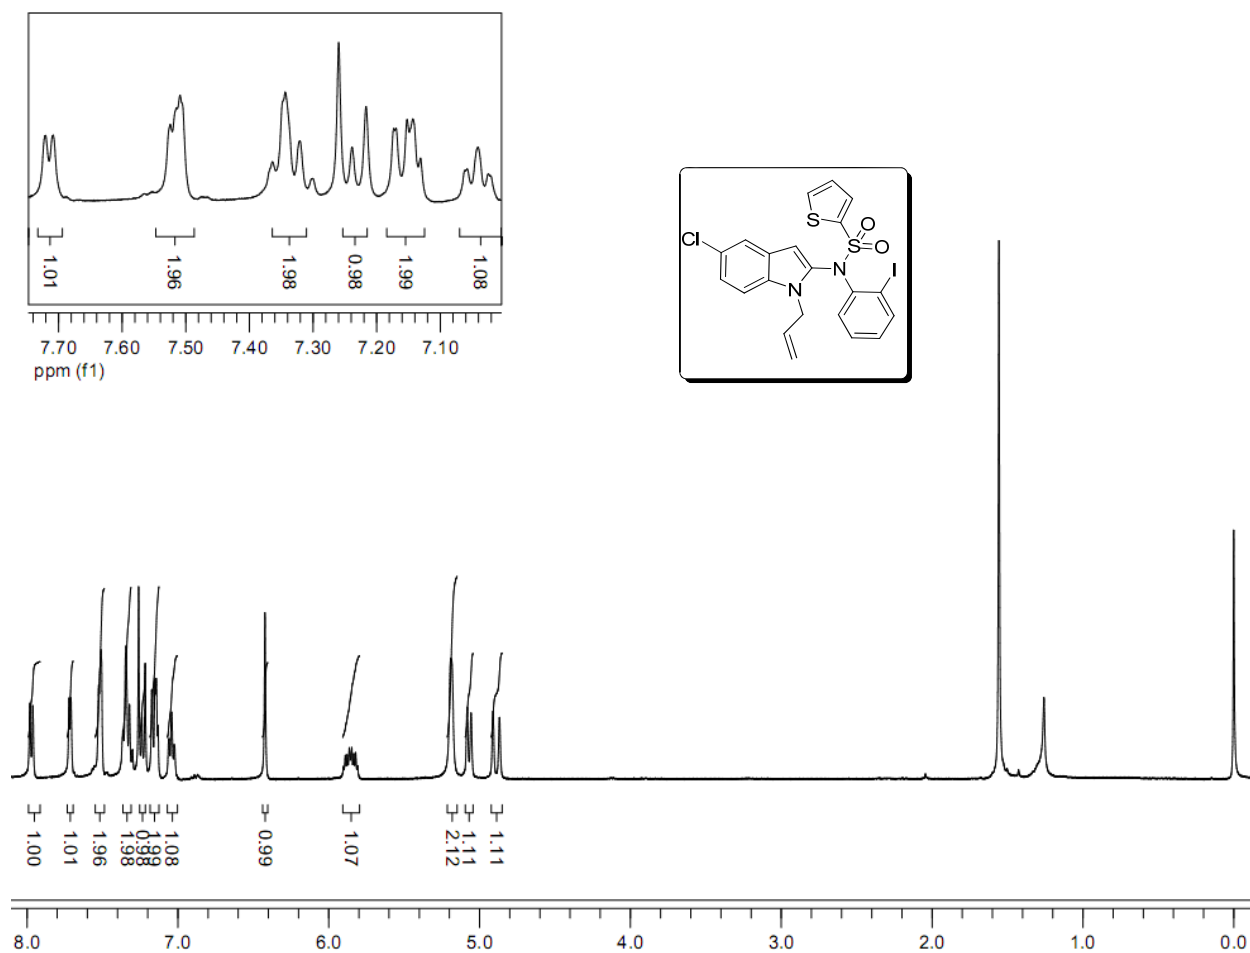

$^1\text{H}$  NMR (Varian, 400 MHz) spectrum of compound **3a** in  $\text{CDCl}_3$

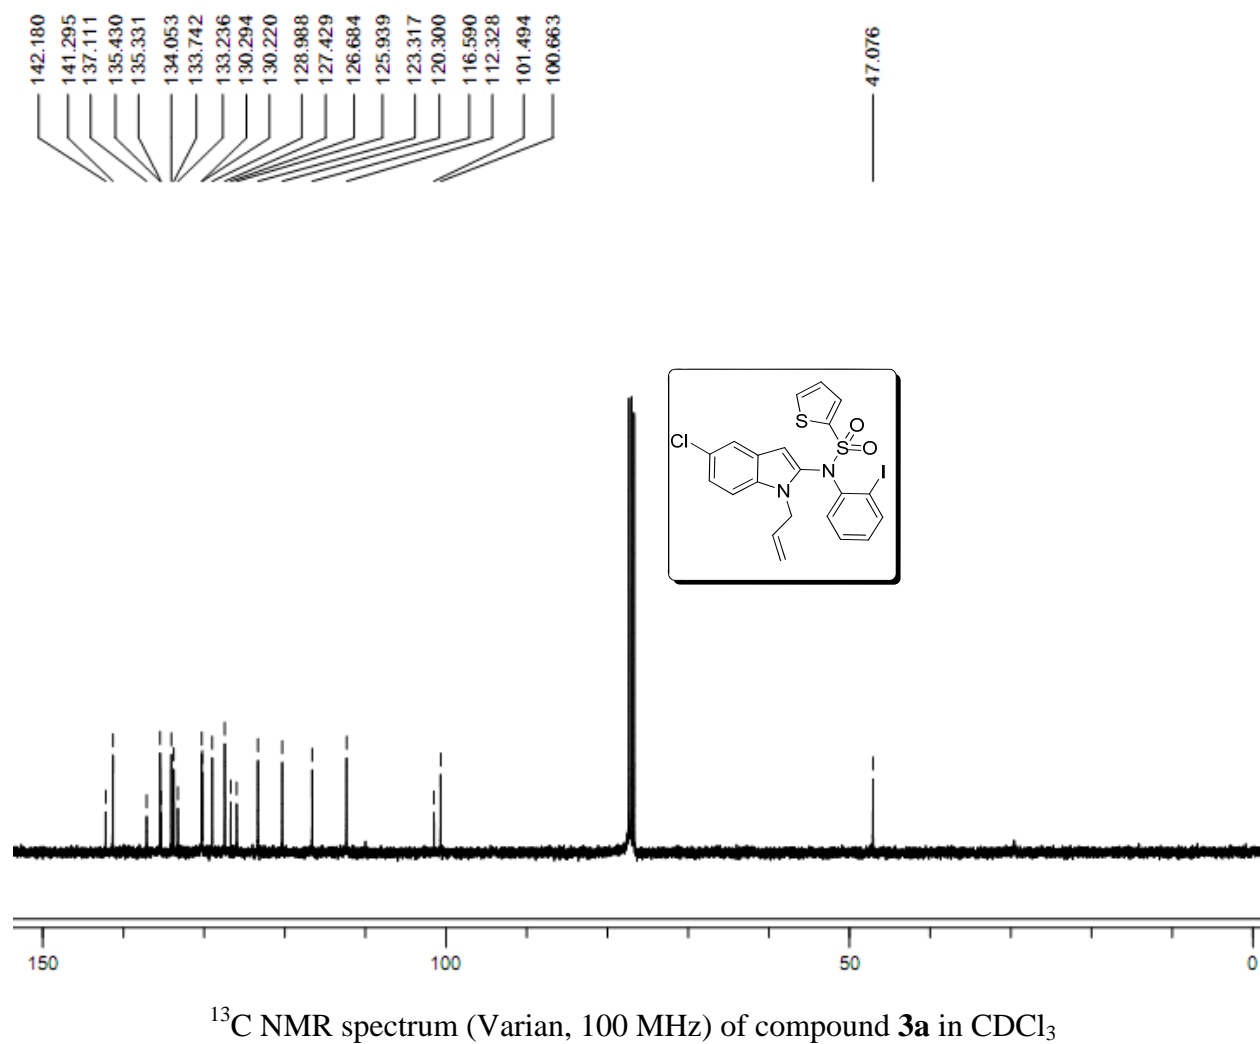

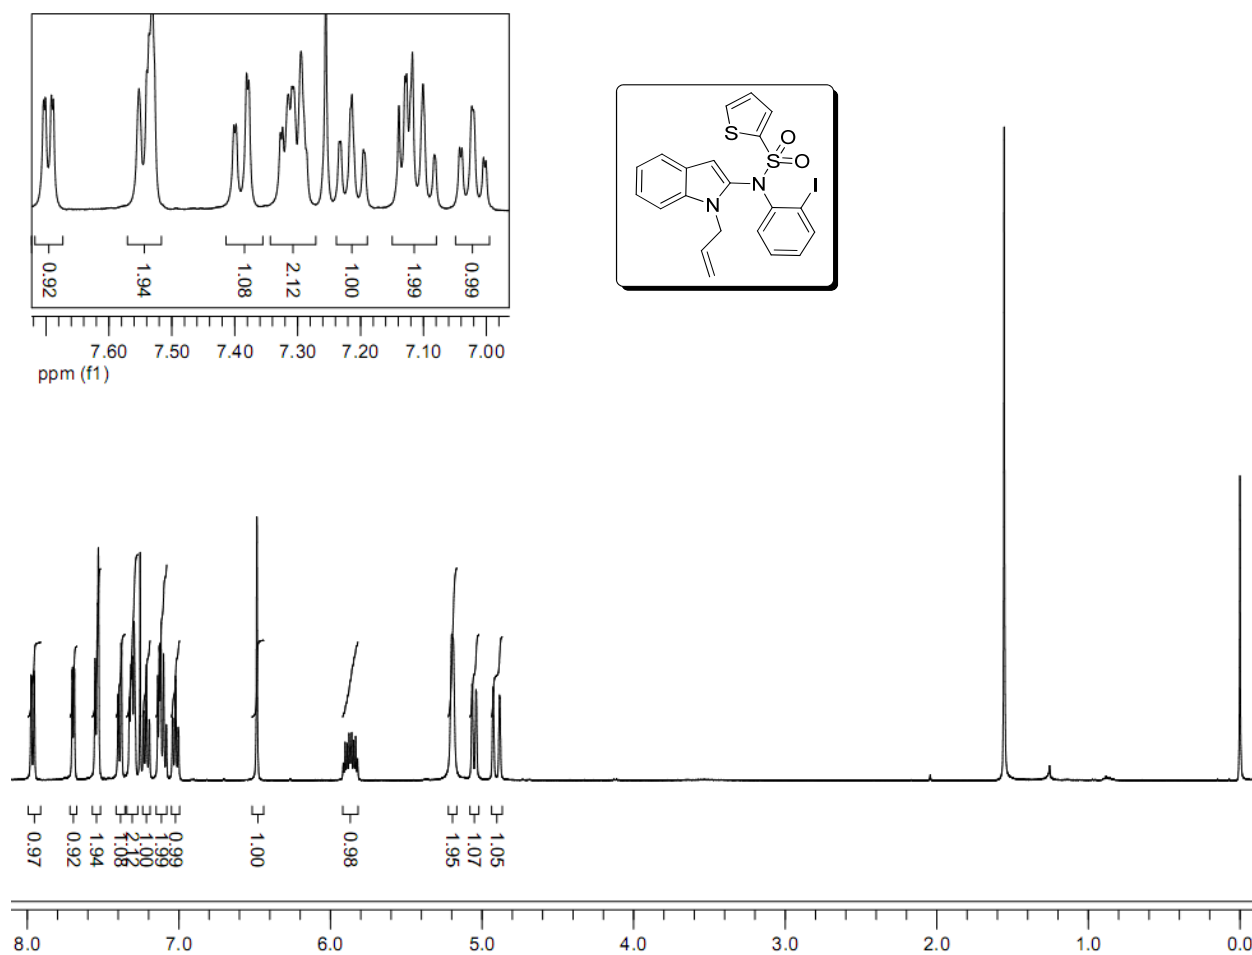

$^1\text{H}$  NMR (Varian, 400 MHz) spectrum of compound **3b** in  $\text{CDCl}_3$

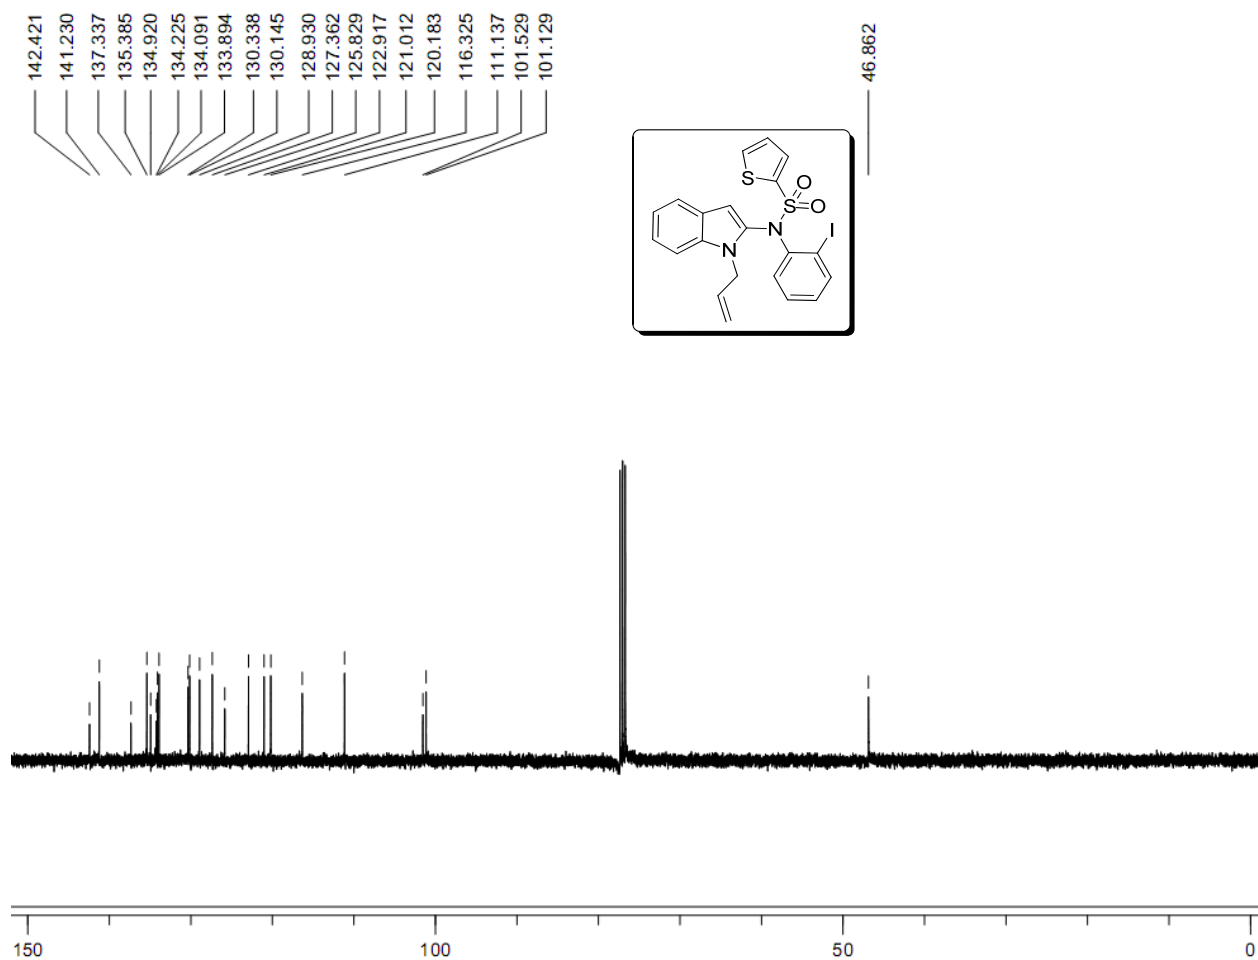

$^{13}\text{C}$  NMR spectrum (Varian, 100 MHz) of compound **3b** in  $\text{CDCl}_3$

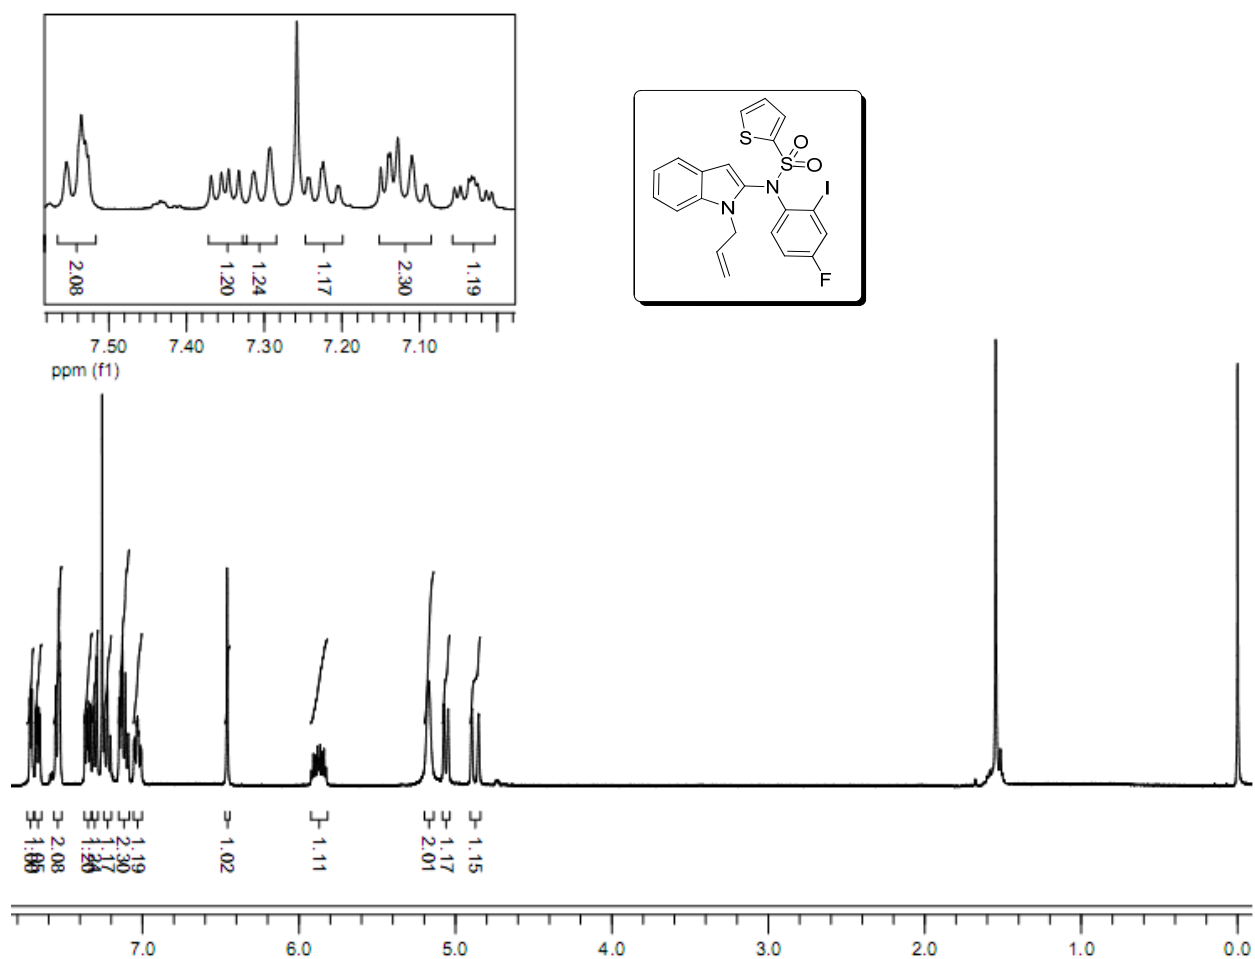

$^1\text{H}$  NMR (Varian, 400 MHz) spectrum of compound **3c** in  $\text{CDCl}_3$

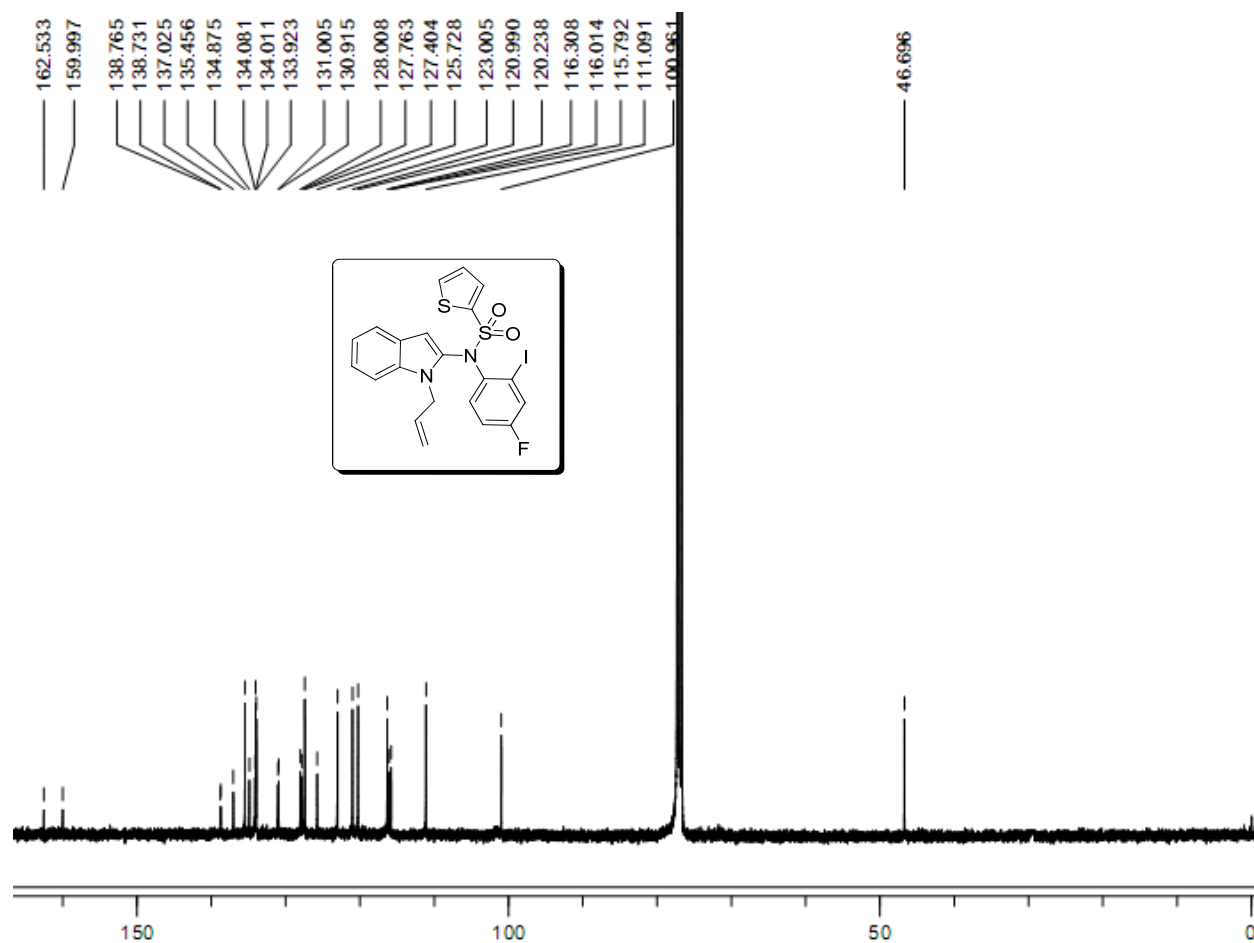

<sup>13</sup>C NMR spectrum (Varian, 100 MHz) of compound **3c** in CDCl<sub>3</sub>



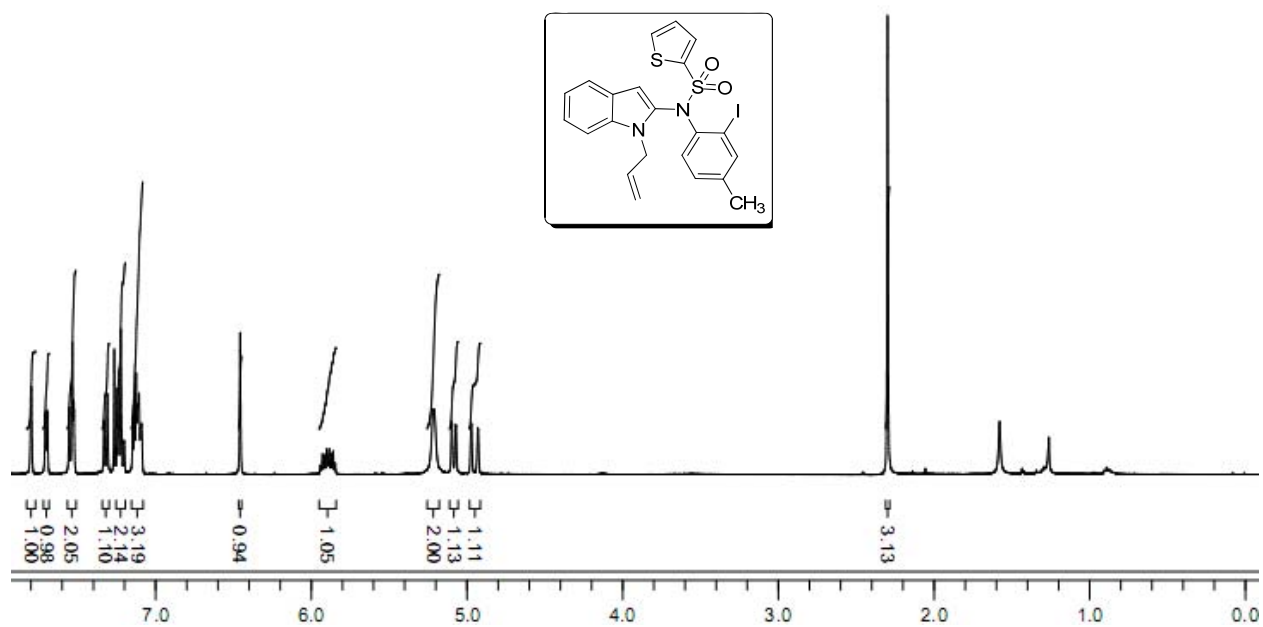

$^1\text{H}$  NMR (Varian, 400 MHz) spectrum of compound **3d** in  $\text{CDCl}_3$

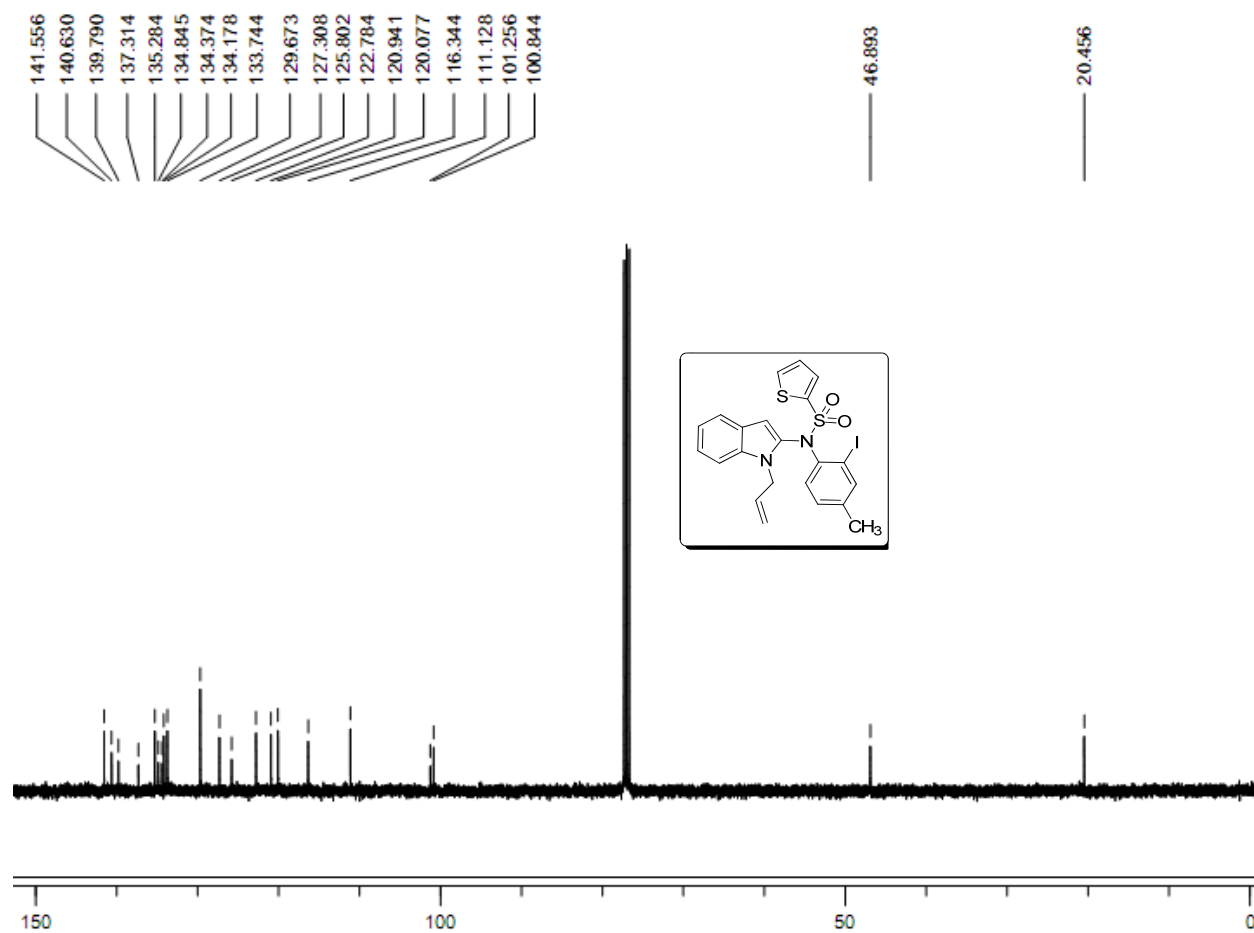

<sup>13</sup>C NMR spectrum (Varian, 100 MHz) of compound **3d** in CDCl<sub>3</sub>

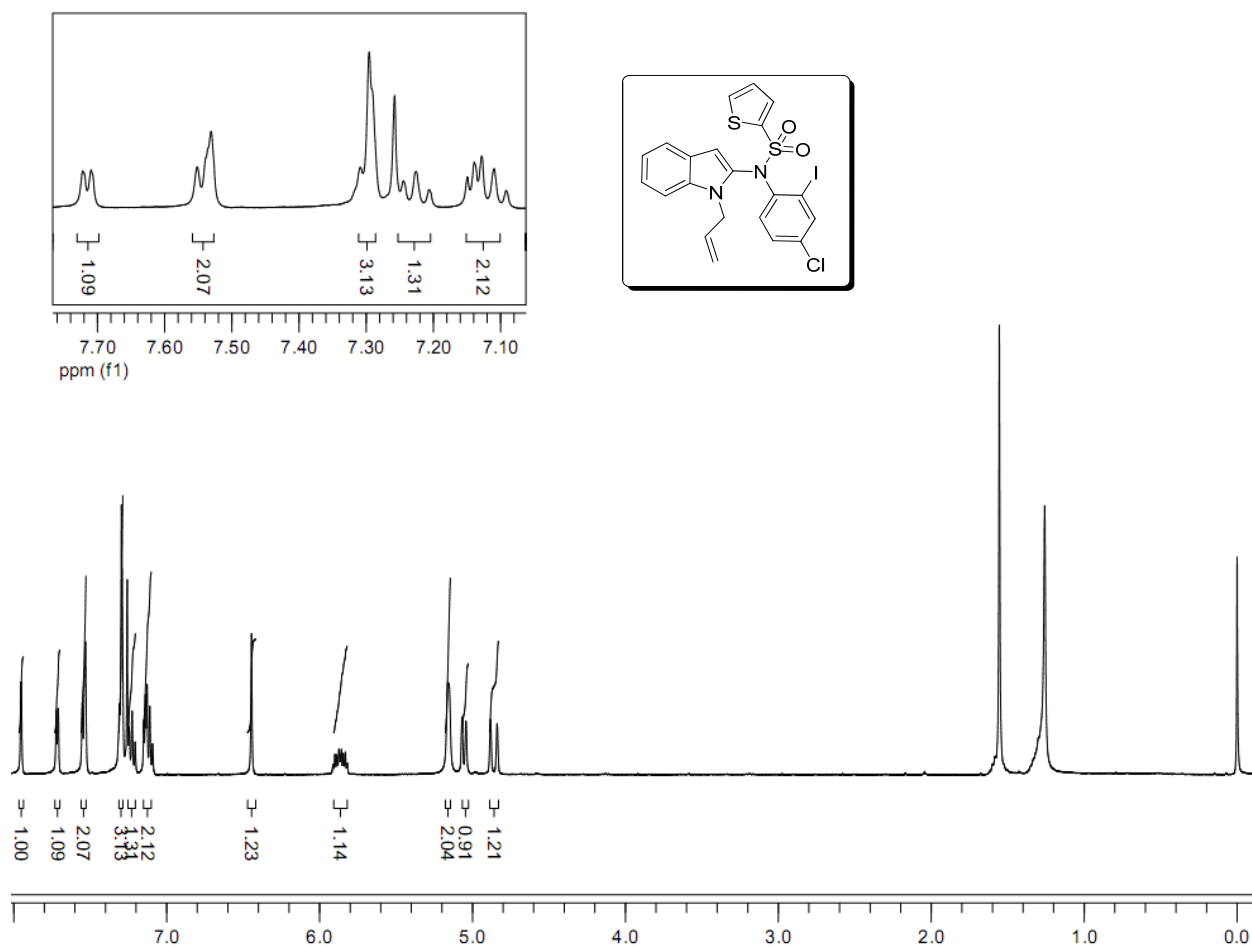

$^1\text{H}$  NMR (Varian, 400 MHz) spectrum of compound **3e** in  $\text{CDCl}_3$

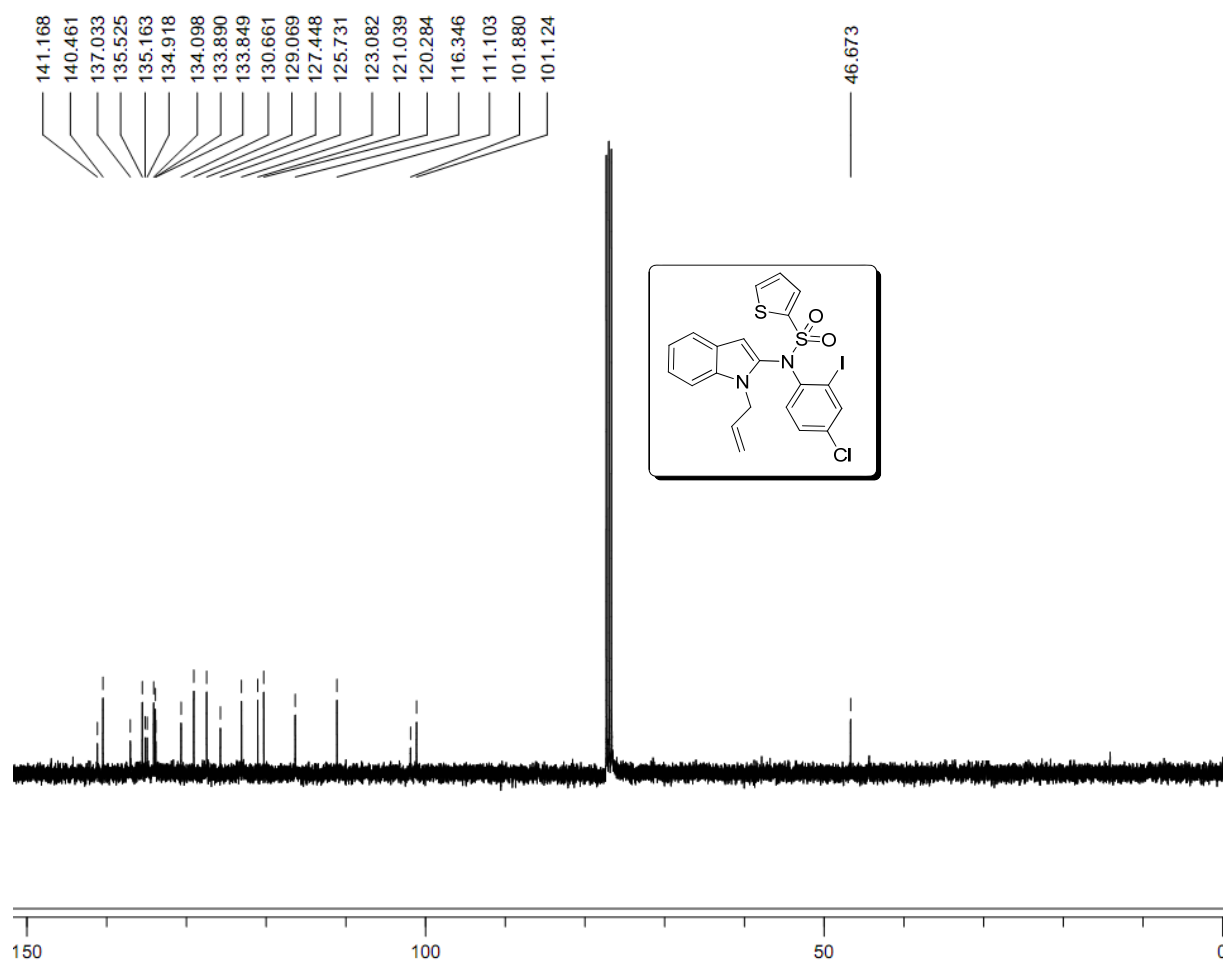

$^{13}\text{C}$  NMR spectrum (Varian, 100 MHz) of compound **3e** in  $\text{CDCl}_3$

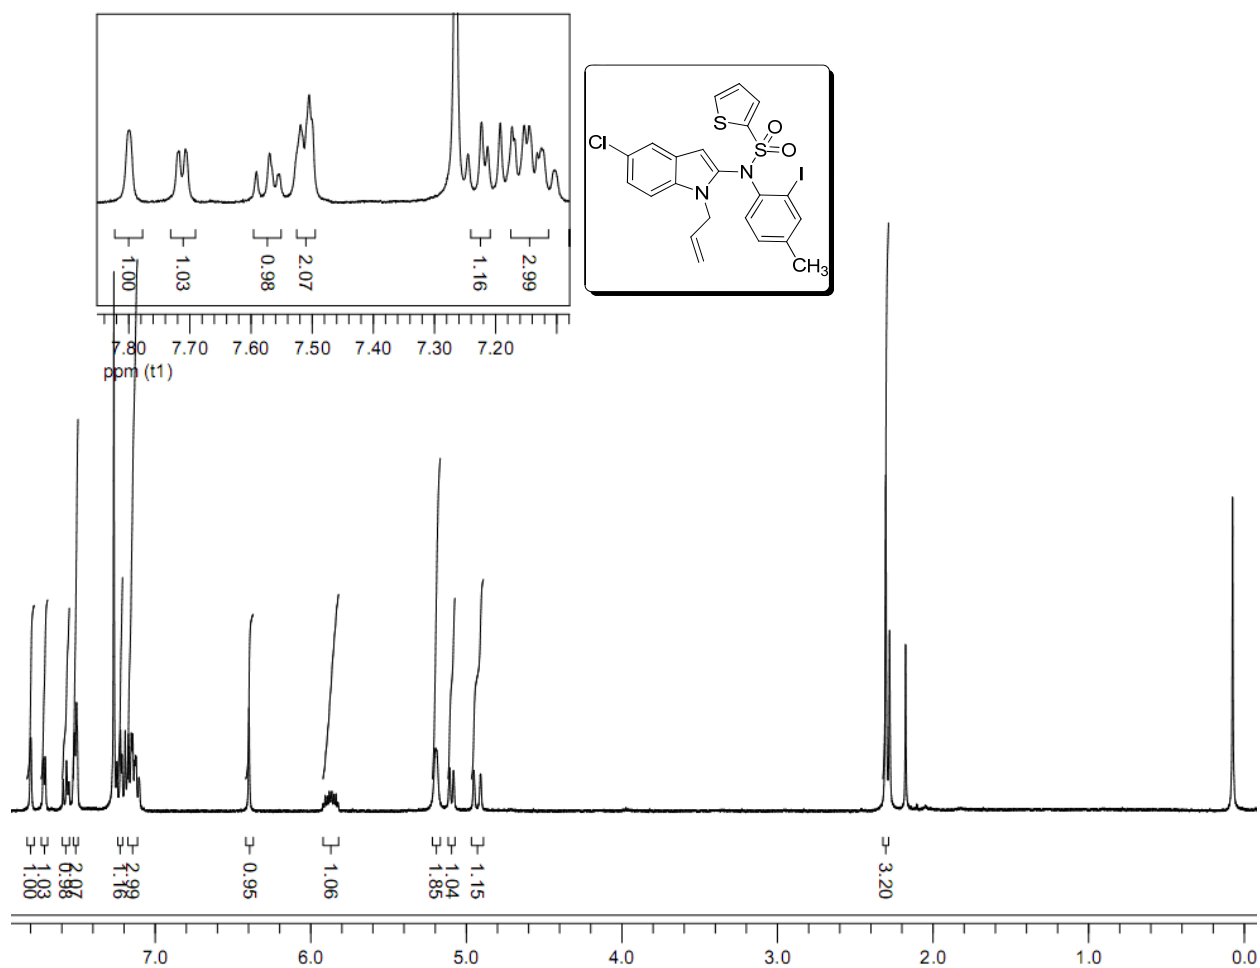

$^1\text{H}$  NMR (Varian, 400 MHz) spectrum of compound **3f** in  $\text{CDCl}_3$

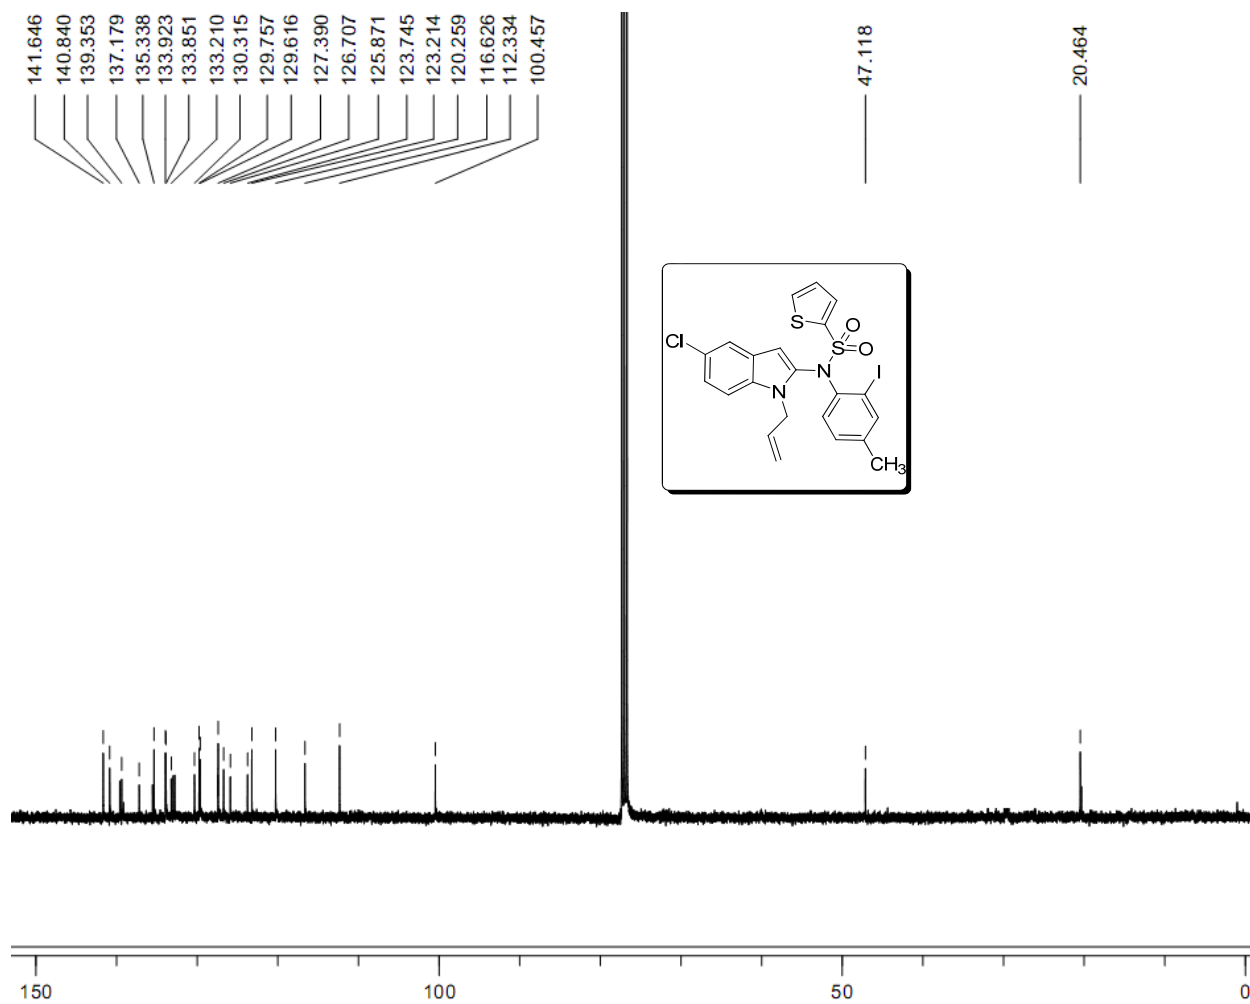

<sup>13</sup>C NMR spectrum (Varian, 100 MHz) of compound **3f** in CDCl<sub>3</sub>

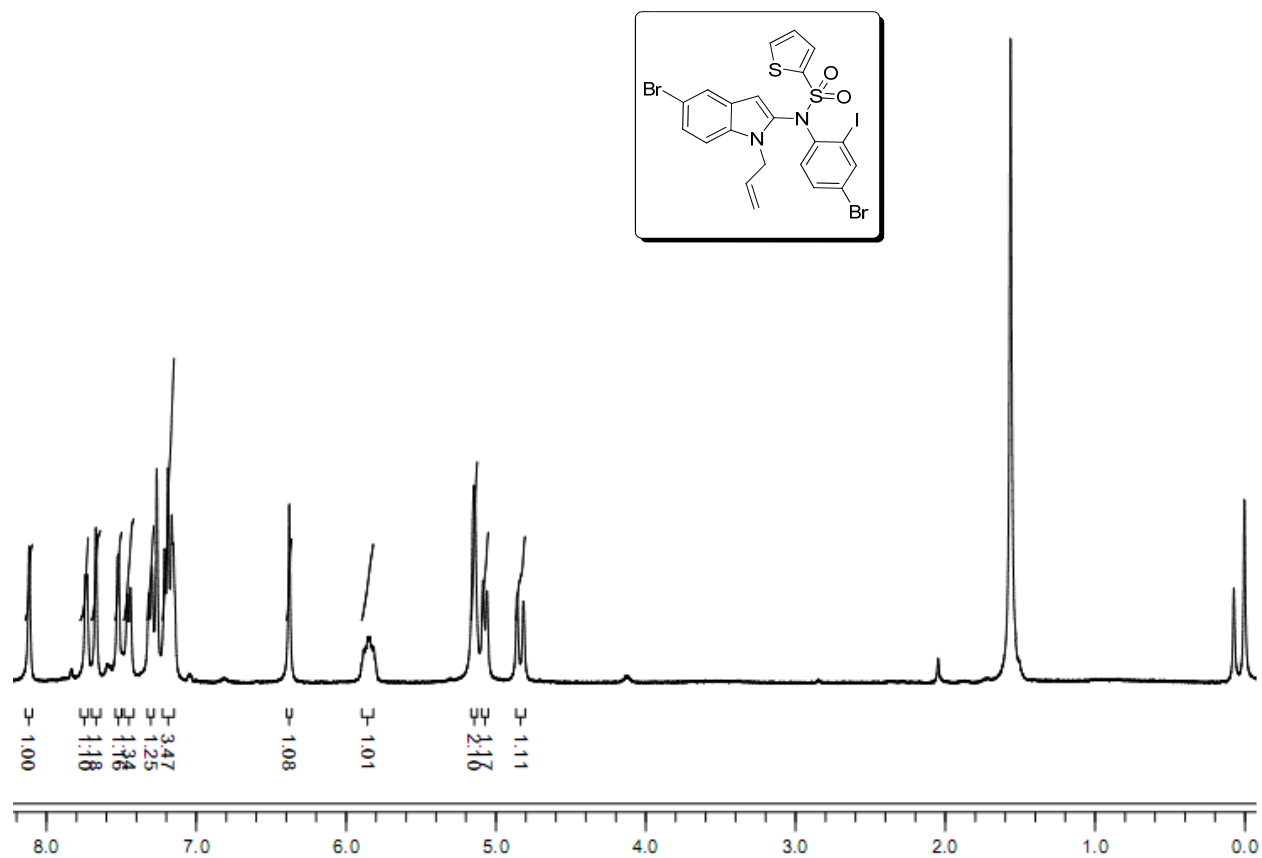

$^1\text{H}$  NMR (Varian, 400 MHz) spectrum of compound **3g** in  $\text{CDCl}_3$

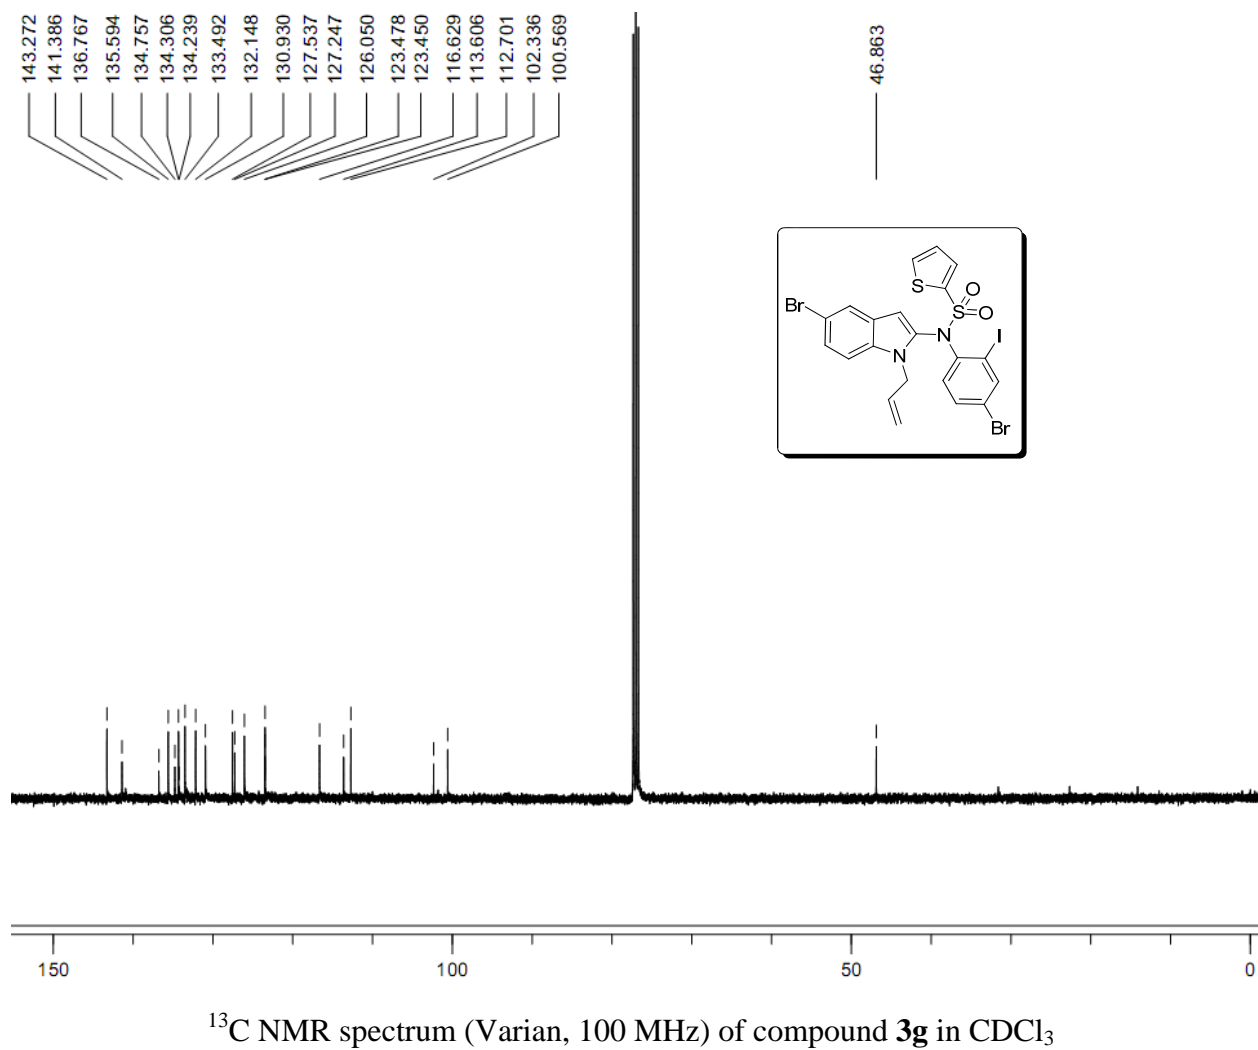



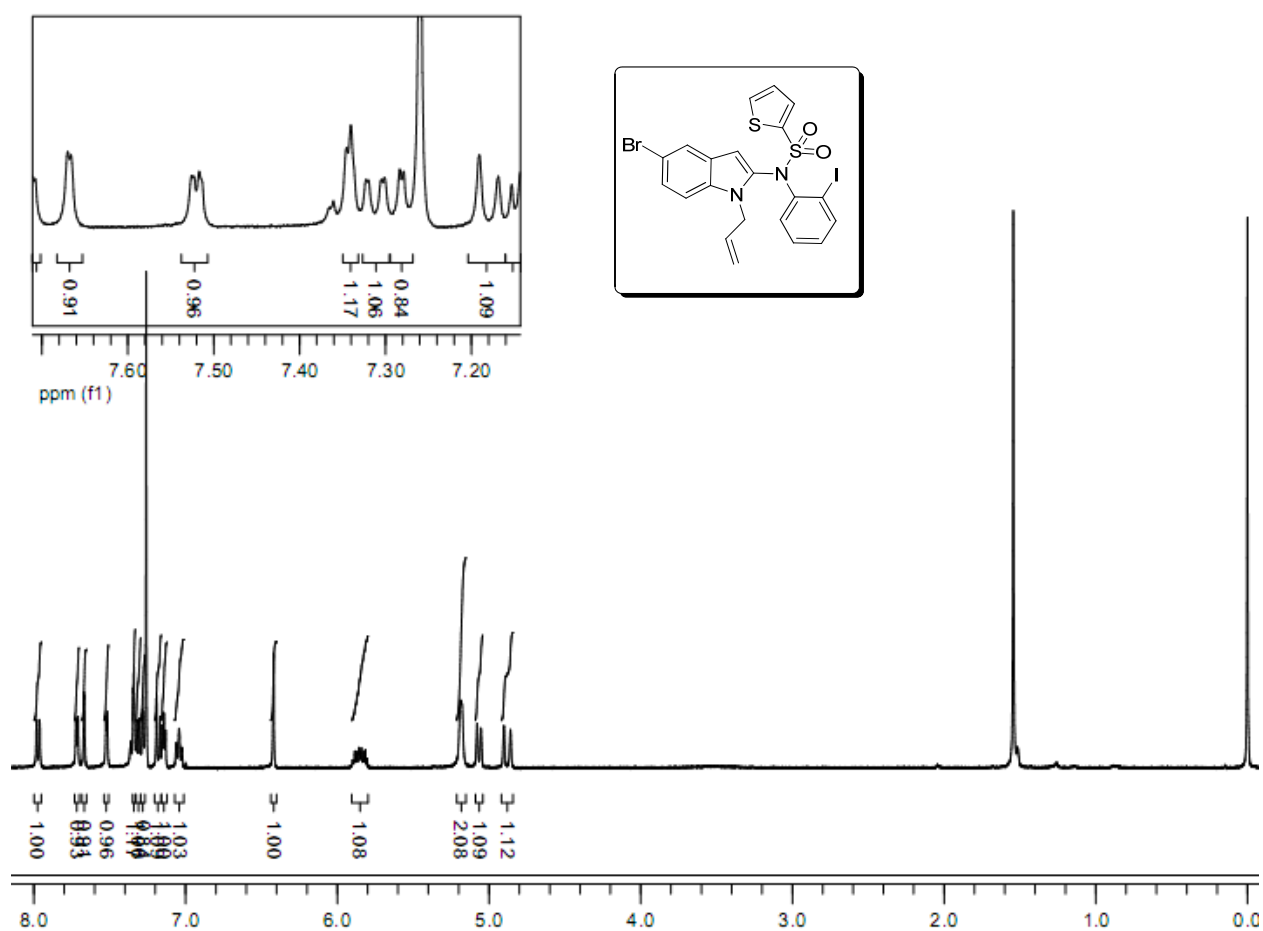

$^1\text{H}$  NMR (Varian, 400 MHz) spectrum of compound **3h** in  $\text{CDCl}_3$

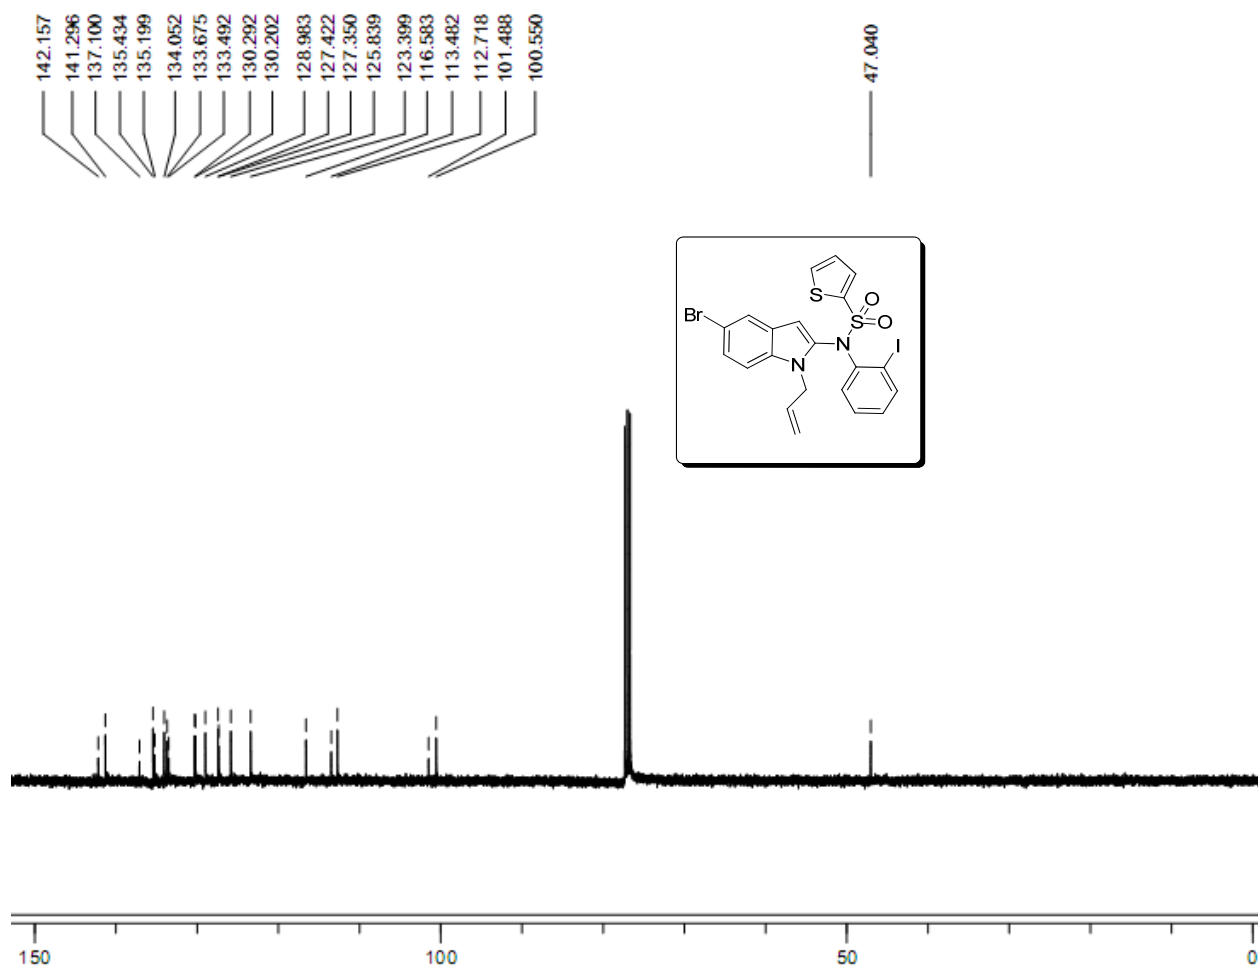

$^{13}\text{C}$  NMR spectrum (Varian, 100 MHz) of compound **3h** in  $\text{CDCl}_3$

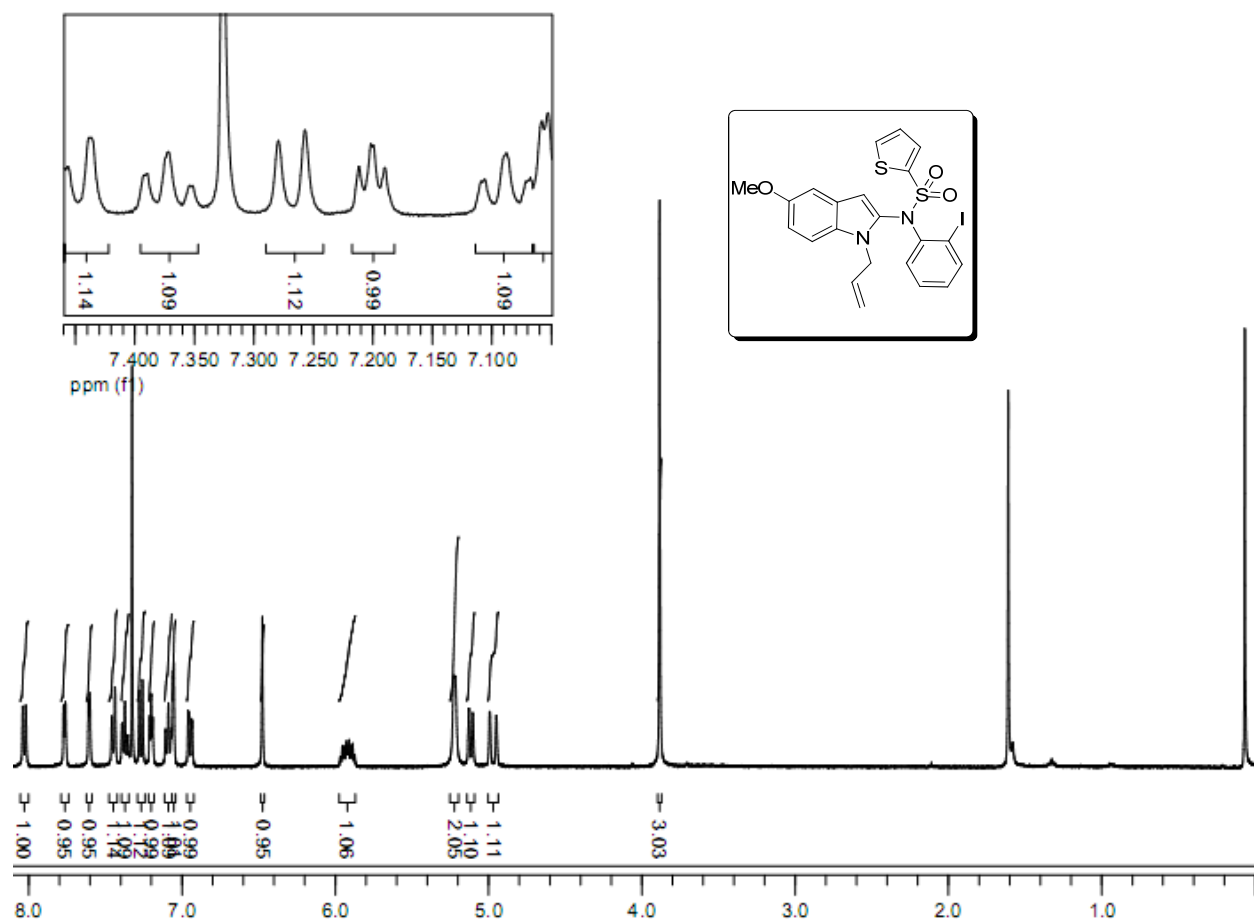

$^1\text{H}$  NMR (Varian, 400 MHz) spectrum of compound **3i** in  $\text{CDCl}_3$

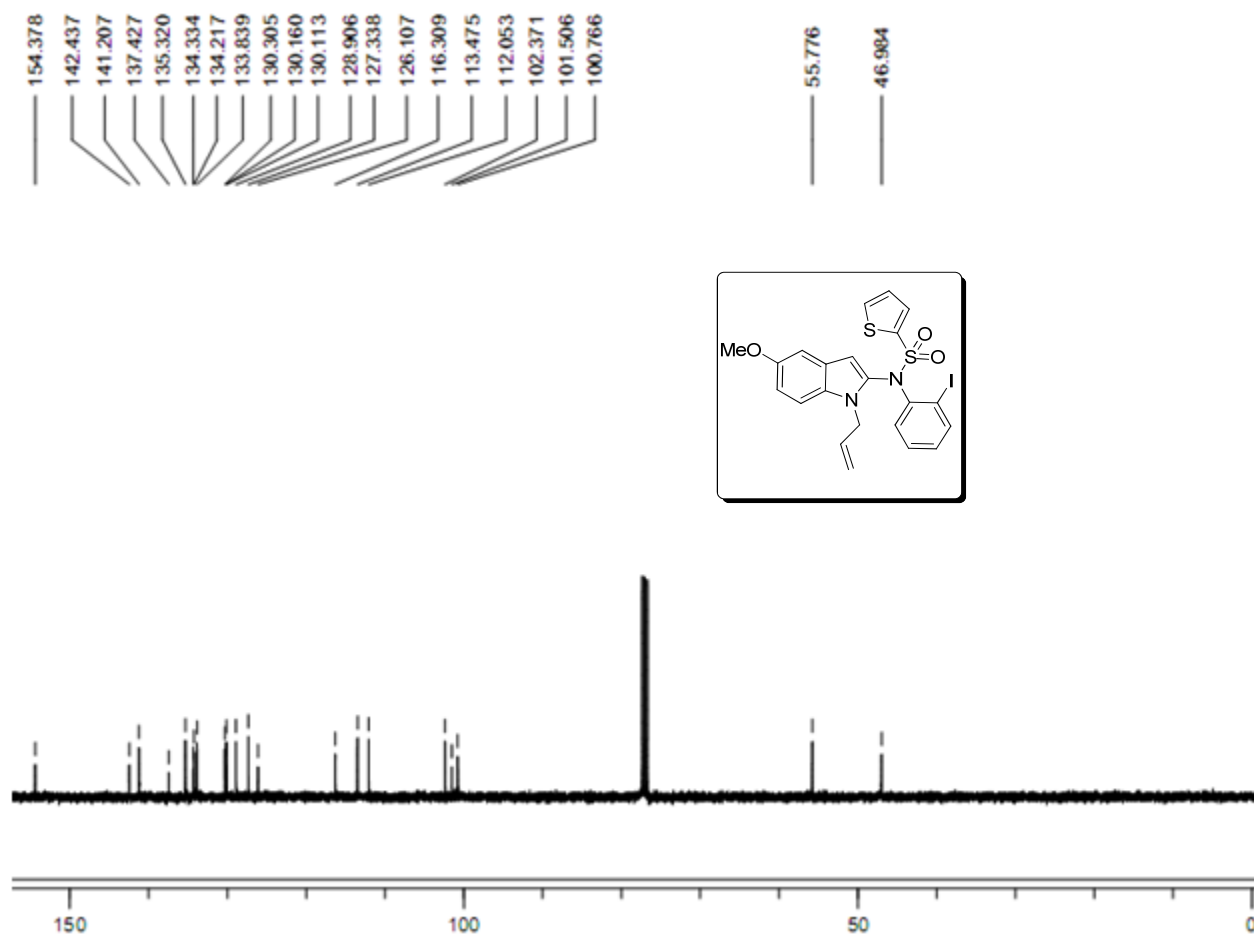

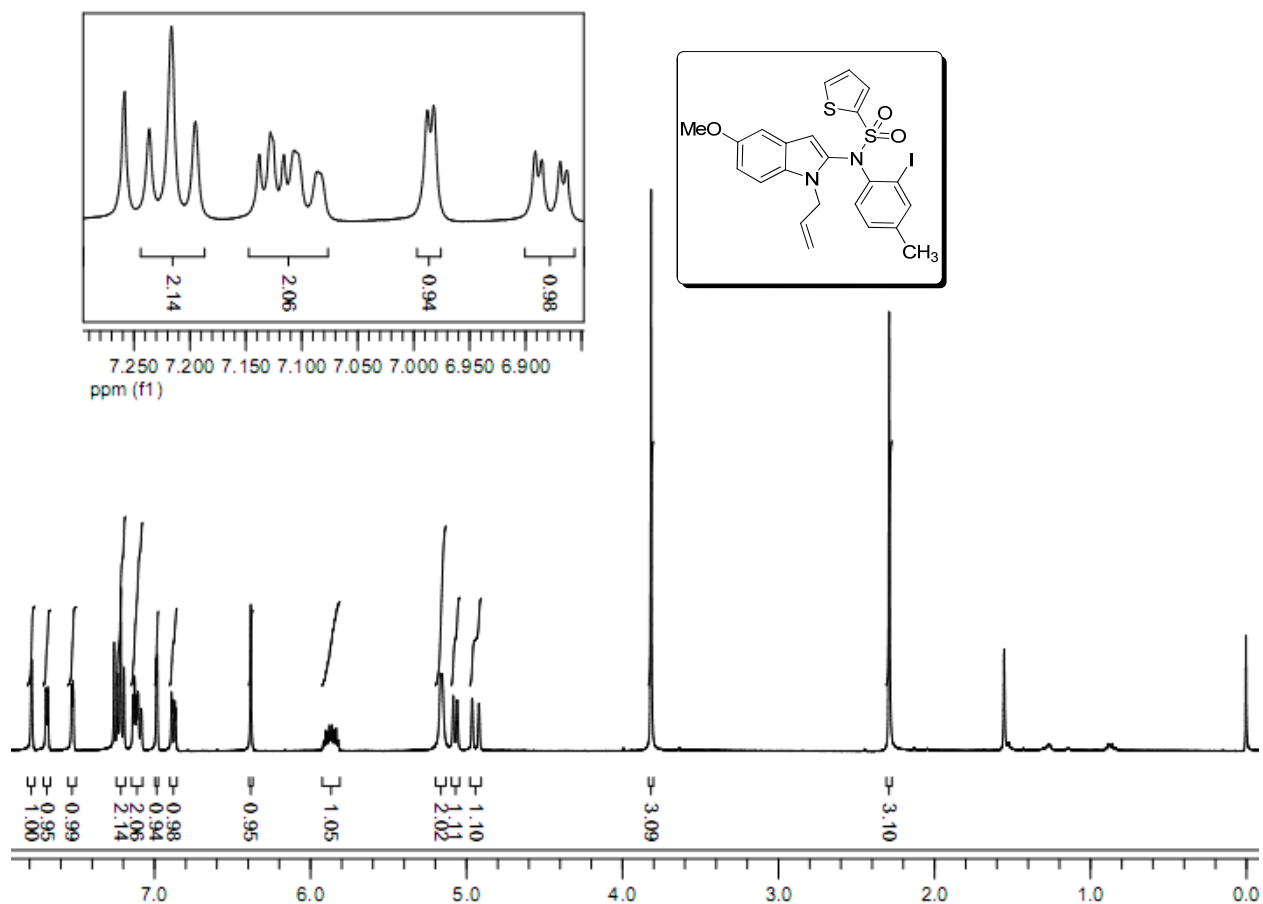

$^1\text{H}$  NMR (Varian, 400 MHz) spectrum of compound **3j** in  $\text{CDCl}_3$

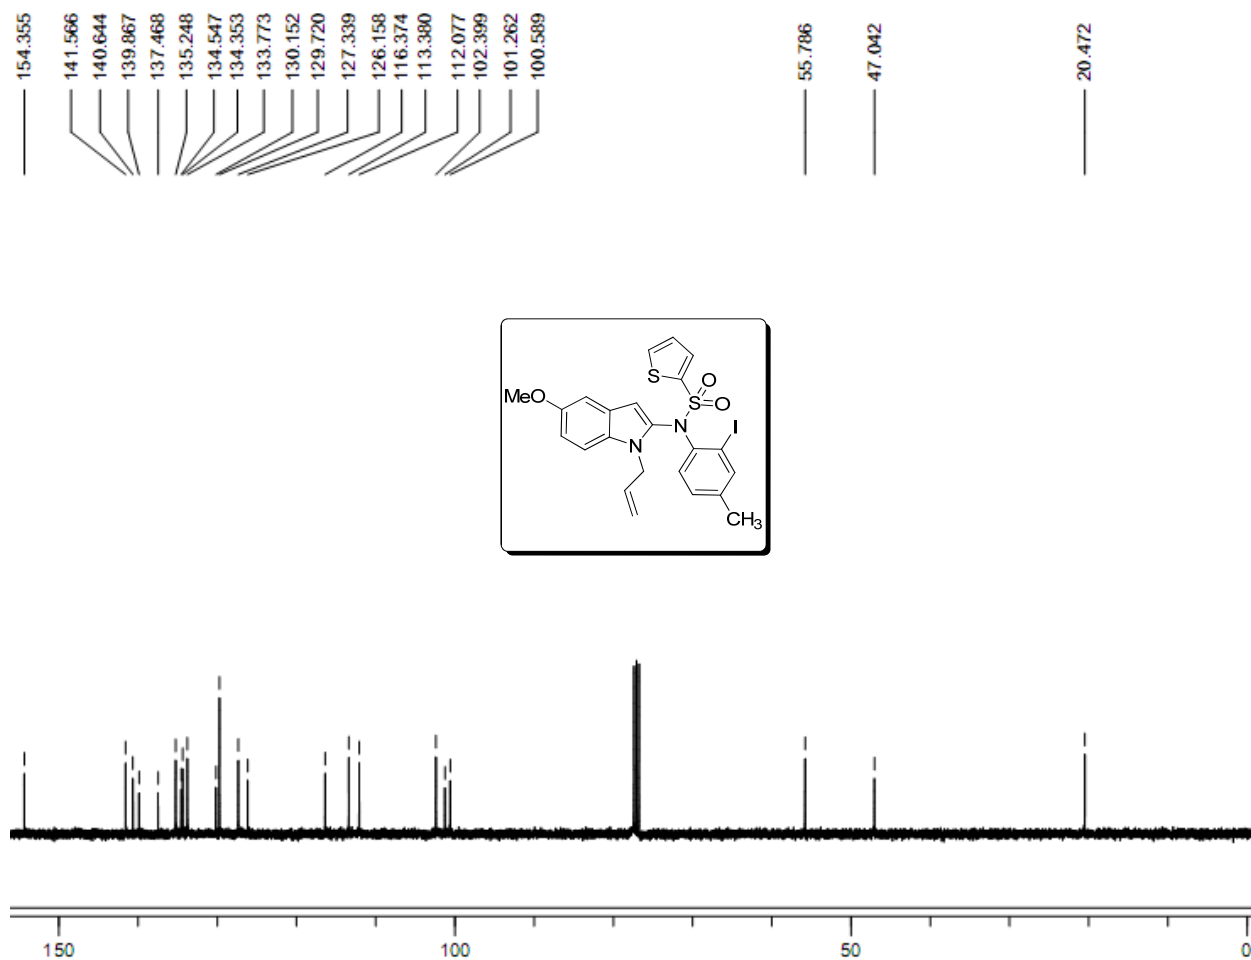

<sup>13</sup>C NMR spectrum (Varian, 100 MHz) of compound **3j** in CDCl<sub>3</sub>

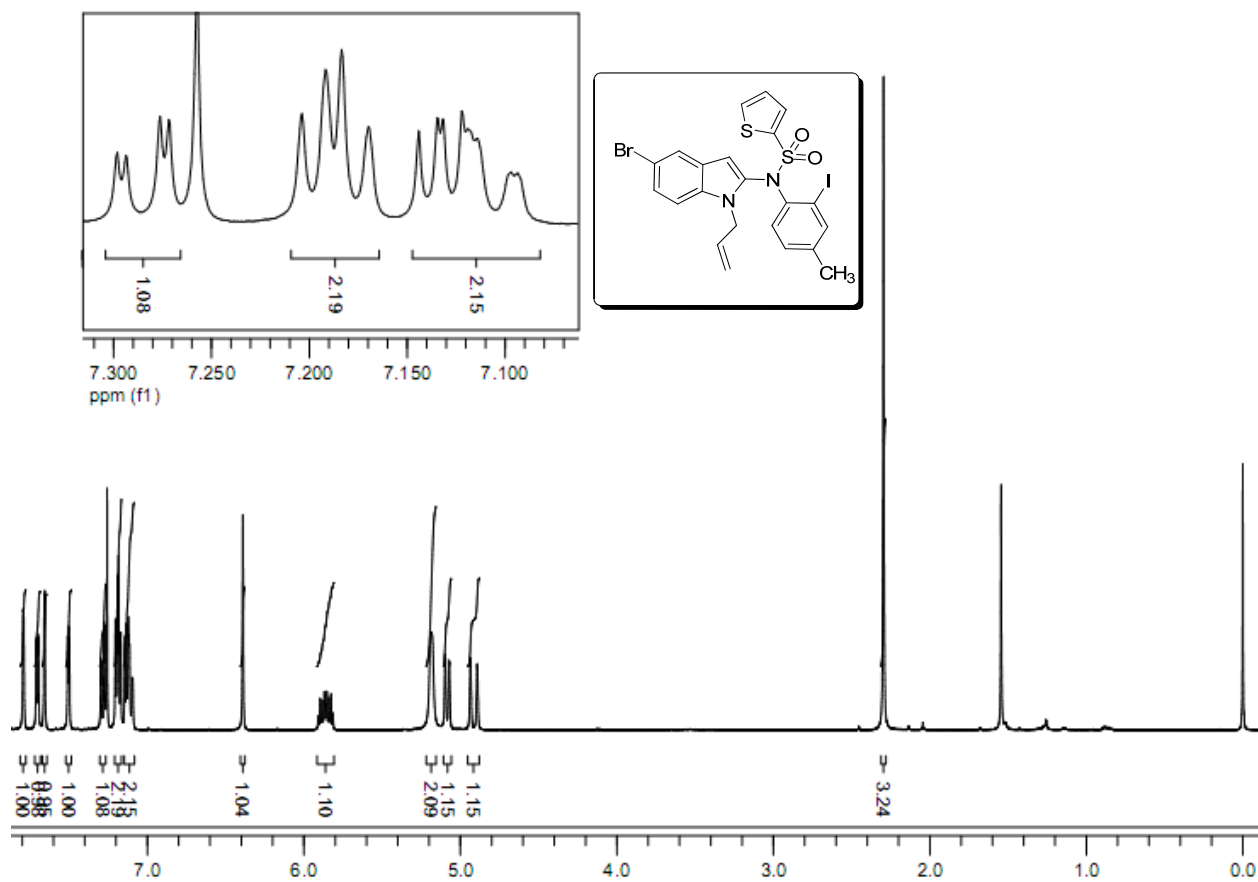

$^1\text{H}$  NMR (Varian, 400 MHz) spectrum of compound **3k** in  $\text{CDCl}_3$

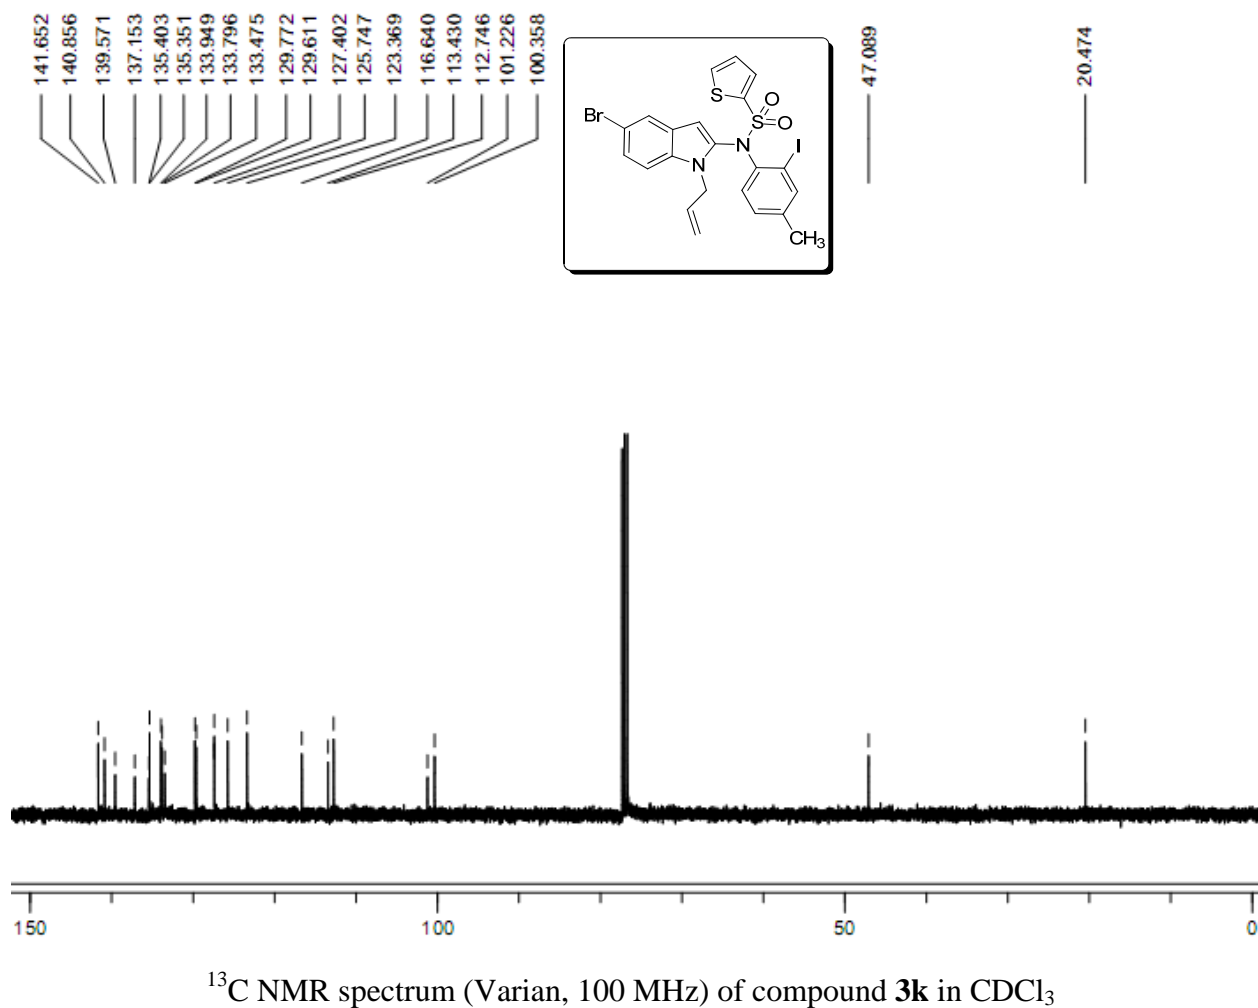



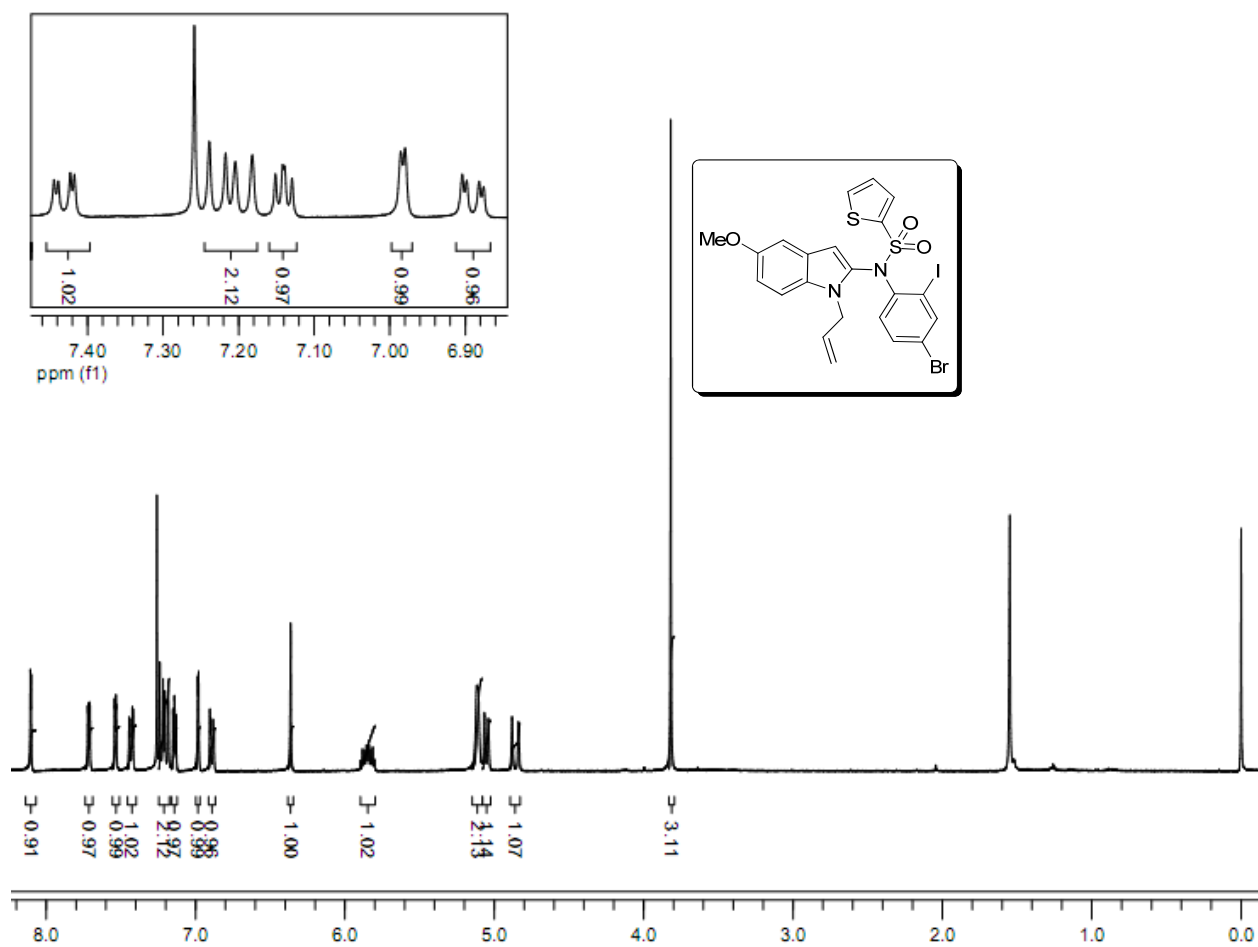

$^1\text{H}$  NMR (Varian, 400 MHz) spectrum of compound **31** in  $\text{CDCl}_3$

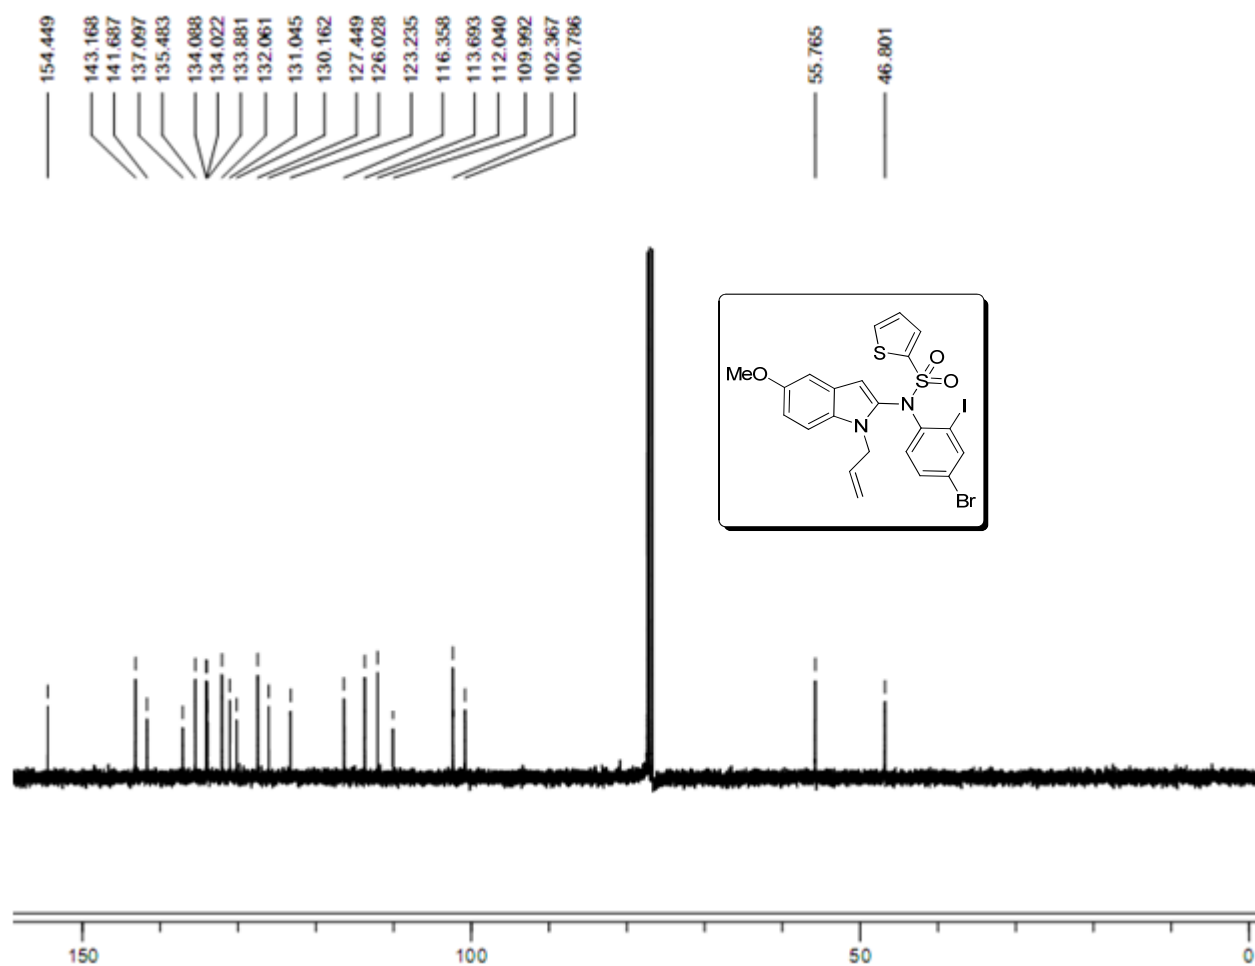

<sup>13</sup>C NMR spectrum (Varian, 100 MHz) of compound **3l** in CDCl<sub>3</sub>

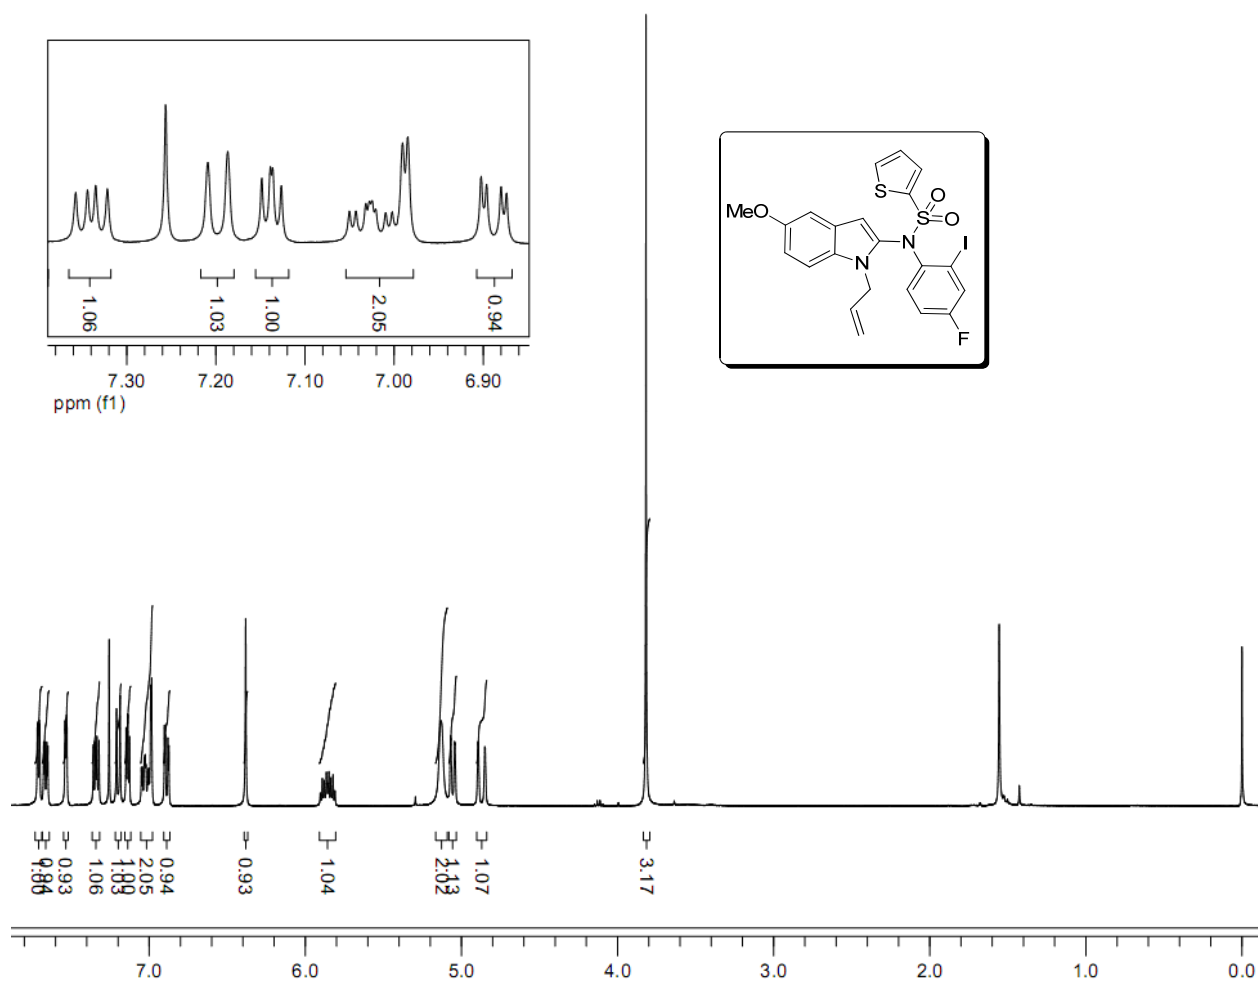

$^1\text{H}$  NMR (Varian, 400 MHz) spectrum of compound **3m** in  $\text{CDCl}_3$

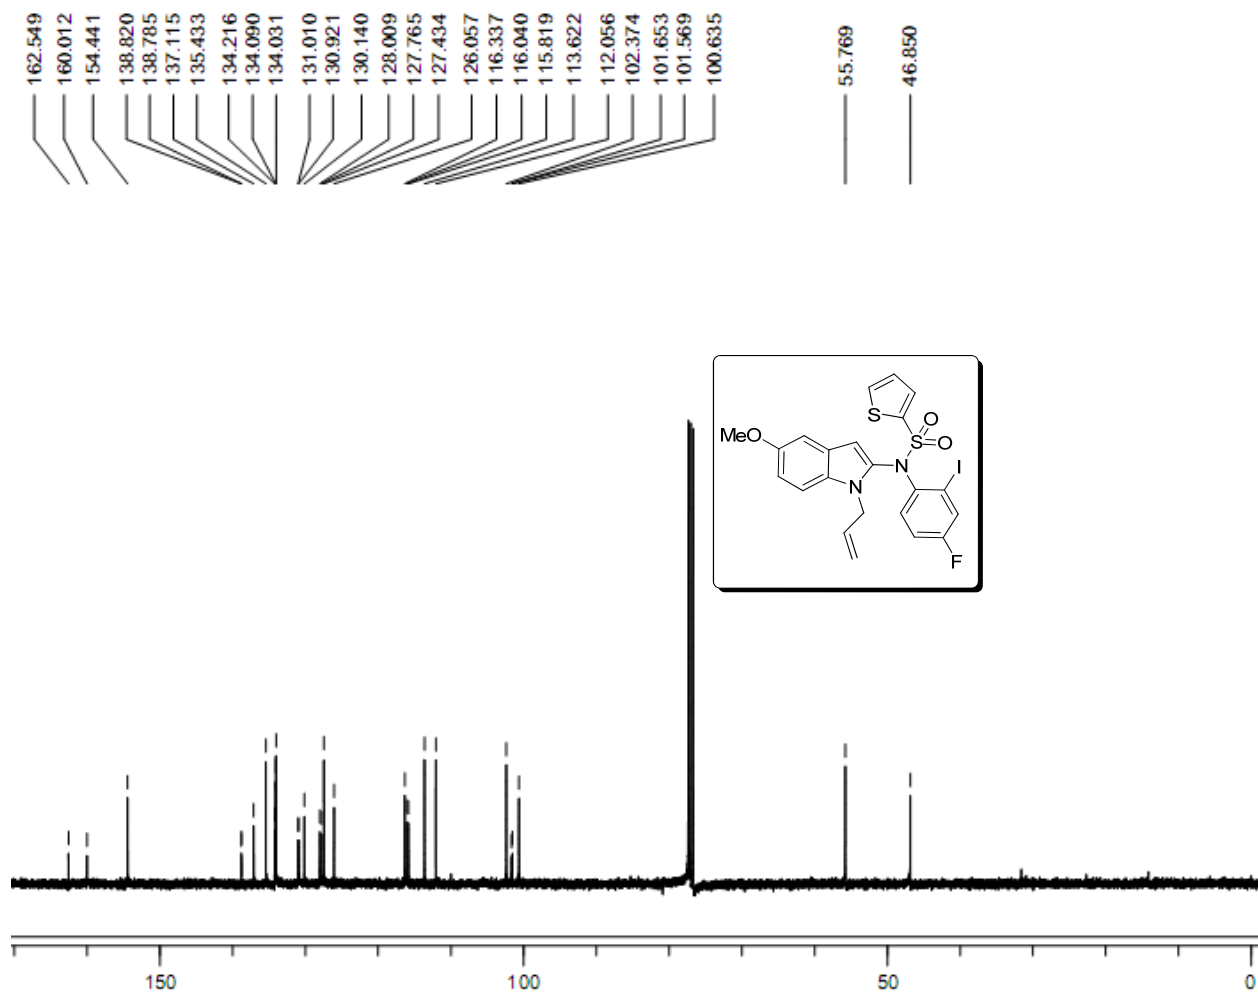

$^{13}\text{C}$  NMR spectrum (Varian, 100 MHz) of compound **3m** in  $\text{CDCl}_3$

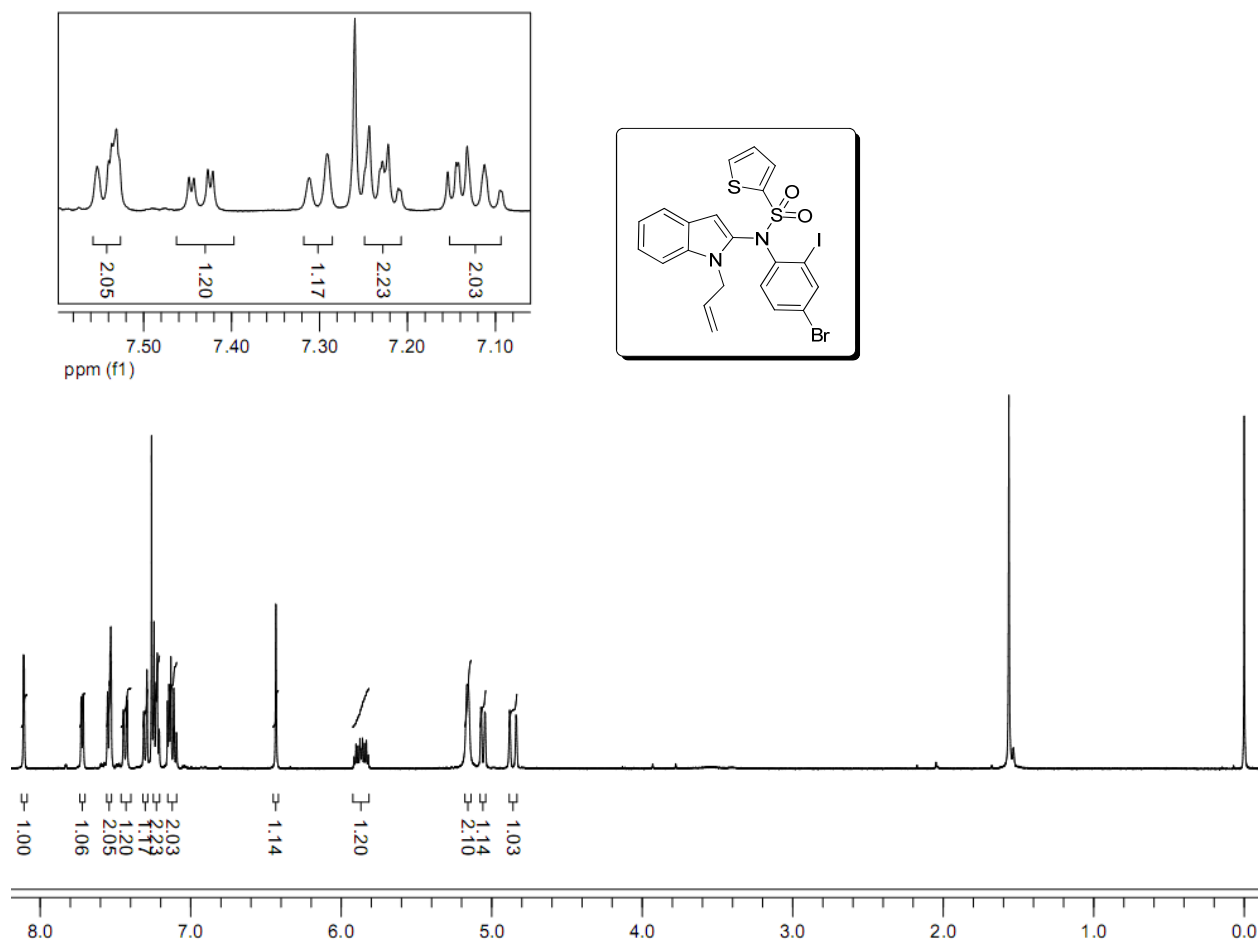

$^1\text{H}$  NMR (Varian, 400 MHz) spectrum of compound **3n** in  $\text{CDCl}_3$

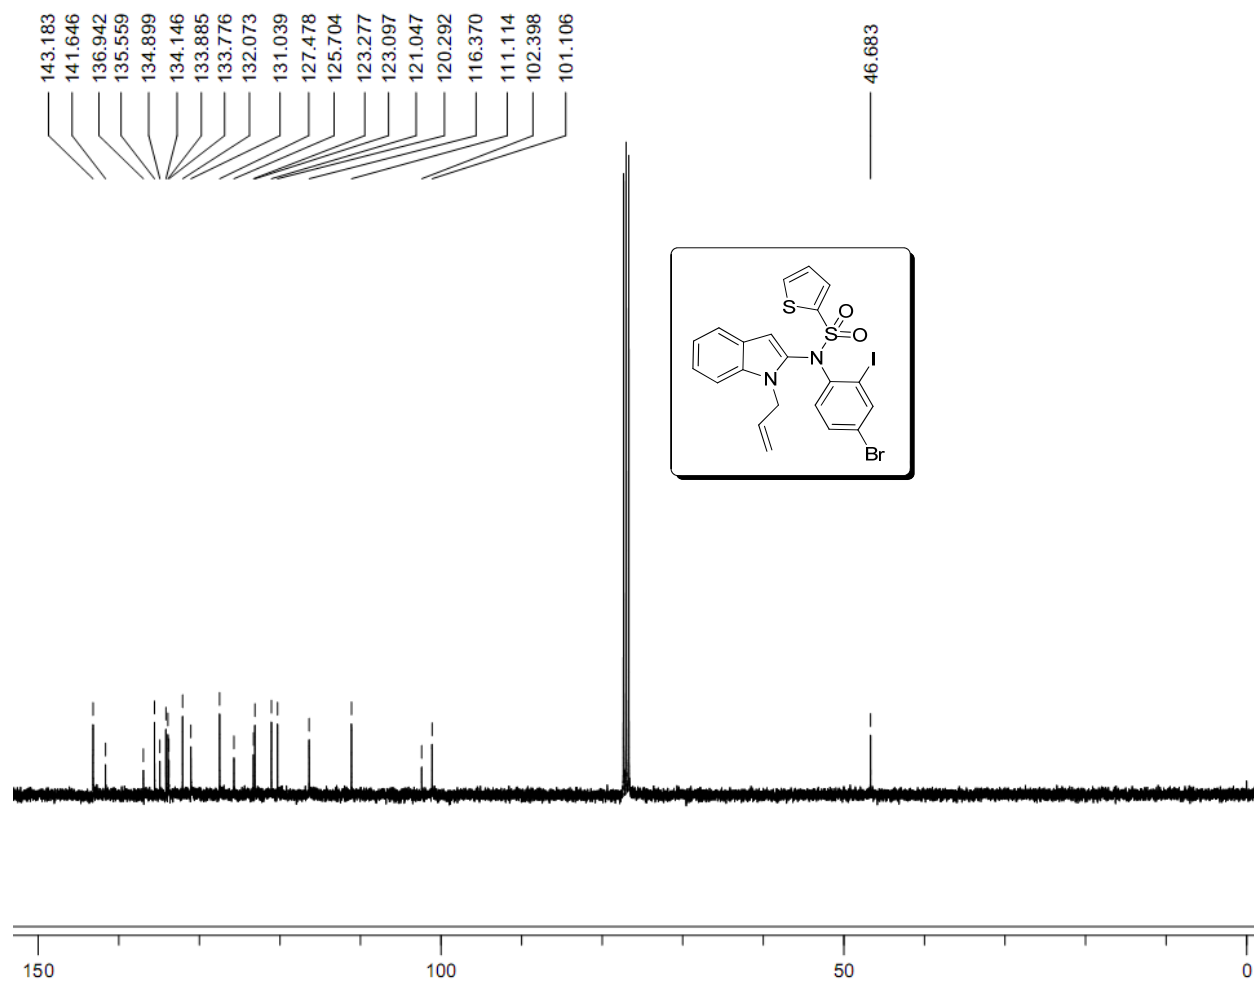

<sup>13</sup>C NMR spectrum (Varian, 100 MHz) of compound **3n** in CDCl<sub>3</sub>

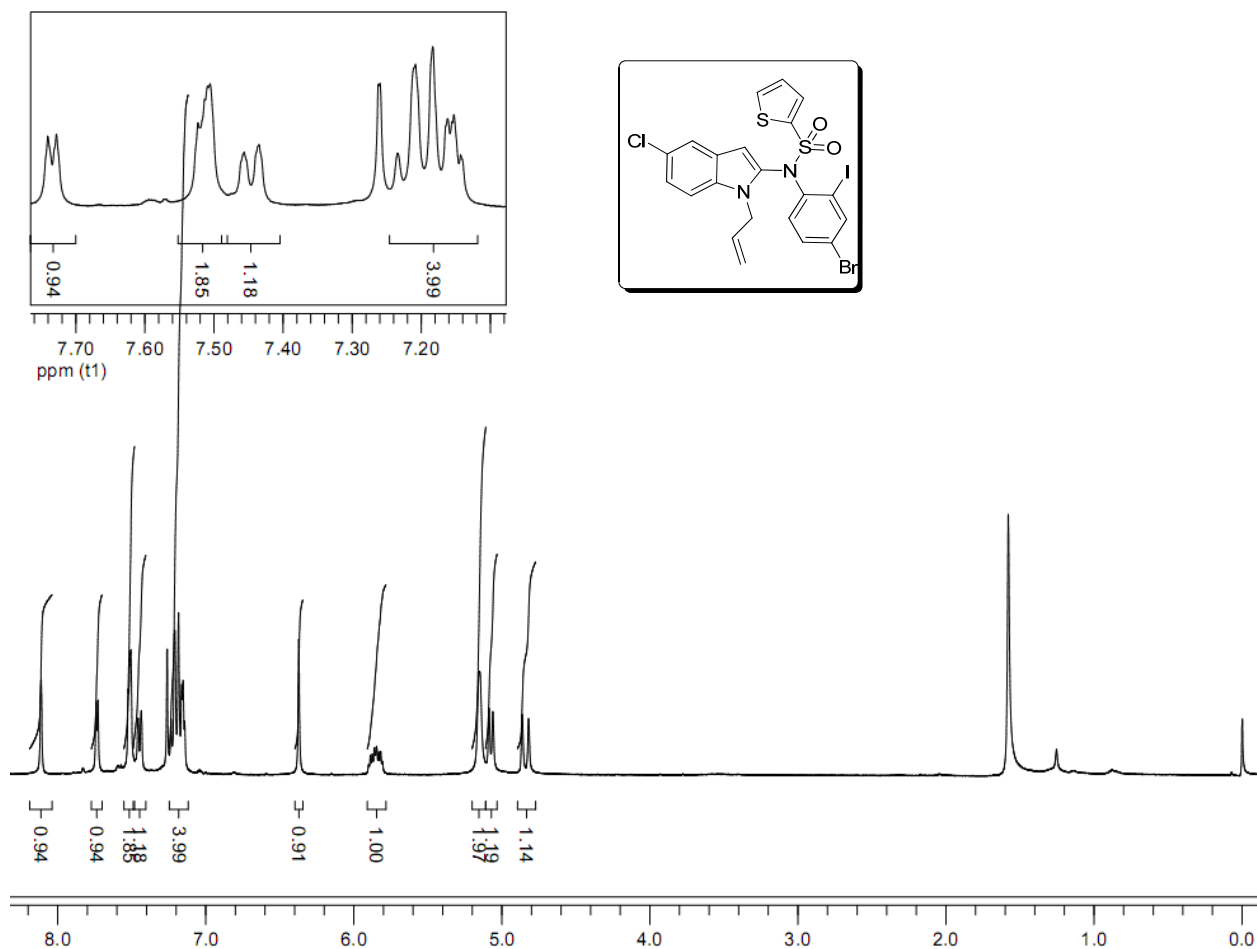

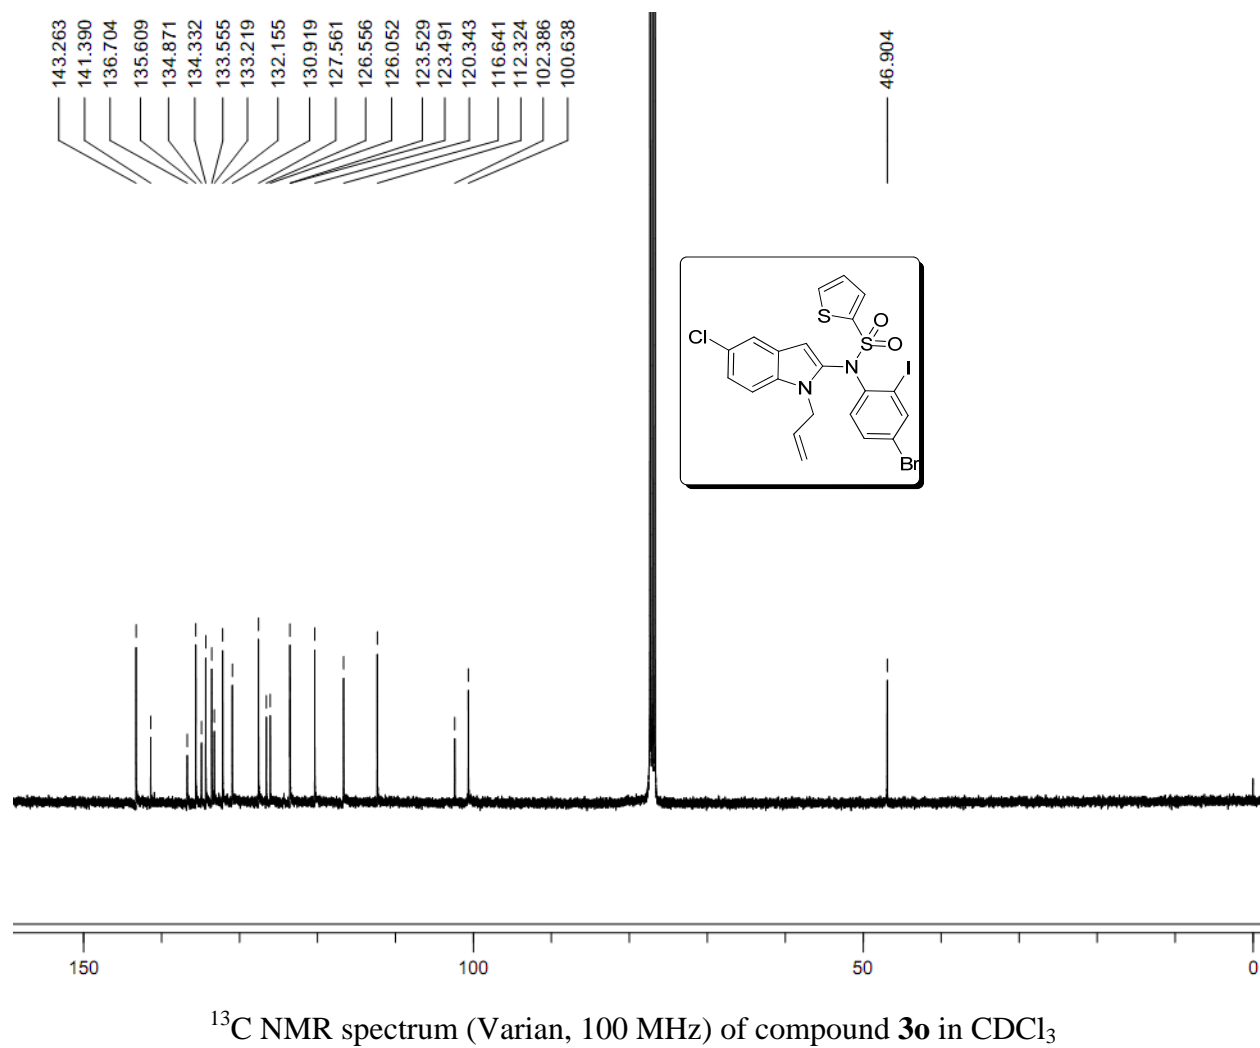



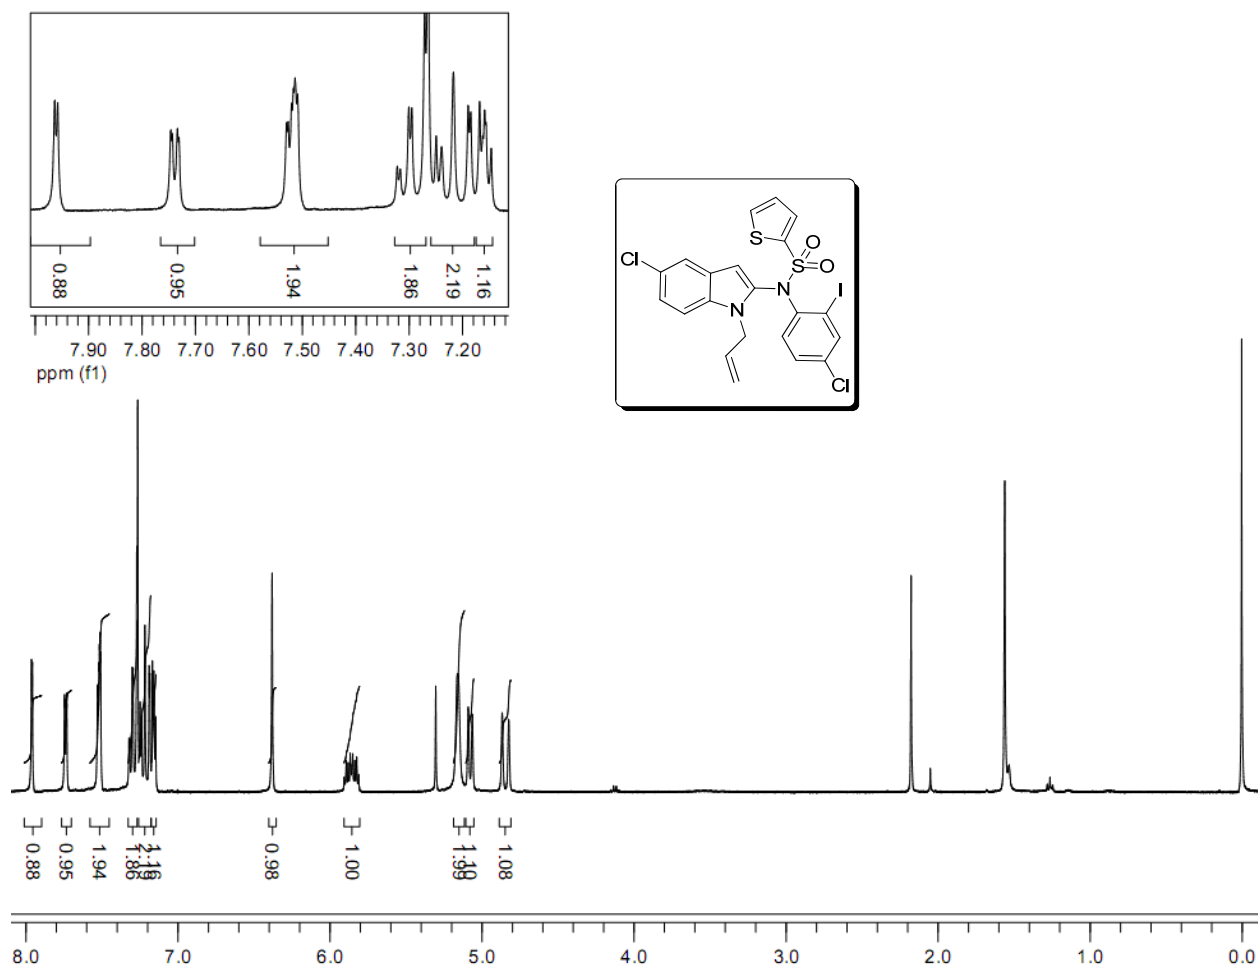

$^1\text{H}$  NMR (Varian, 400 MHz) spectrum of compound **3p** in  $\text{CDCl}_3$

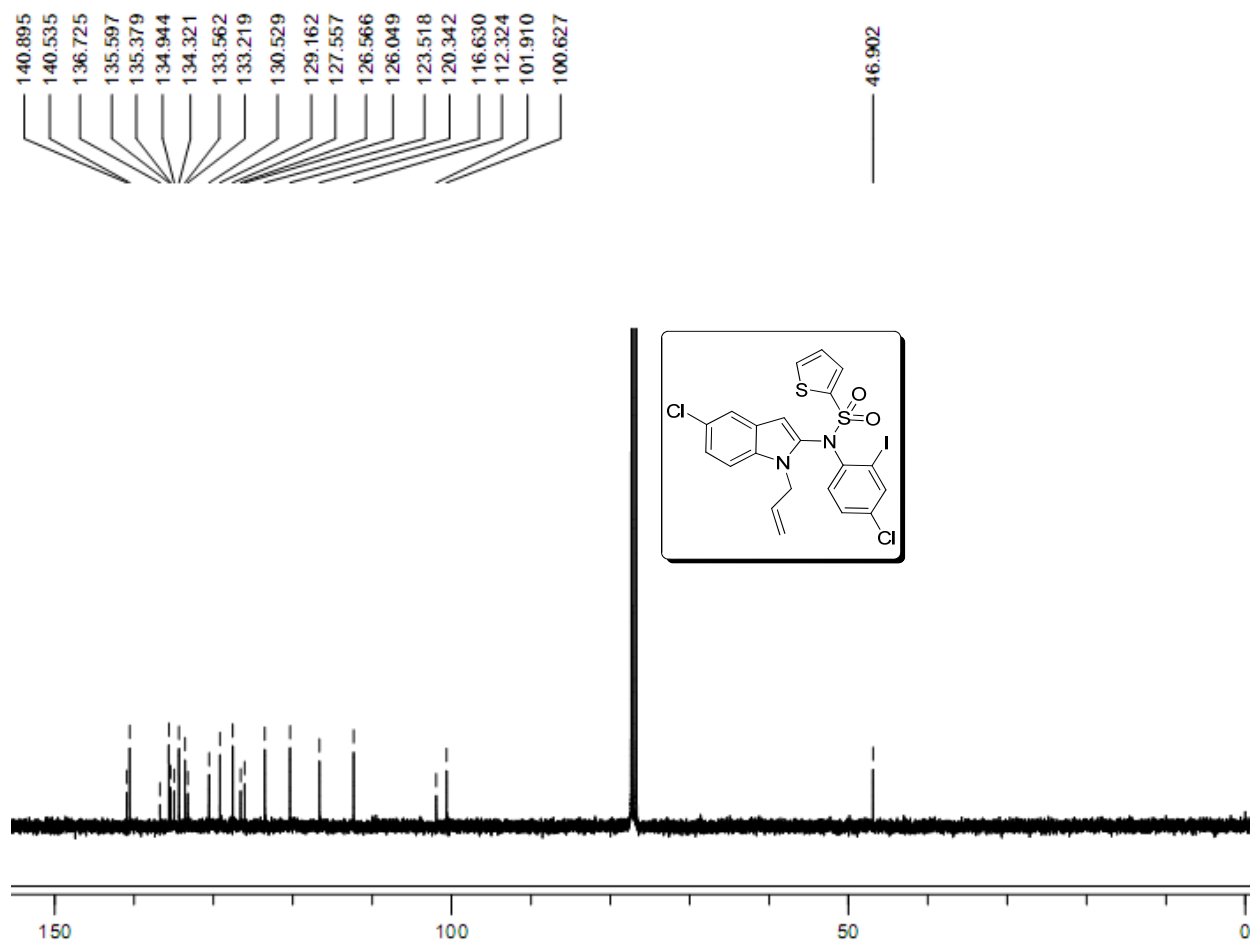

<sup>13</sup>C NMR spectrum (Varian, 100 MHz) of compound **3p** in CDCl<sub>3</sub>

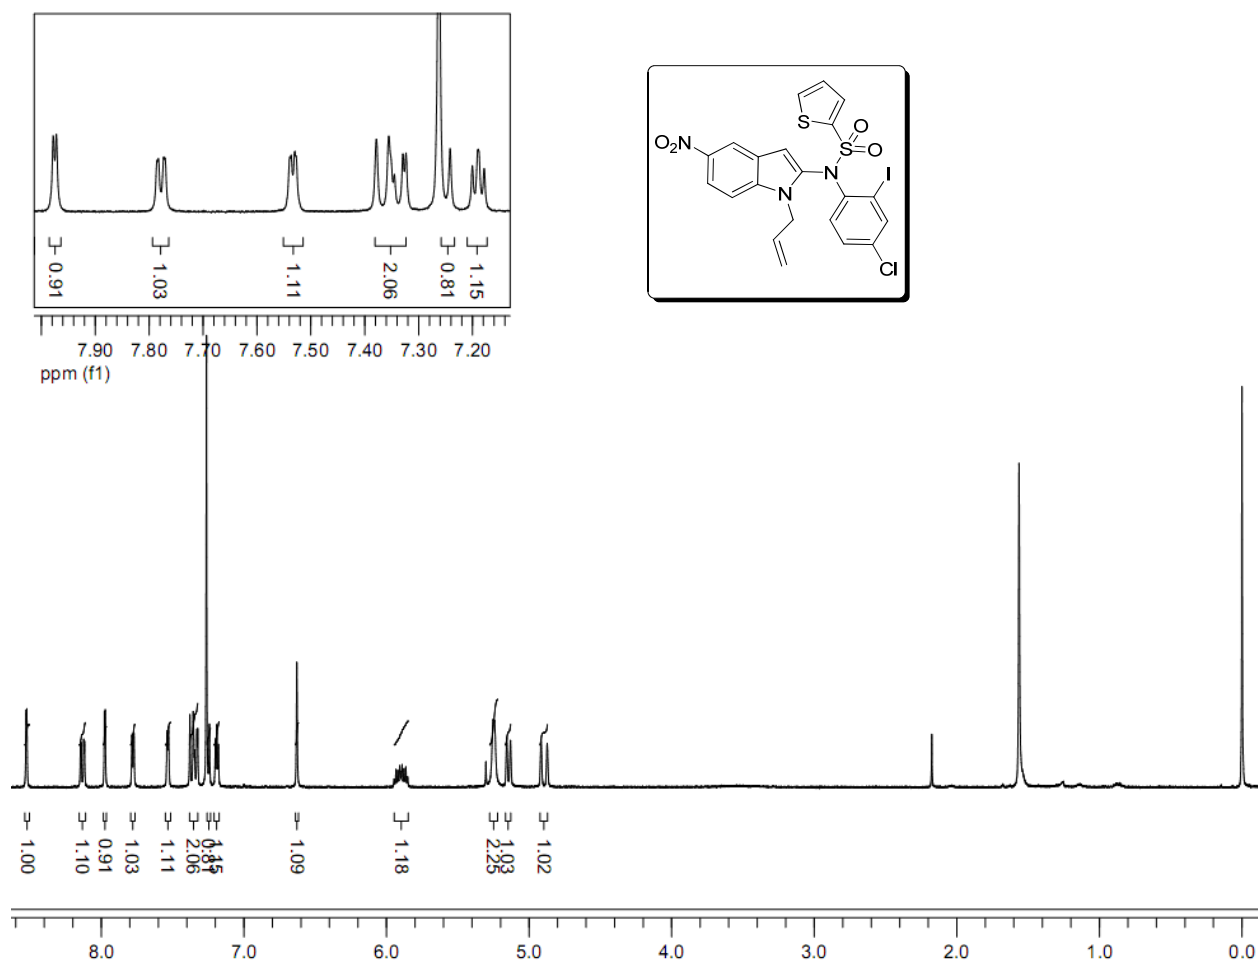

$^1\text{H}$  NMR (Varian, 400 MHz) spectrum of compound **3q** in  $\text{CDCl}_3$

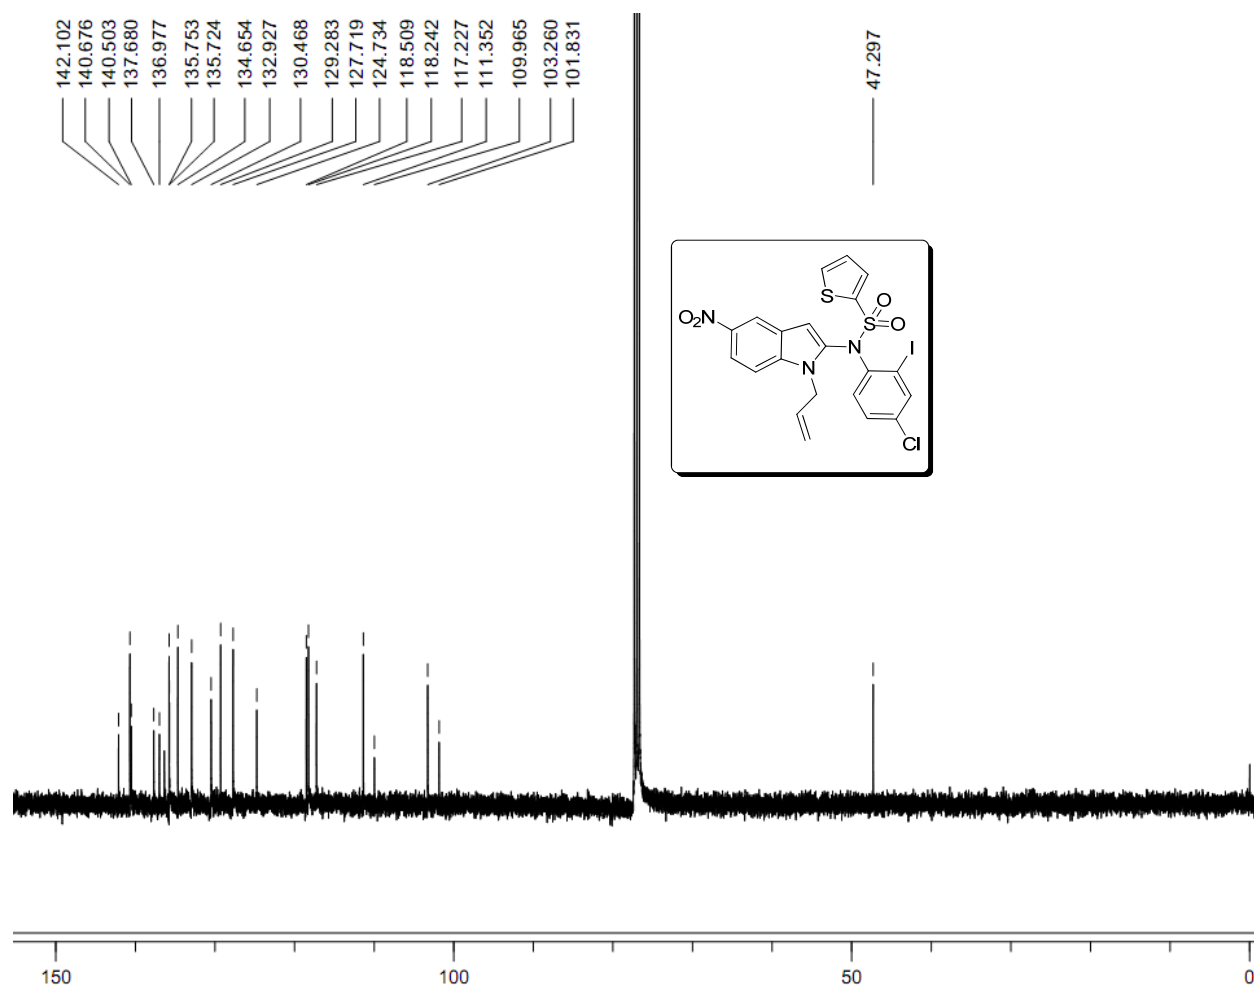

$^{13}\text{C}$  NMR spectrum (Varian, 100 MHz) of compound **3q** in  $\text{CDCl}_3$

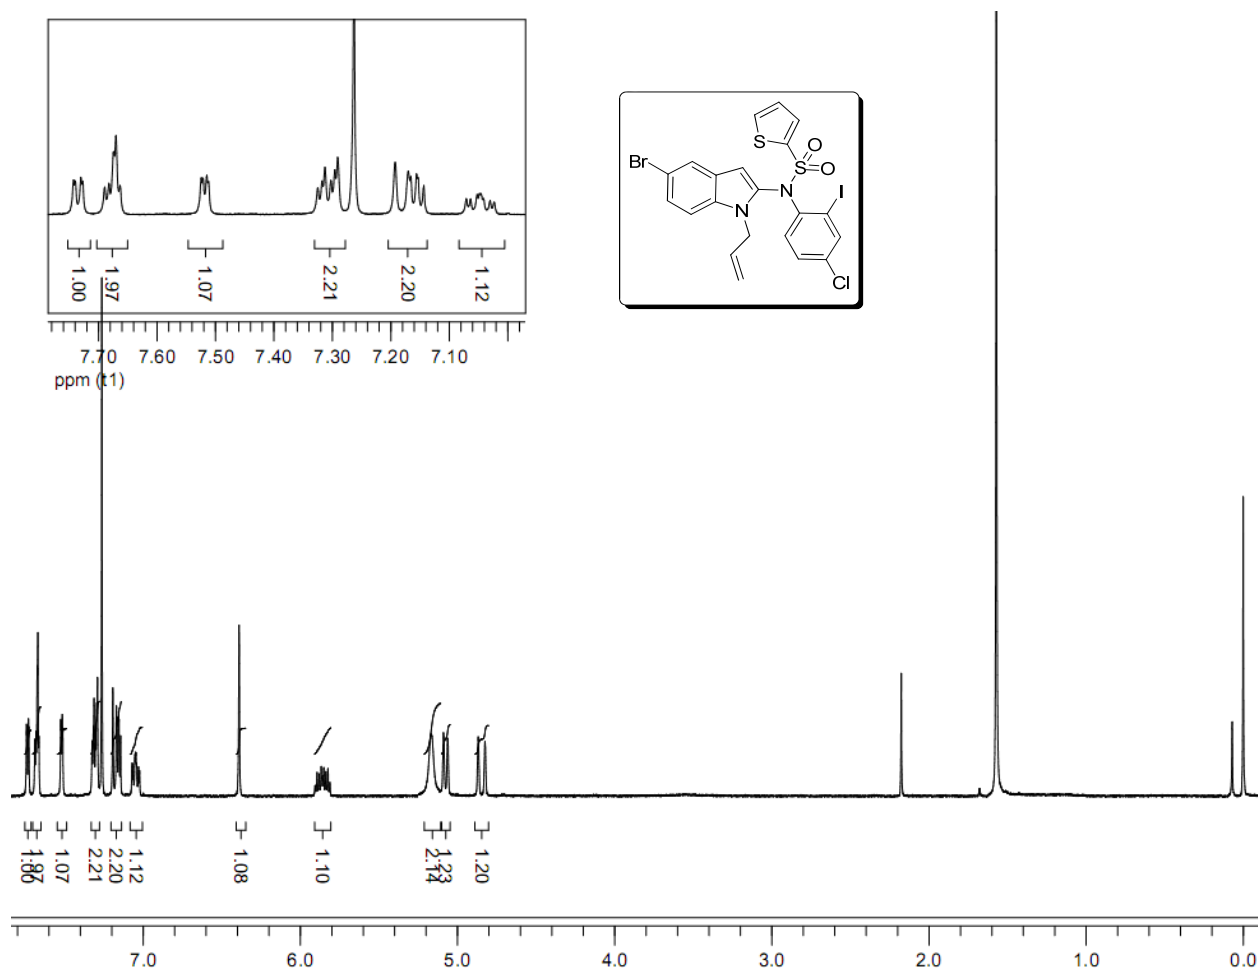

$^1\text{H}$  NMR (Varian, 400 MHz) spectrum of compound **3r** in  $\text{CDCl}_3$

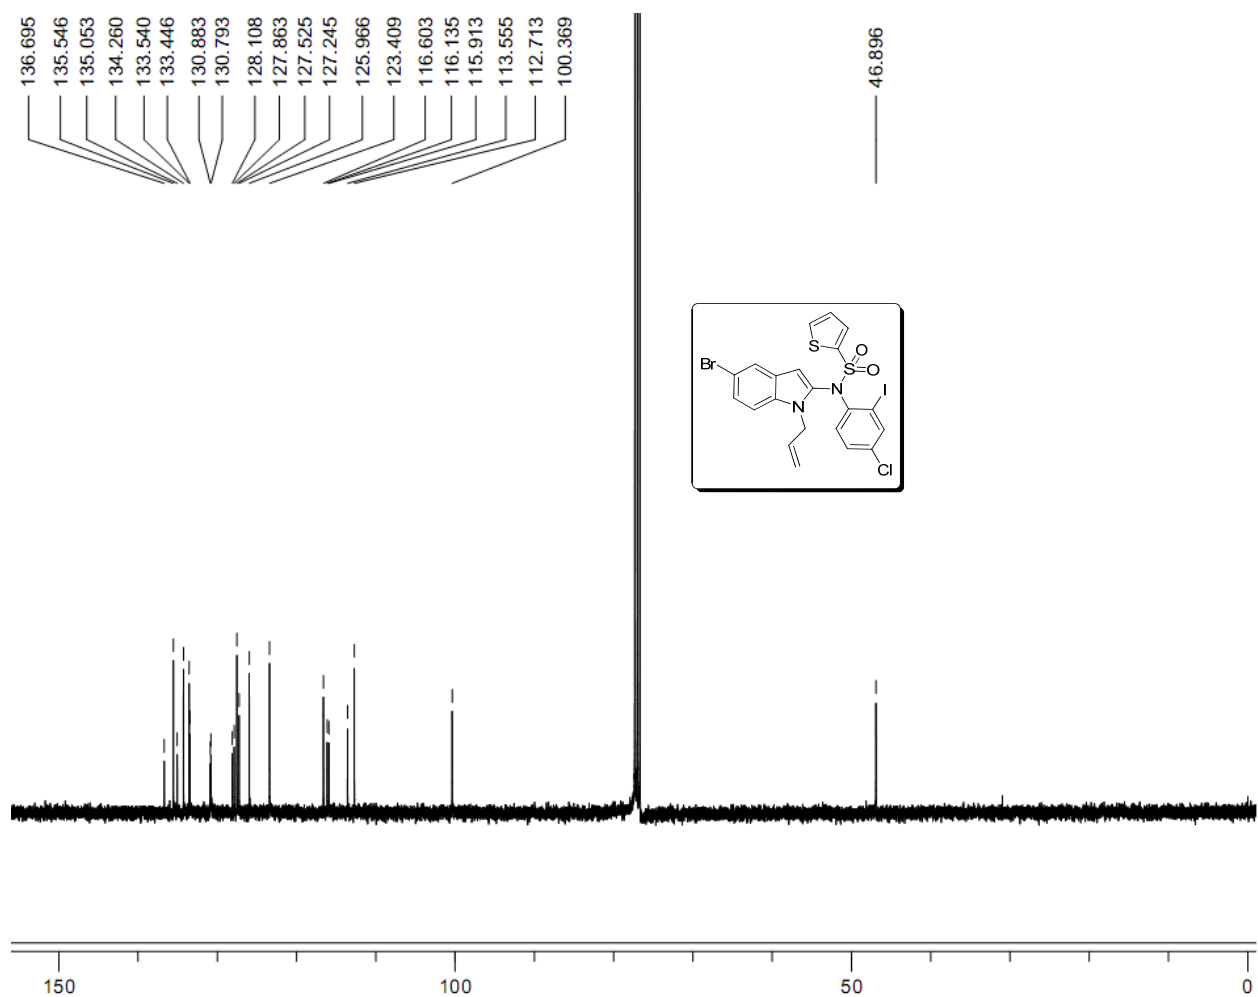

<sup>13</sup>C NMR spectrum (Varian, 100 MHz) of compound **3r** in CDCl<sub>3</sub>

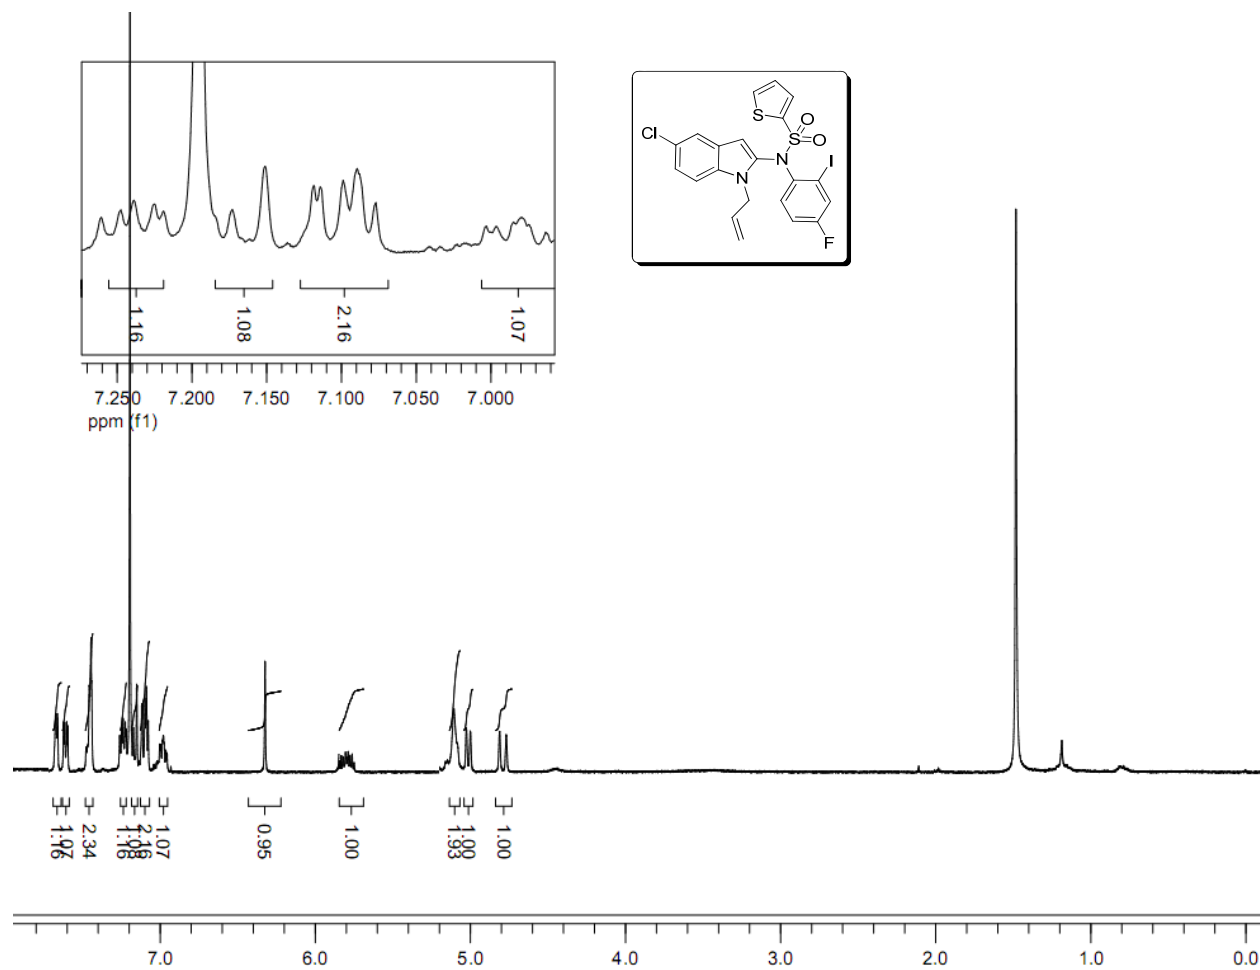

$^1\text{H}$  NMR (Varian, 400 MHz) spectrum of compound **3s** in  $\text{CDCl}_3$

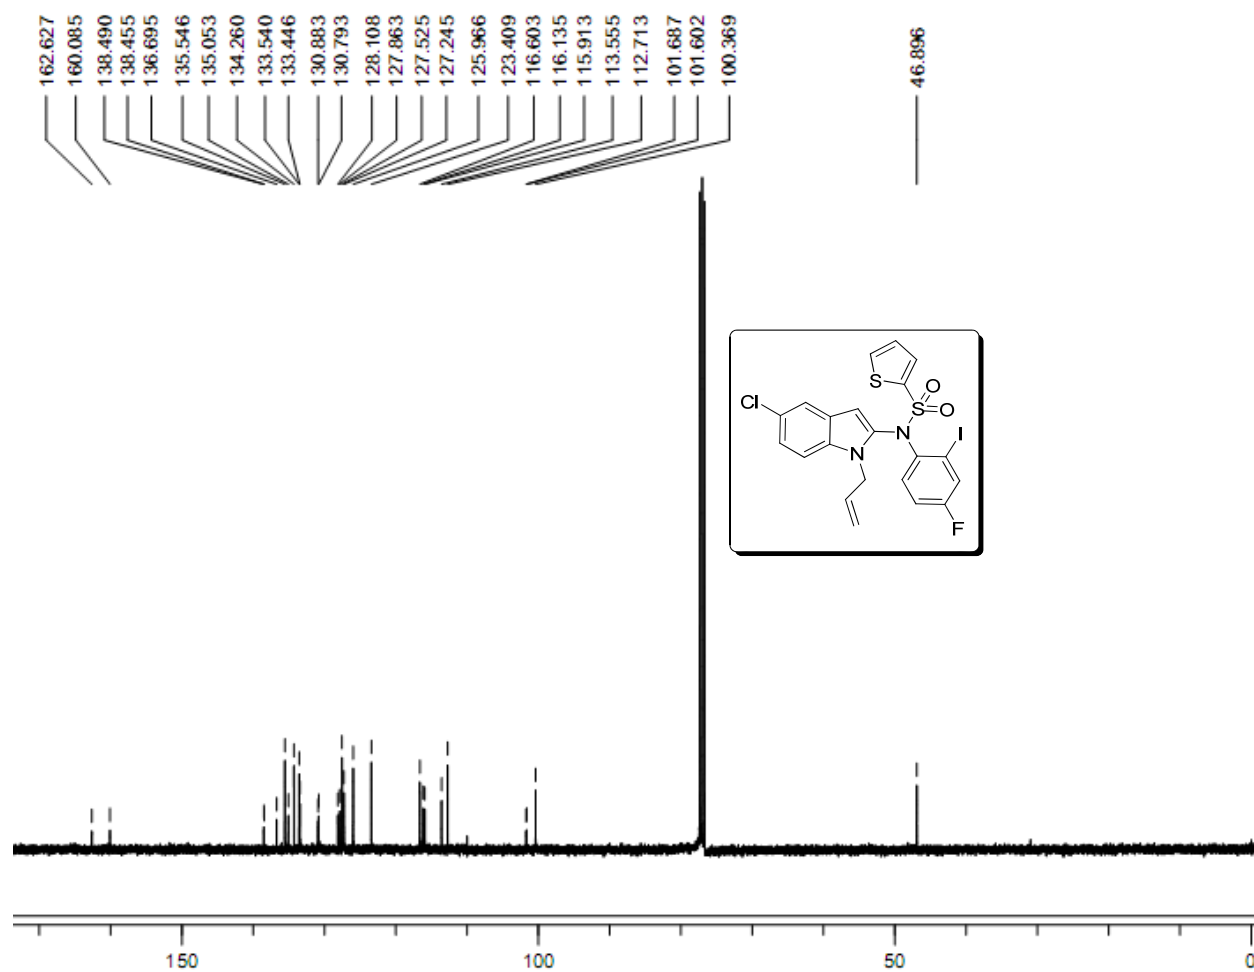

$^{13}\text{C}$  NMR spectrum (Varian, 100 MHz) of compound **3s** in  $\text{CDCl}_3$



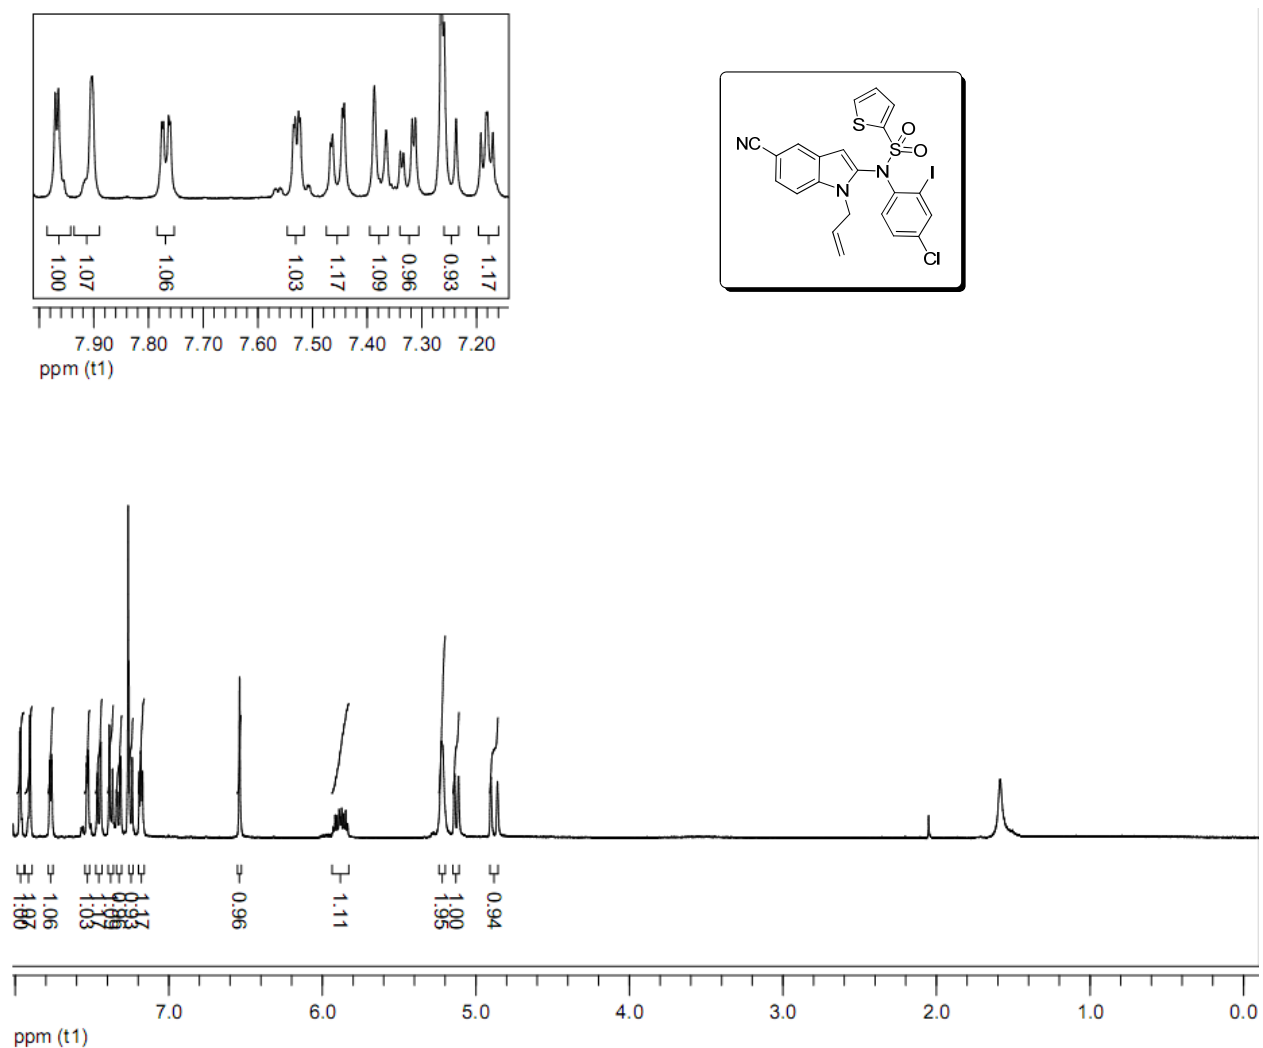

$^1\text{H}$  NMR (Varian, 400 MHz) spectrum of compound **3t** in  $\text{CDCl}_3$

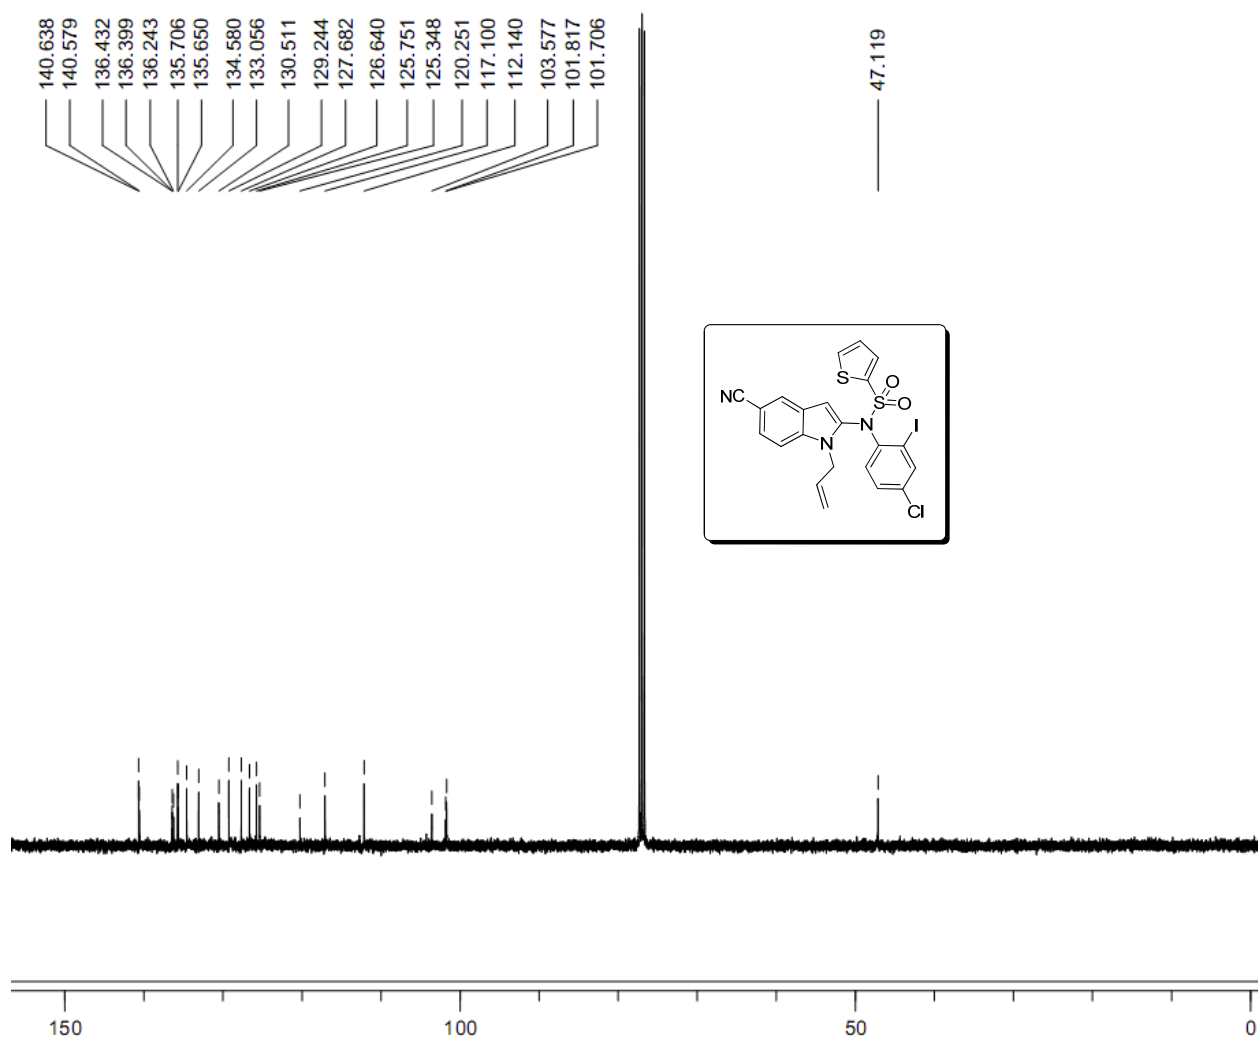

<sup>13</sup>C NMR spectrum (Varian, 100 MHz) of compound **3t** in CDCl<sub>3</sub>

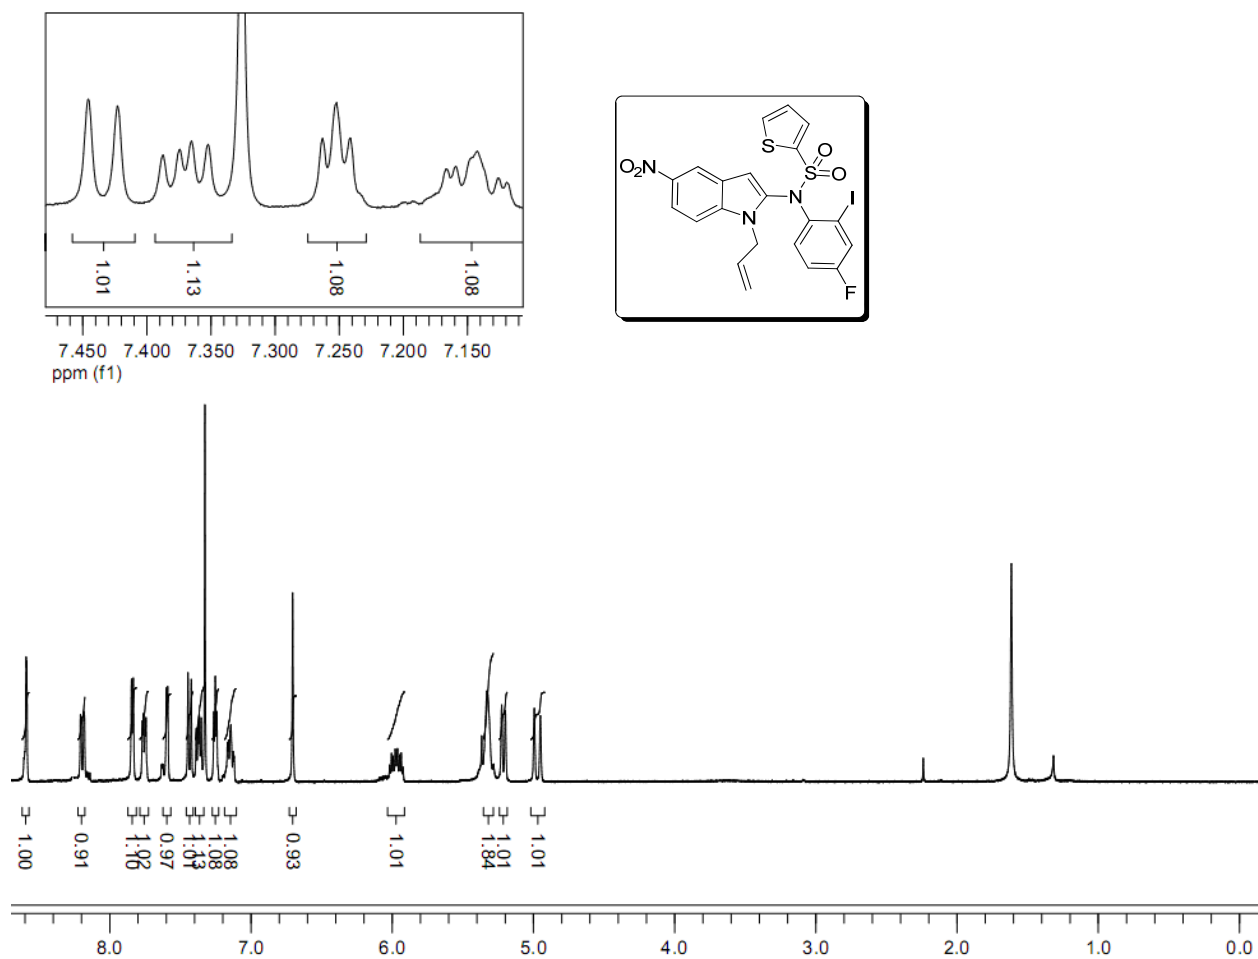

$^1\text{H}$  NMR (Varian, 400 MHz) spectrum of compound **3u** in  $\text{CDCl}_3$

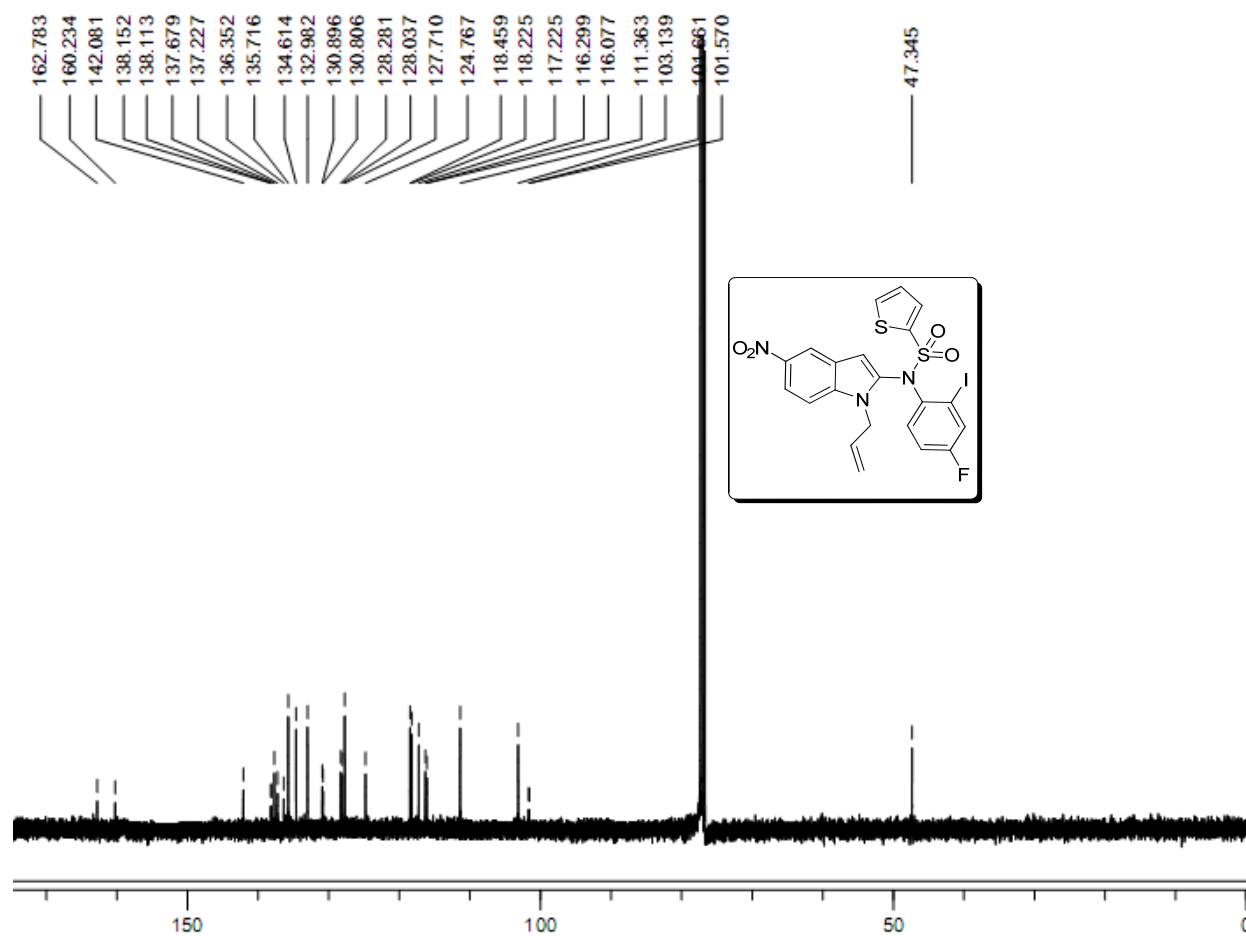

$^{13}\text{C}$  NMR spectrum (Varian, 100 MHz) of compound **3u** in  $\text{CDCl}_3$

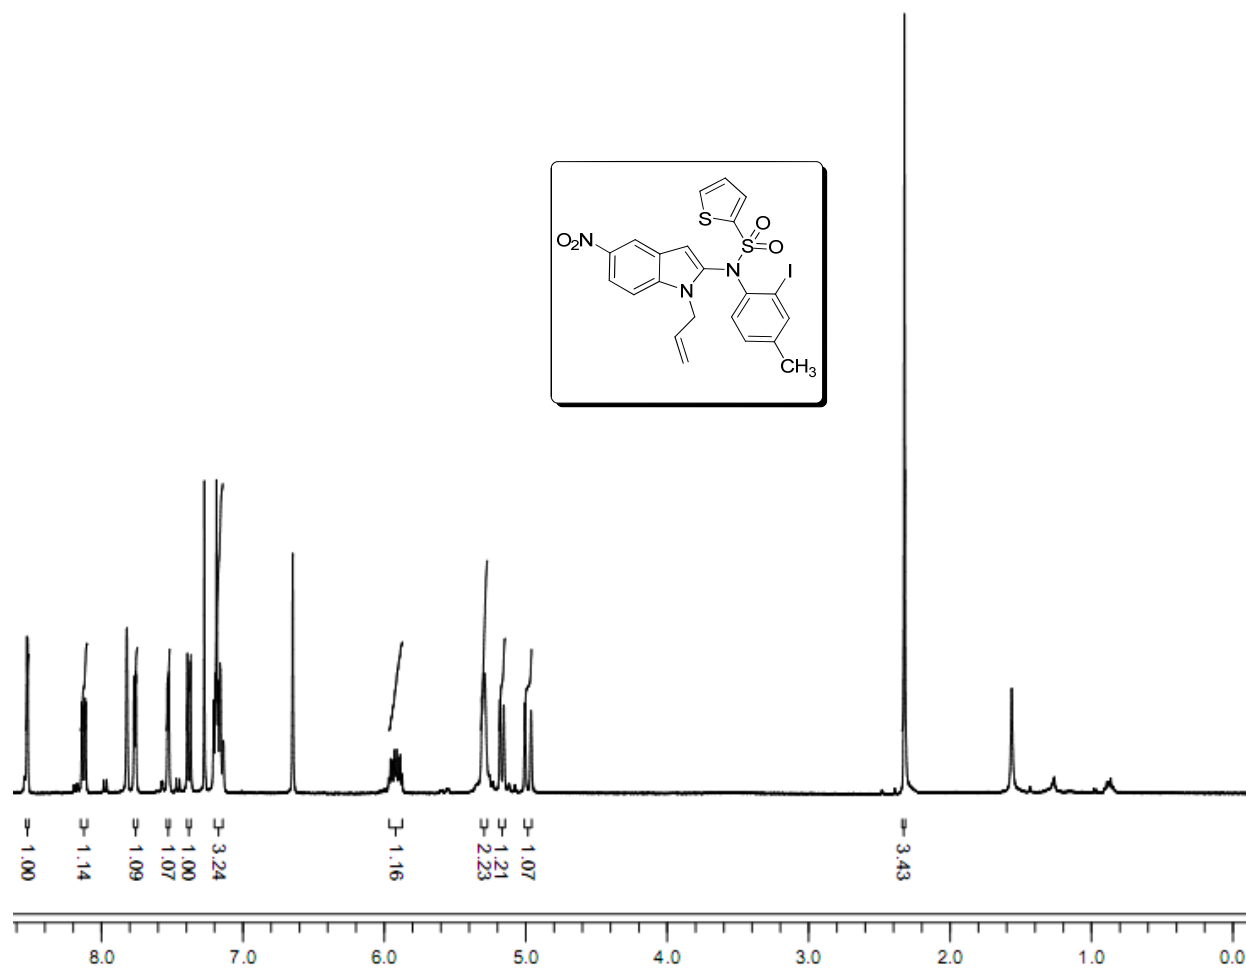

$^1\text{H}$  NMR (Varian, 400 MHz) spectrum of compound **3v** in  $\text{CDCl}_3$

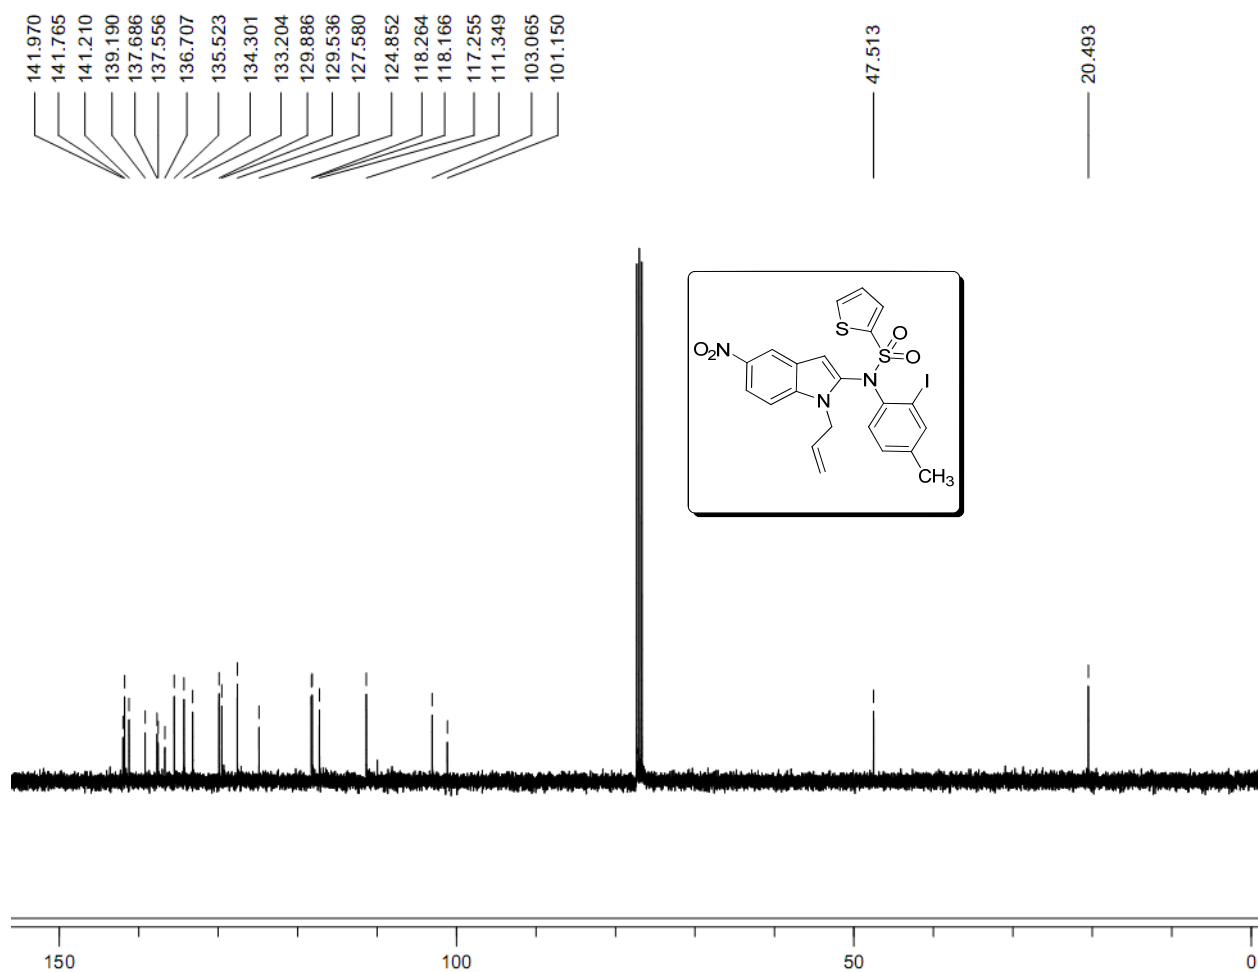

$^{13}\text{C}$  NMR spectrum (Varian, 100 MHz) of compound **3v** in  $\text{CDCl}_3$

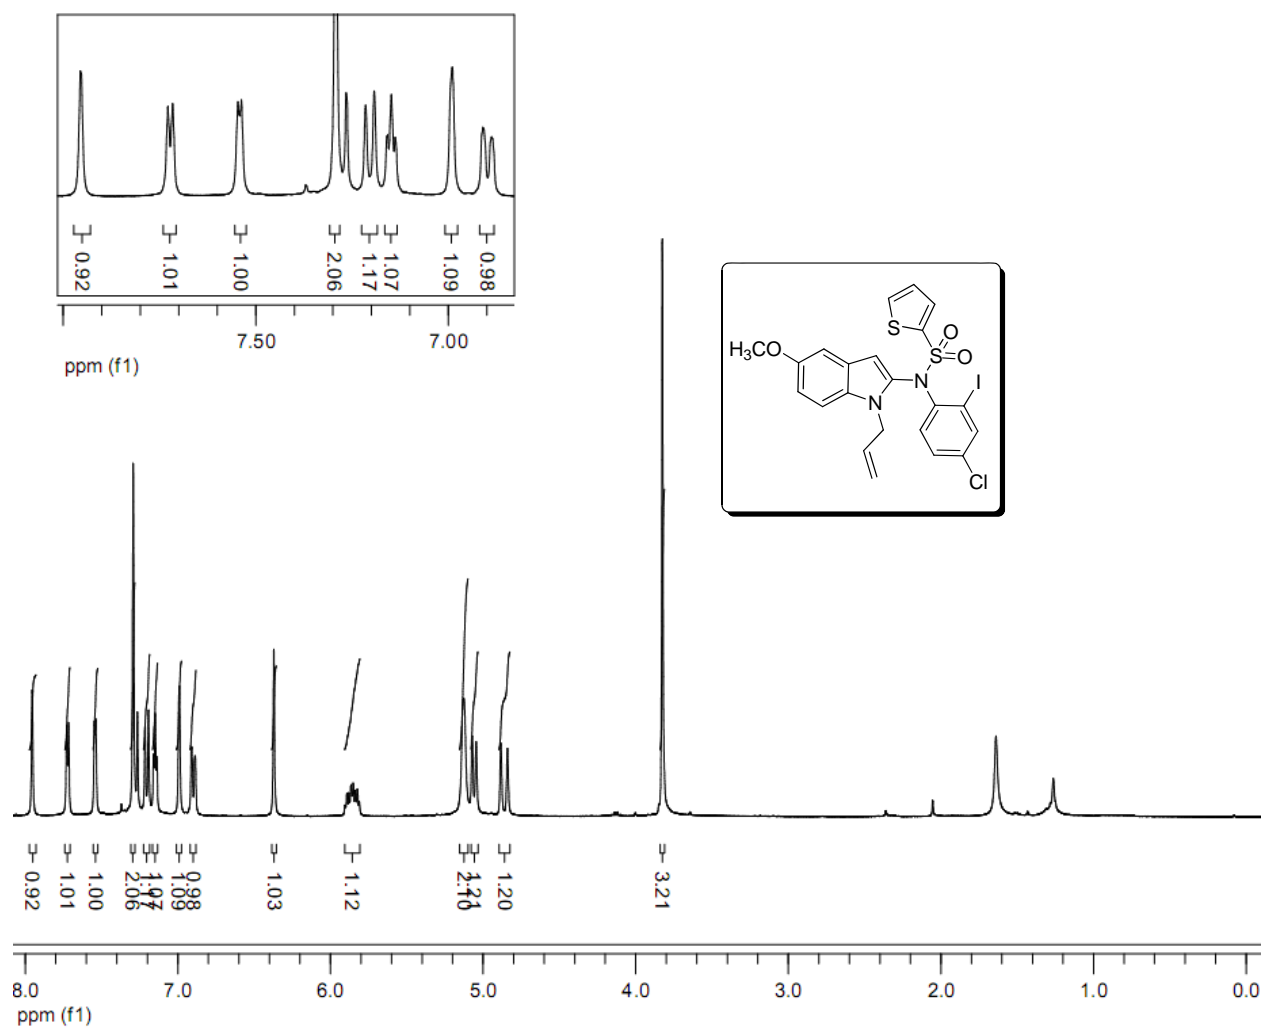

$^1\text{H}$  NMR (Varian, 400 MHz) spectrum of compound **3w** in  $\text{CDCl}_3$

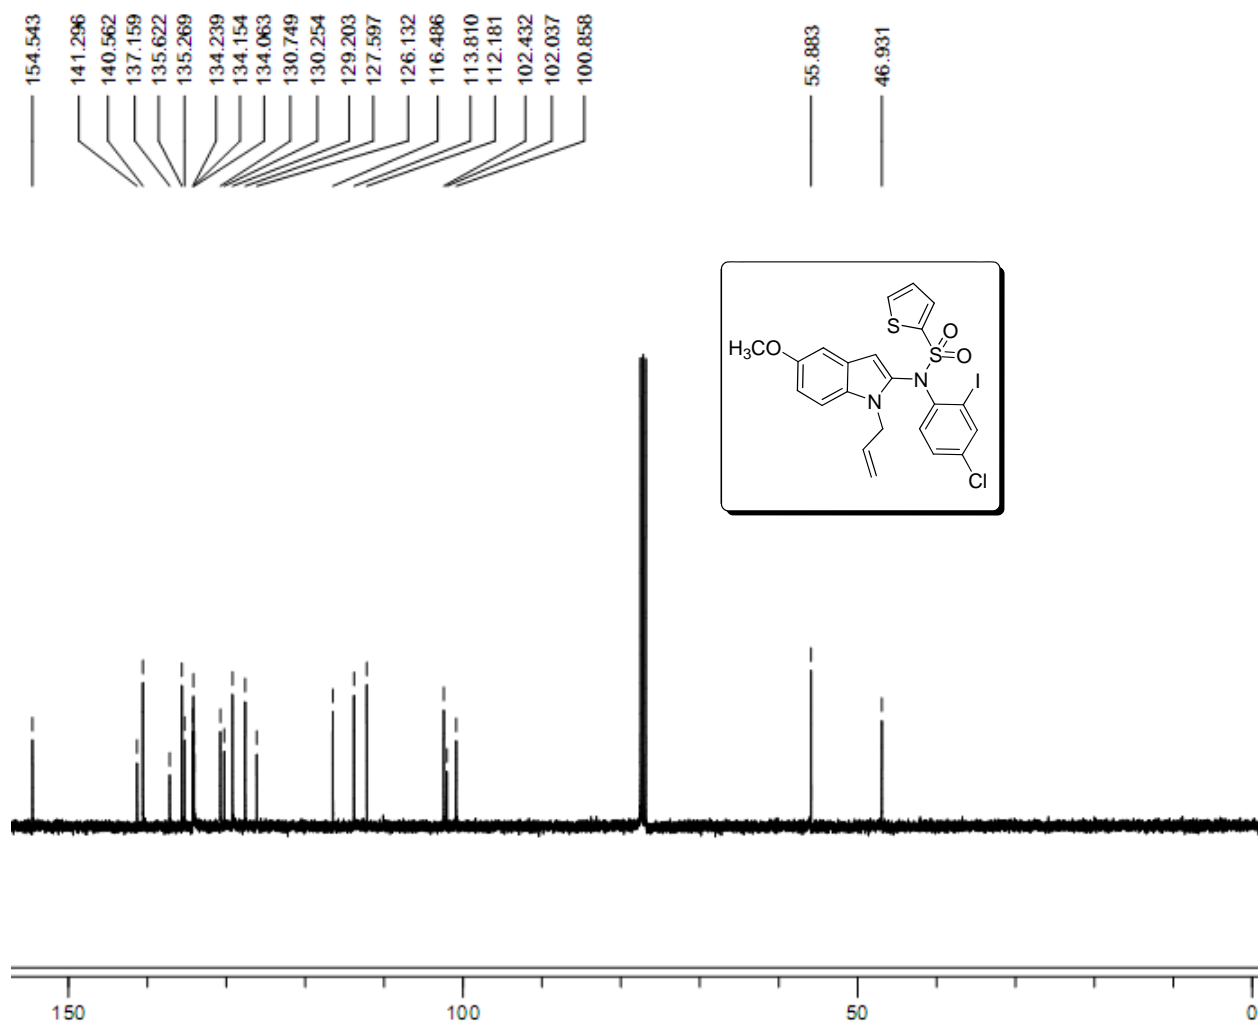

$^{13}\text{C}$  NMR spectrum (Varian, 100 MHz) of compound **3w** in  $\text{CDCl}_3$



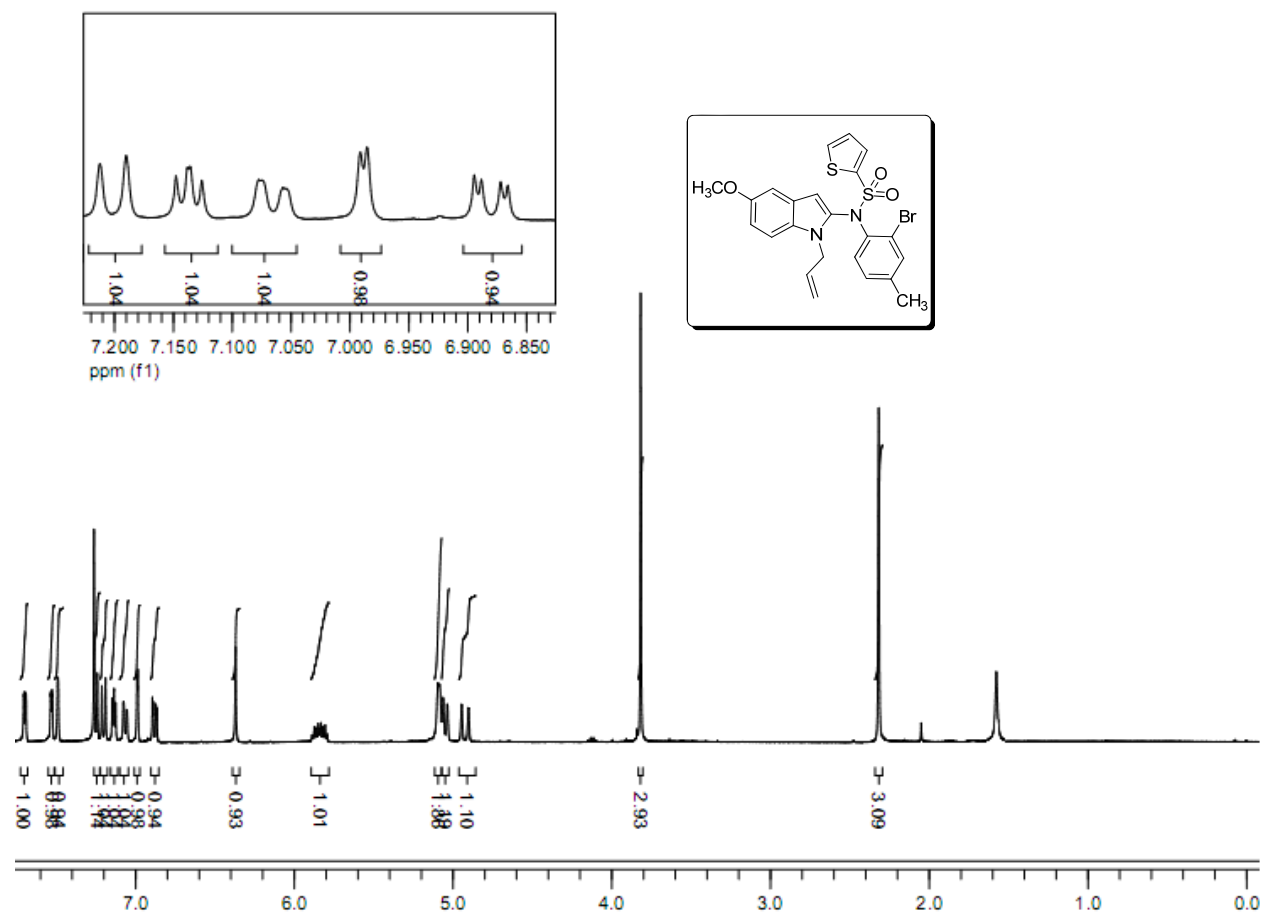

$^1\text{H}$  NMR (Varian, 400 MHz) spectrum of compound **3x** in  $\text{CDCl}_3$

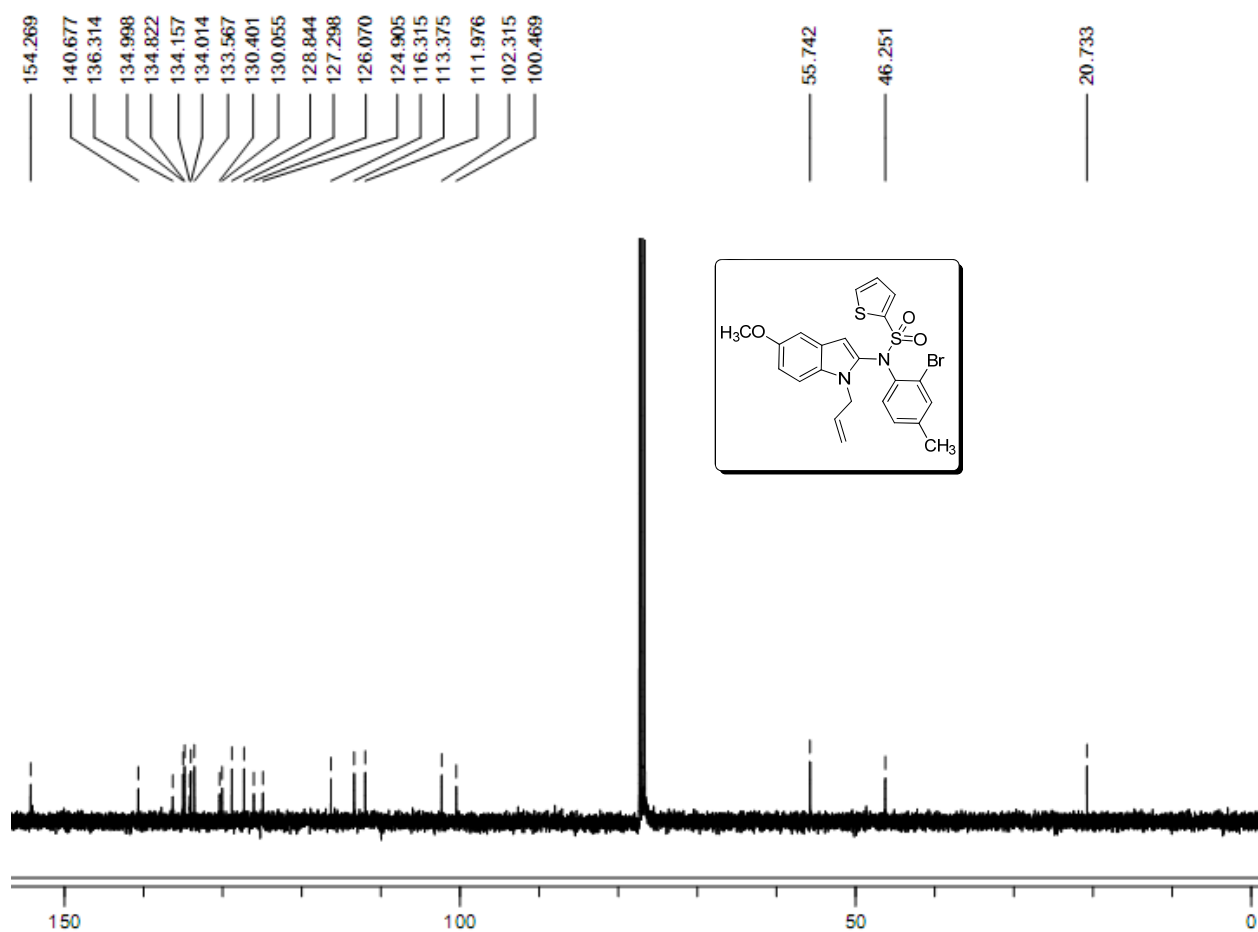

<sup>13</sup>C NMR spectrum (Varian, 100 MHz) of compound **3x** in CDCl<sub>3</sub>

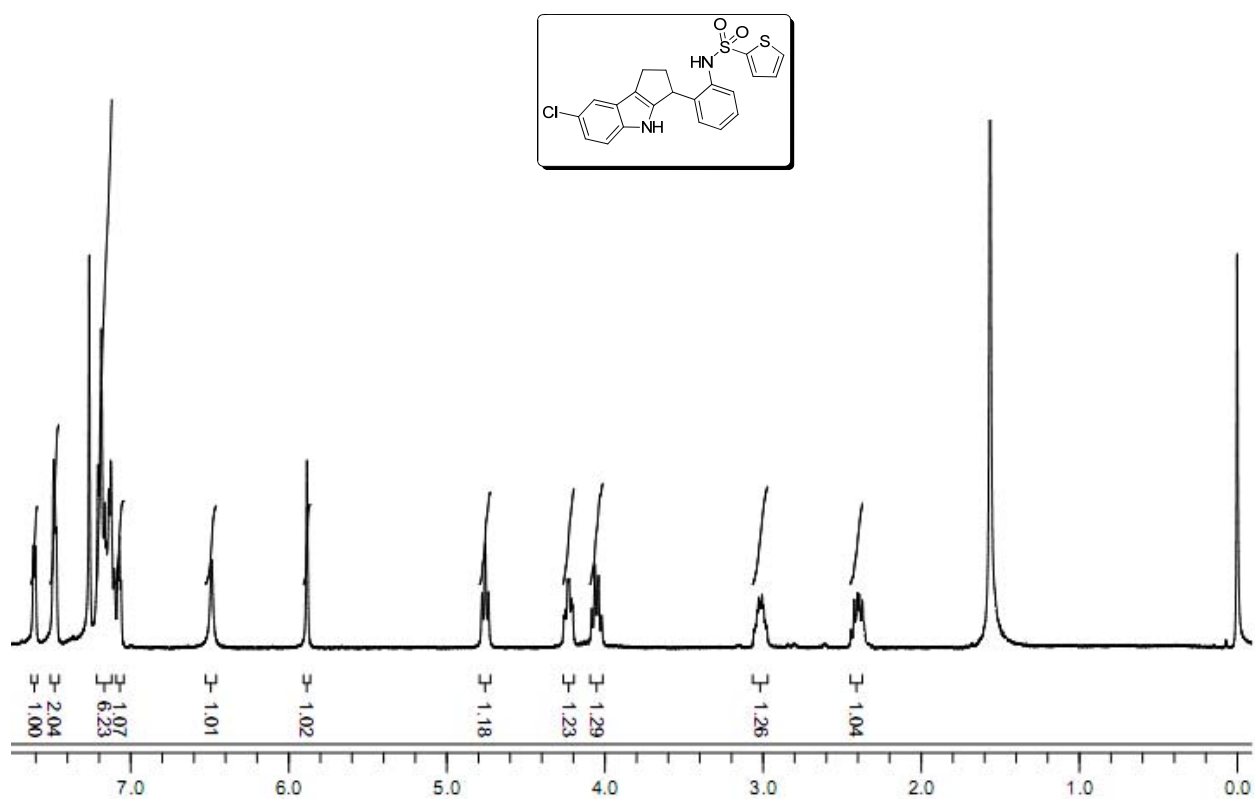

$^1\text{H}$  NMR (Varian, 400 MHz) spectrum of compound **4a** in  $\text{CDCl}_3$

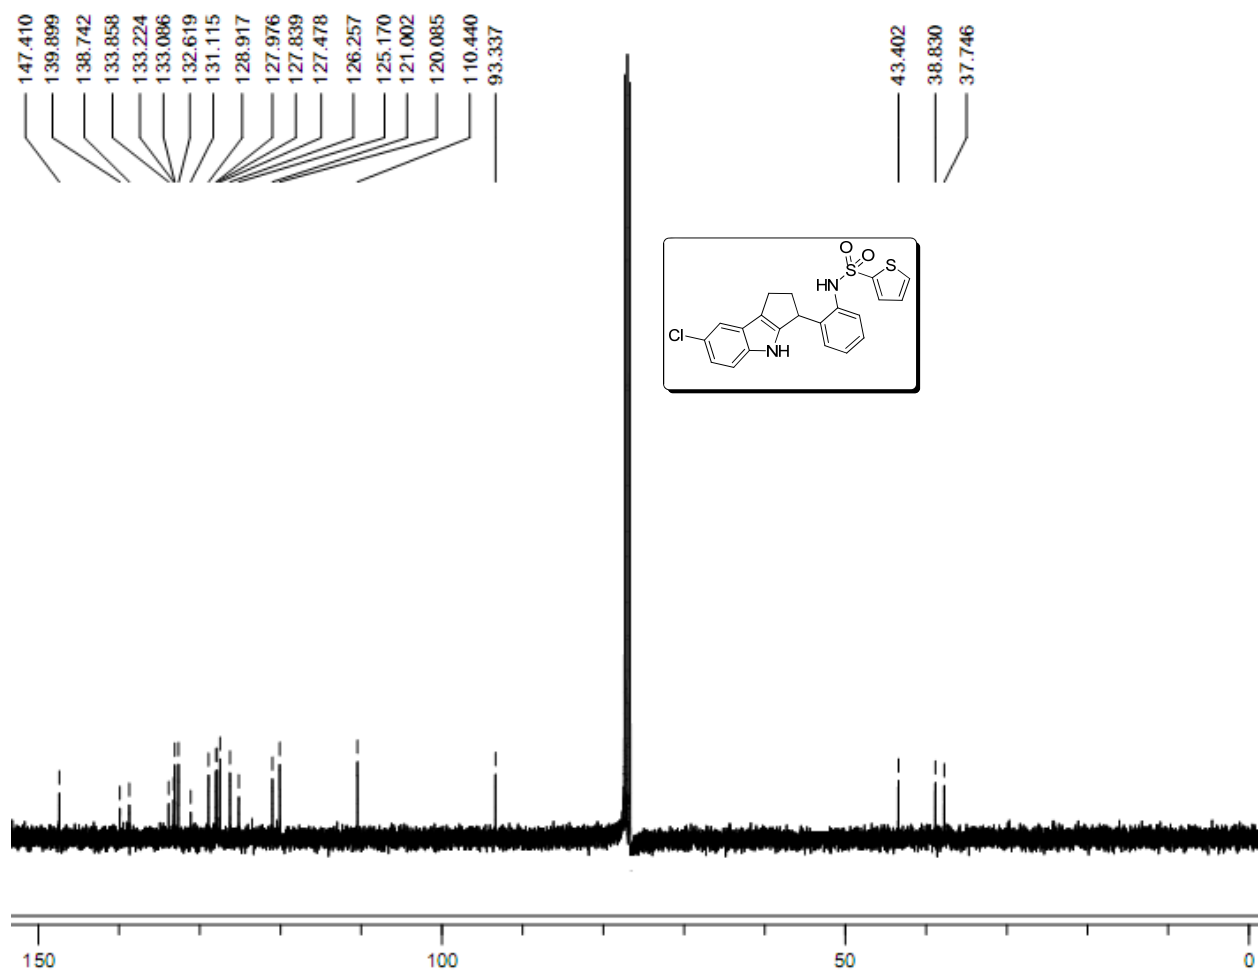

$^{13}\text{C}$  NMR spectrum (Varian, 100 MHz) of compound **4a** in  $\text{CDCl}_3$

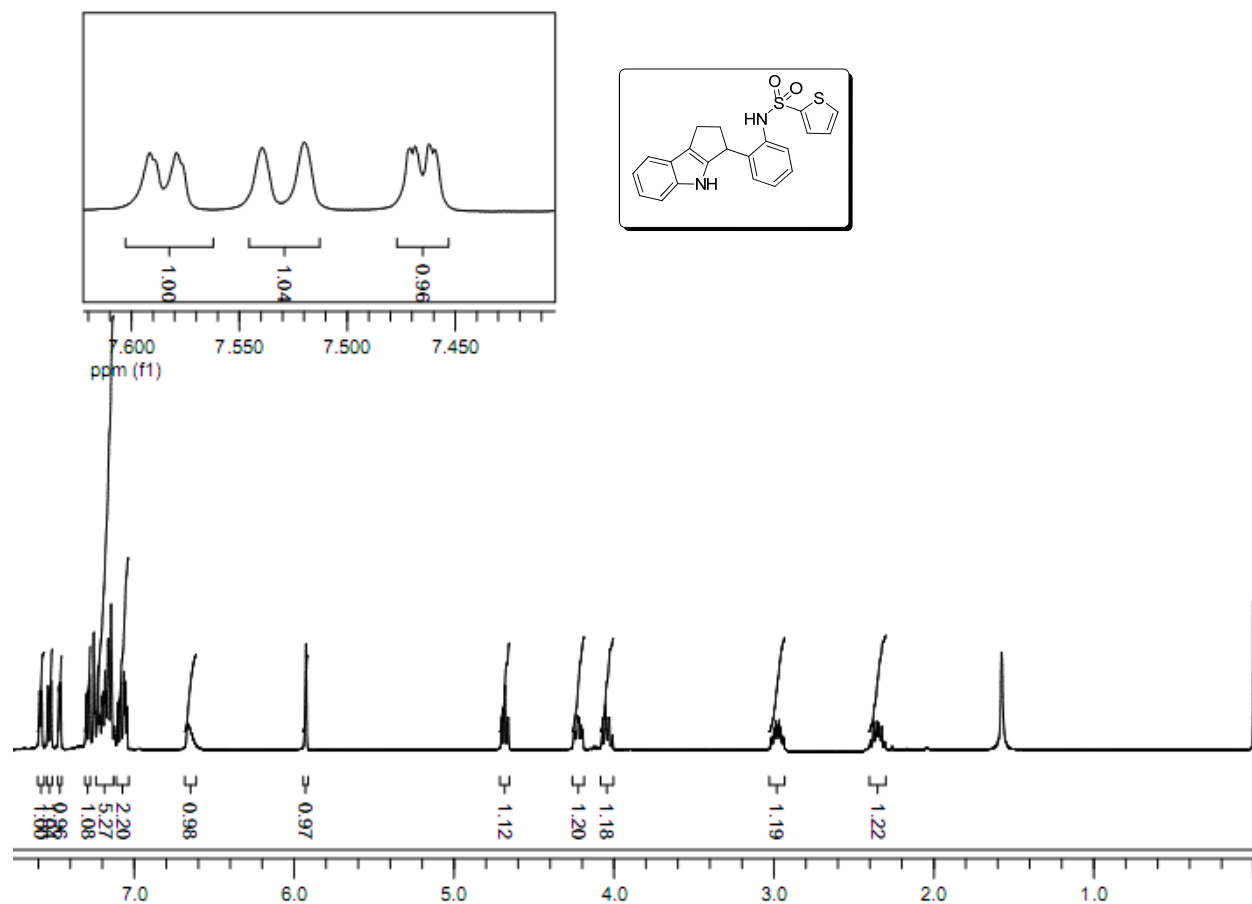

<sup>1</sup>H NMR (Varian, 400 MHz) spectrum of compound **4b** in CDCl<sub>3</sub>

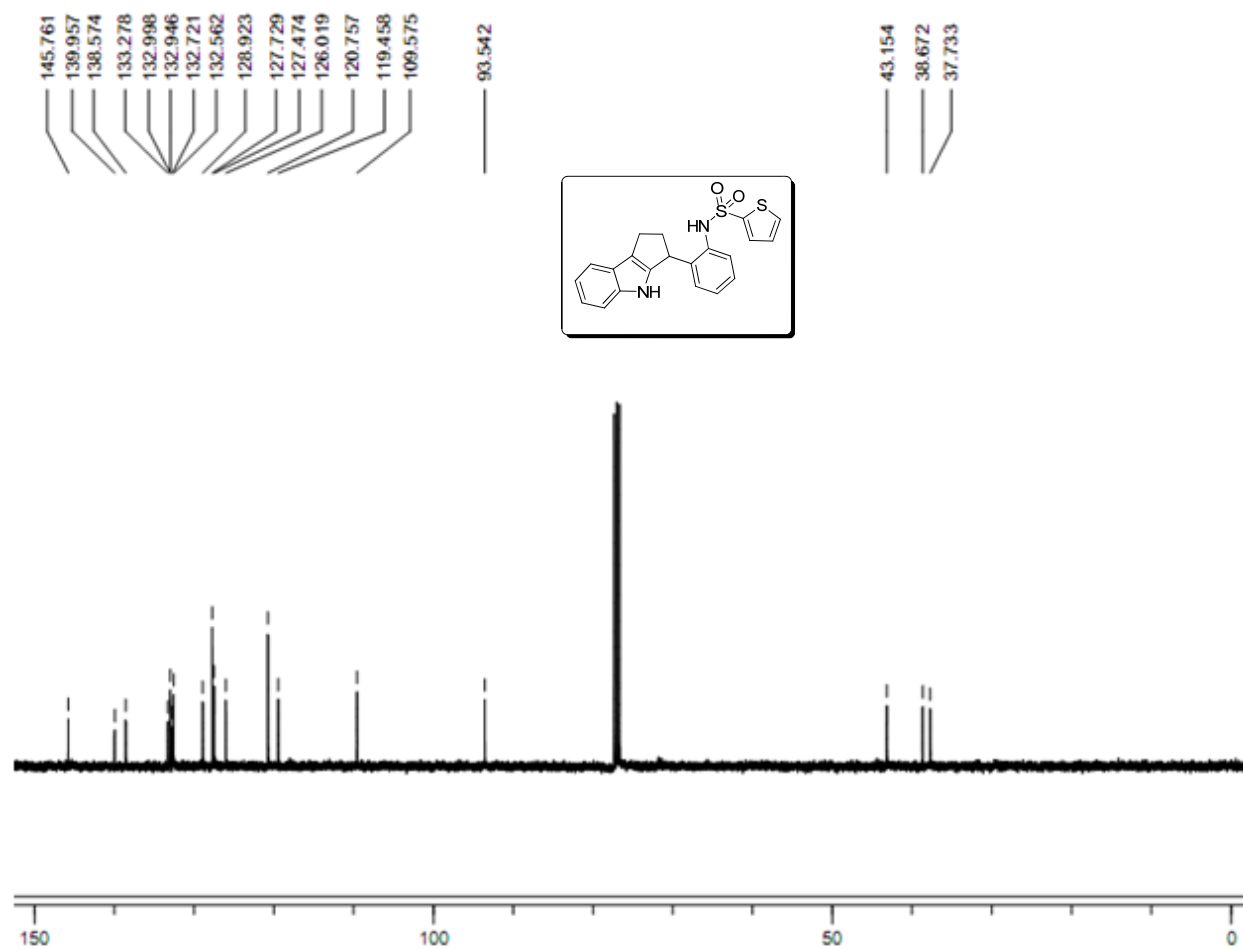

<sup>13</sup>C NMR spectrum (Varian, 100 MHz) of compound **4b** in CDCl<sub>3</sub>

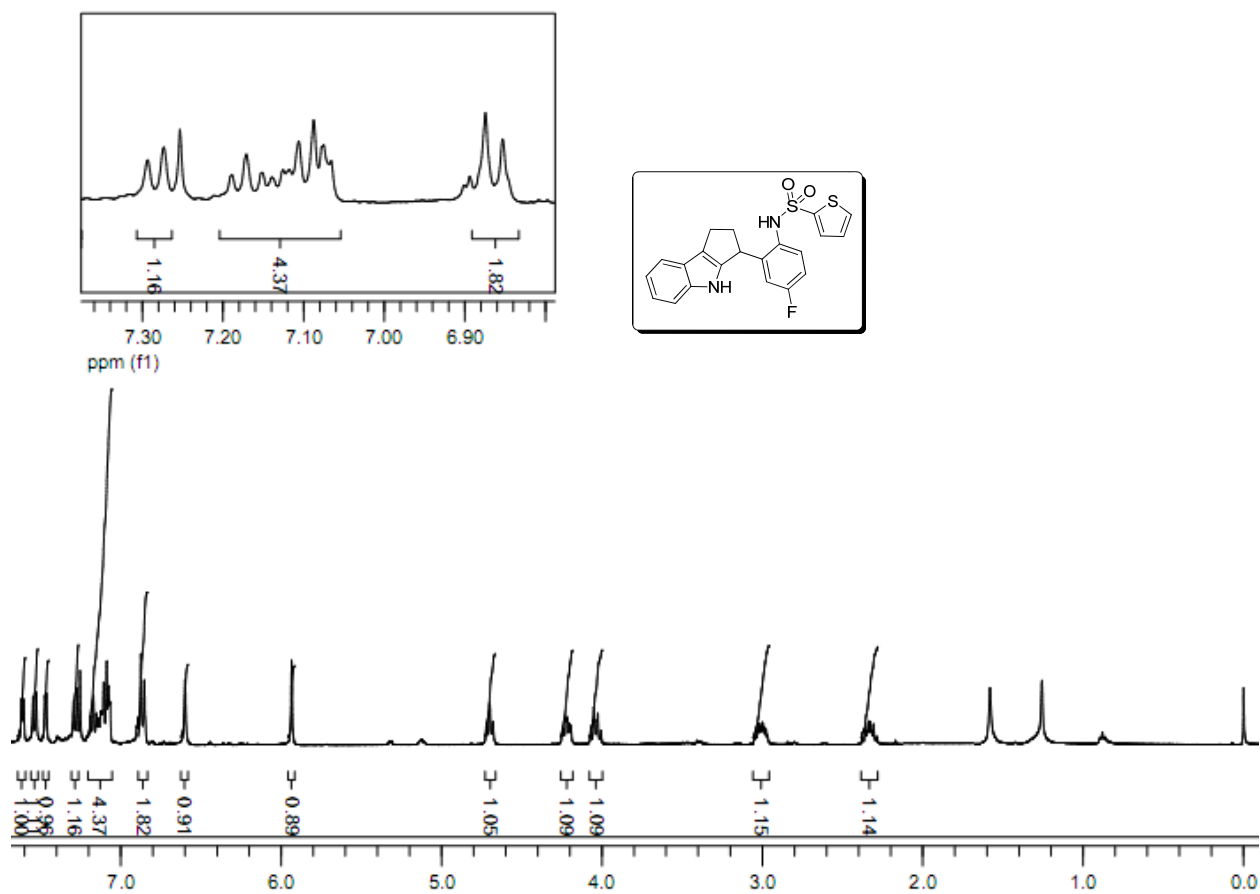

$^1\text{H}$  NMR (Varian, 400 MHz) spectrum of compound **4c** in  $\text{CDCl}_3$

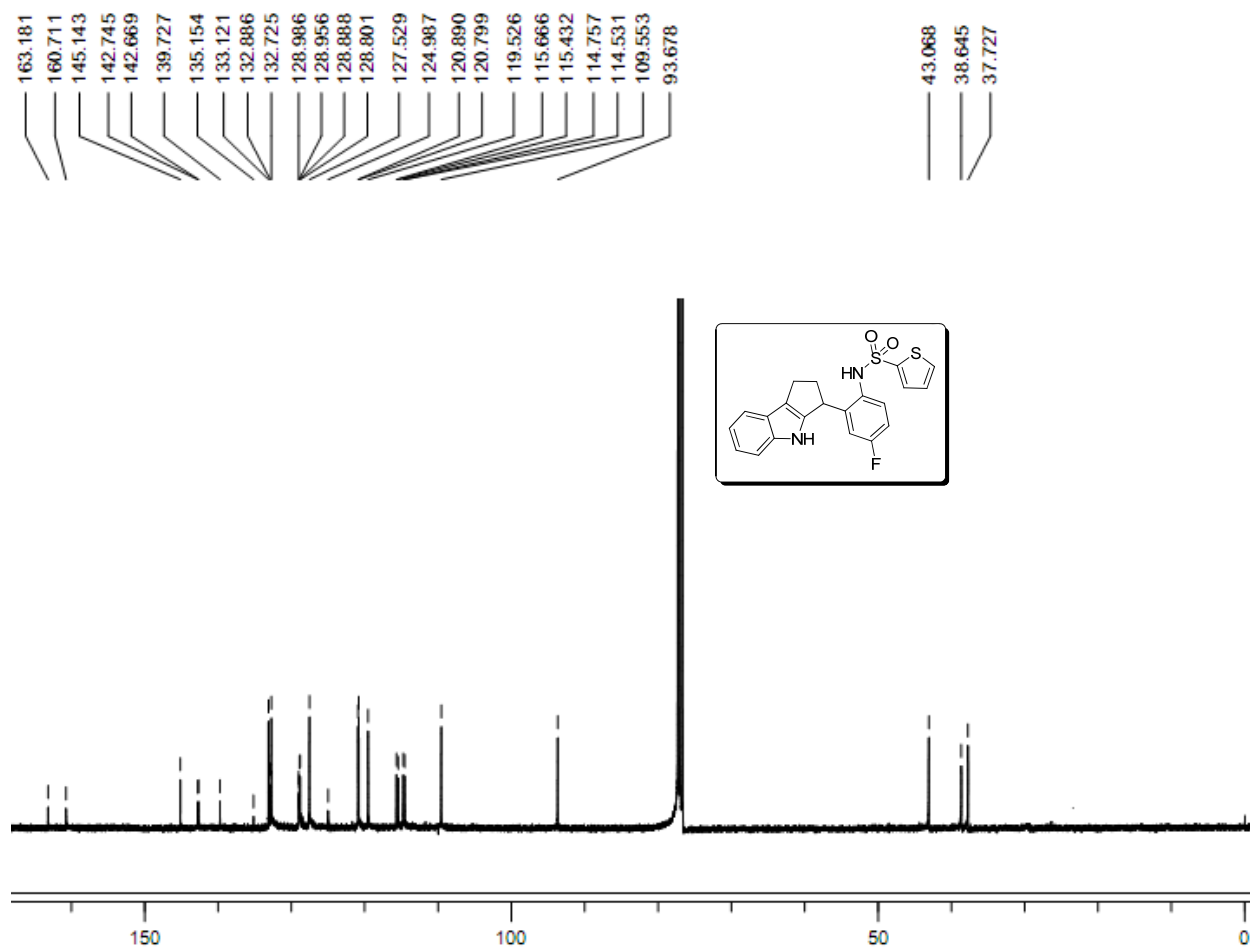

$^{13}\text{C}$  NMR spectrum (Varian, 100 MHz) of compound **4c** in  $\text{CDCl}_3$



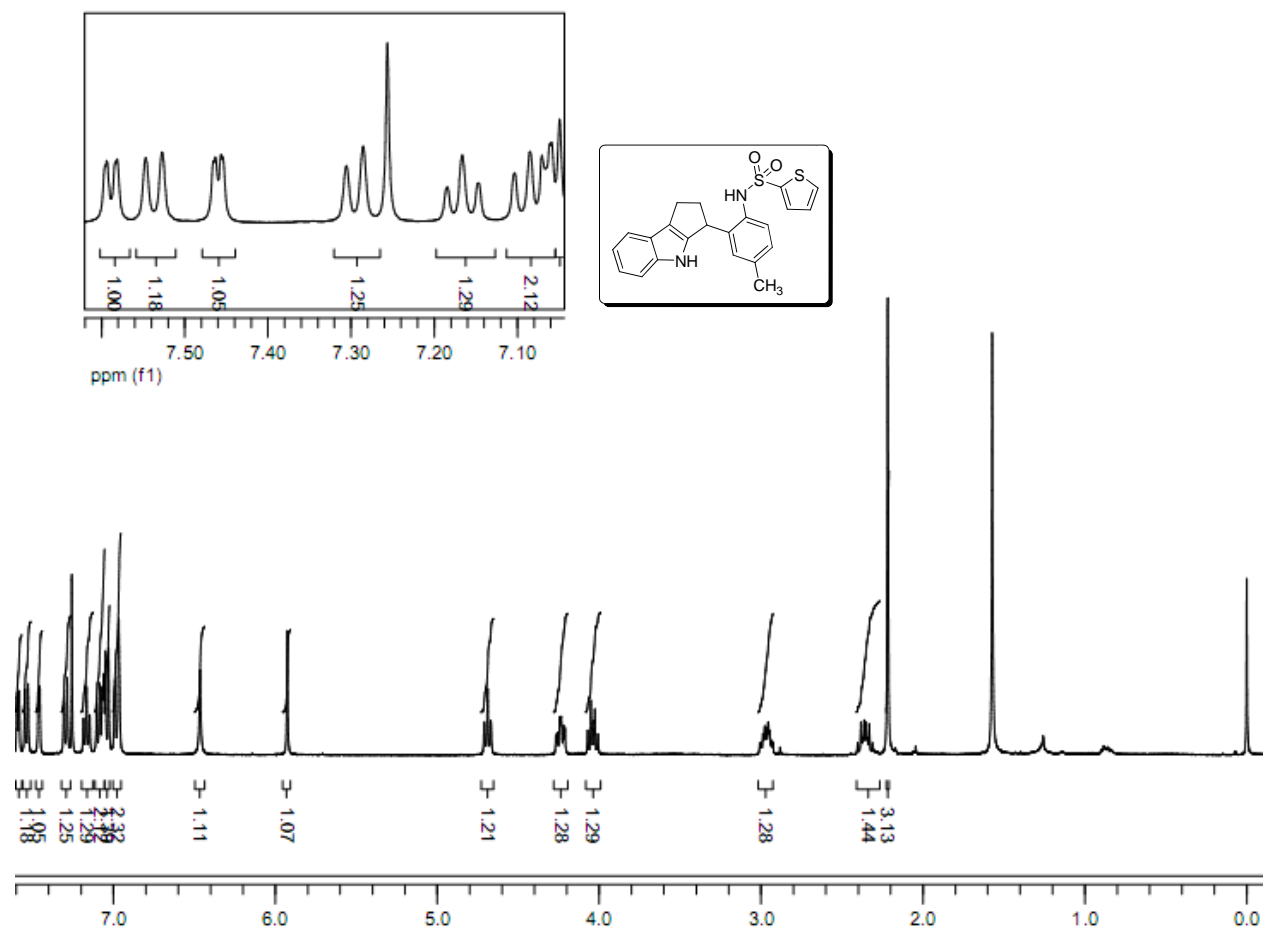

$^1\text{H}$  NMR (Varian, 400 MHz) spectrum of compound **4d** in  $\text{CDCl}_3$

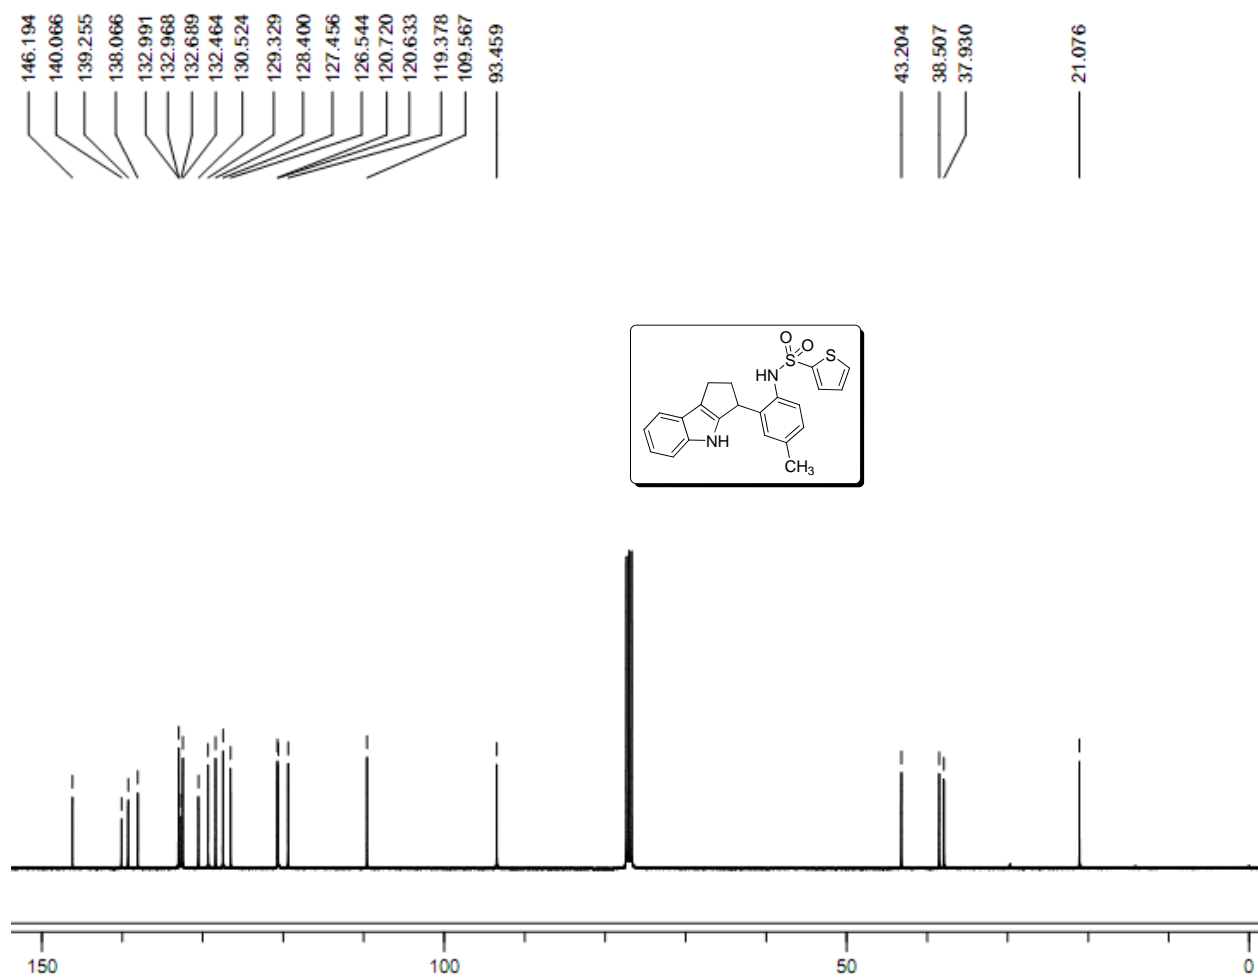

$^{13}\text{C}$  NMR spectrum (Varian, 100 MHz) of compound **4d** in  $\text{CDCl}_3$

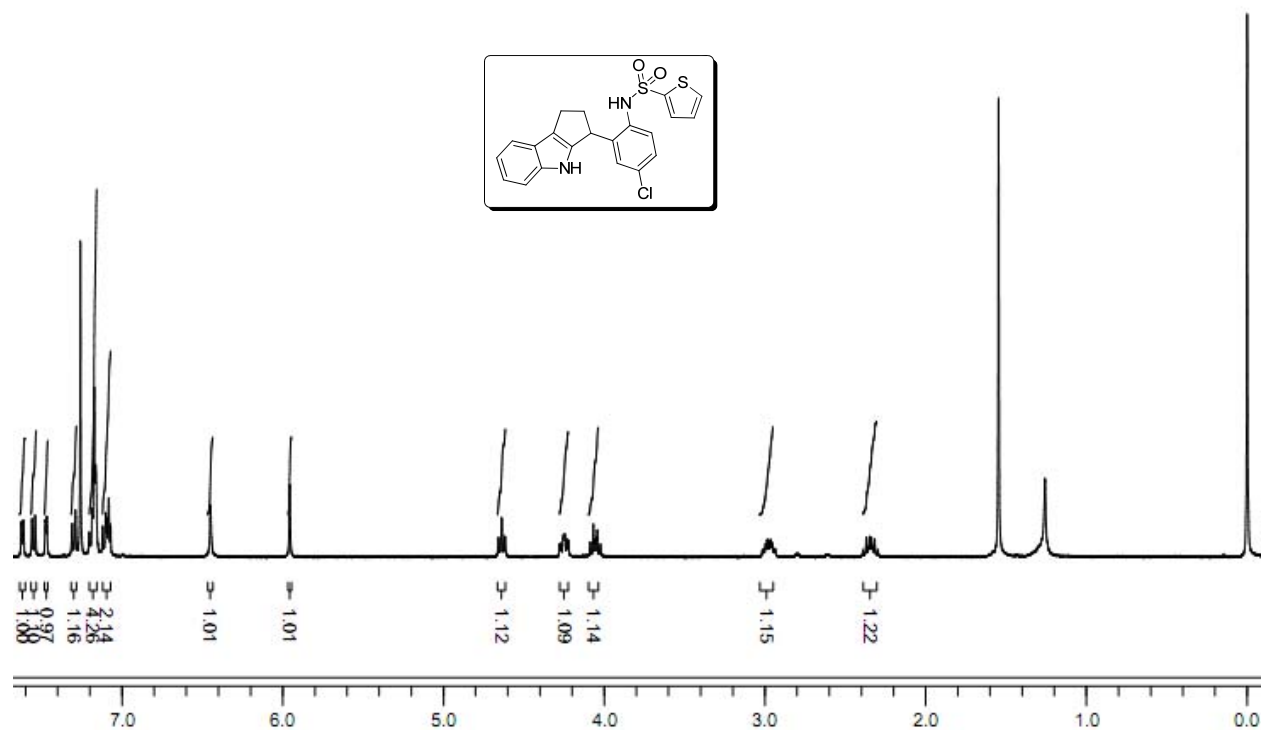

<sup>1</sup>H NMR (Varian, 400 MHz) spectrum of compound **4e** in CDCl<sub>3</sub>

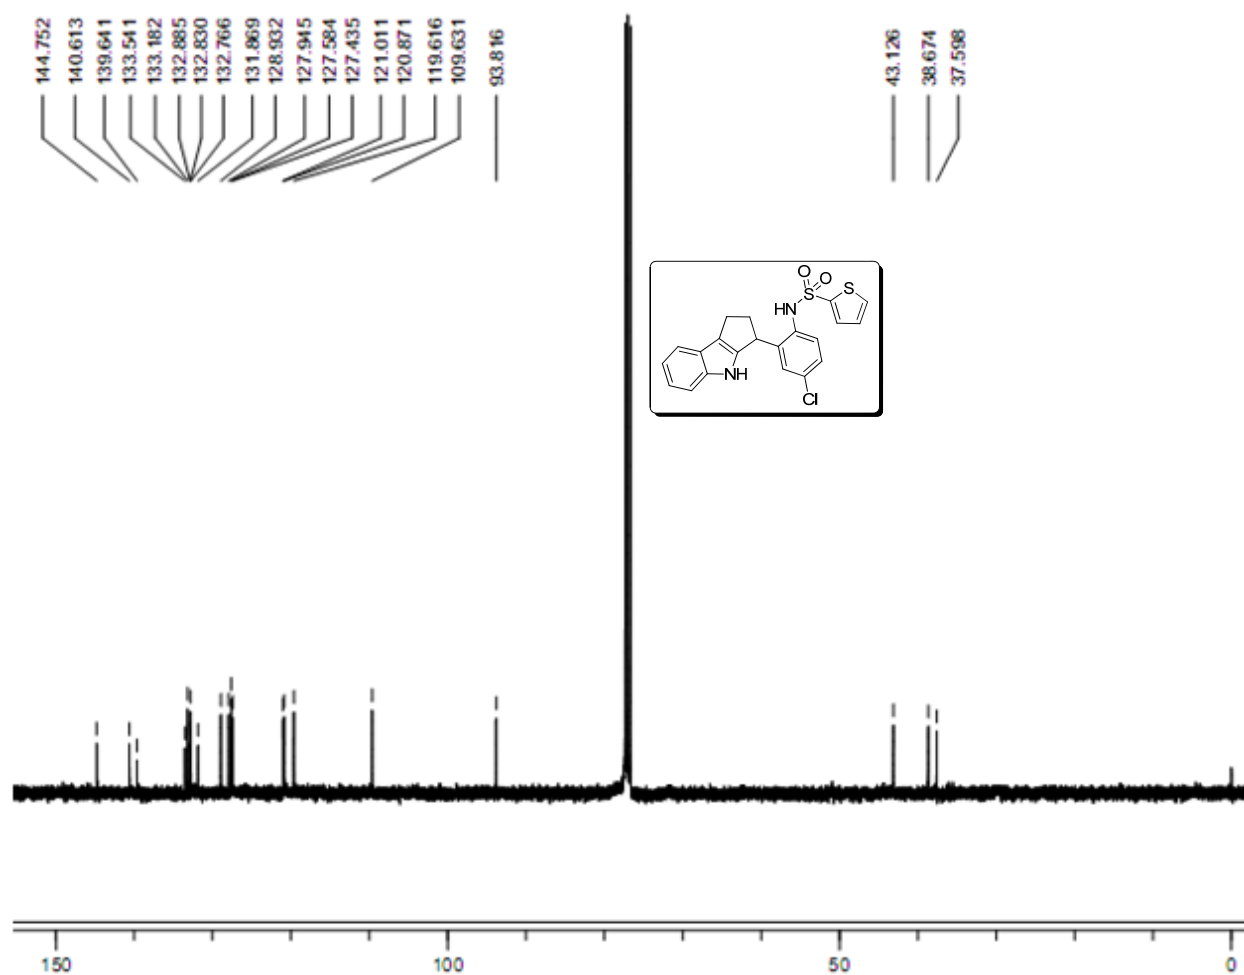

$^{13}\text{C}$  NMR spectrum (Varian, 100 MHz) of compound **4e** in  $\text{CDCl}_3$

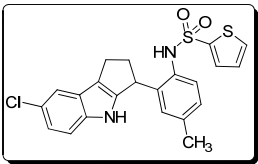

<sup>1</sup>H NMR (Varian, 400 MHz) spectrum of compound **4f** in CDCl<sub>3</sub>

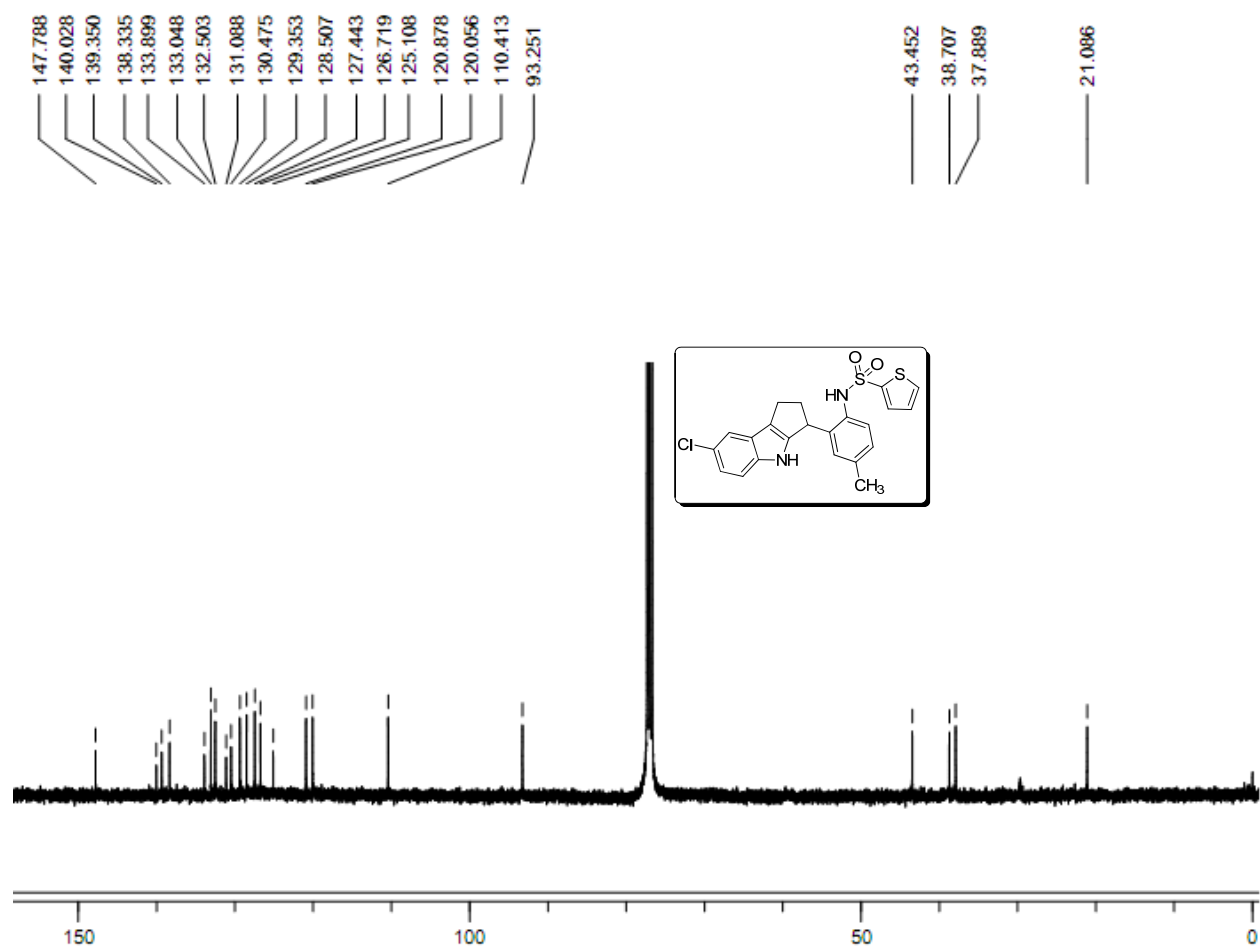

$^{13}\text{C}$  NMR spectrum (Varian, 100 MHz) of compound **4f** in  $\text{CDCl}_3$

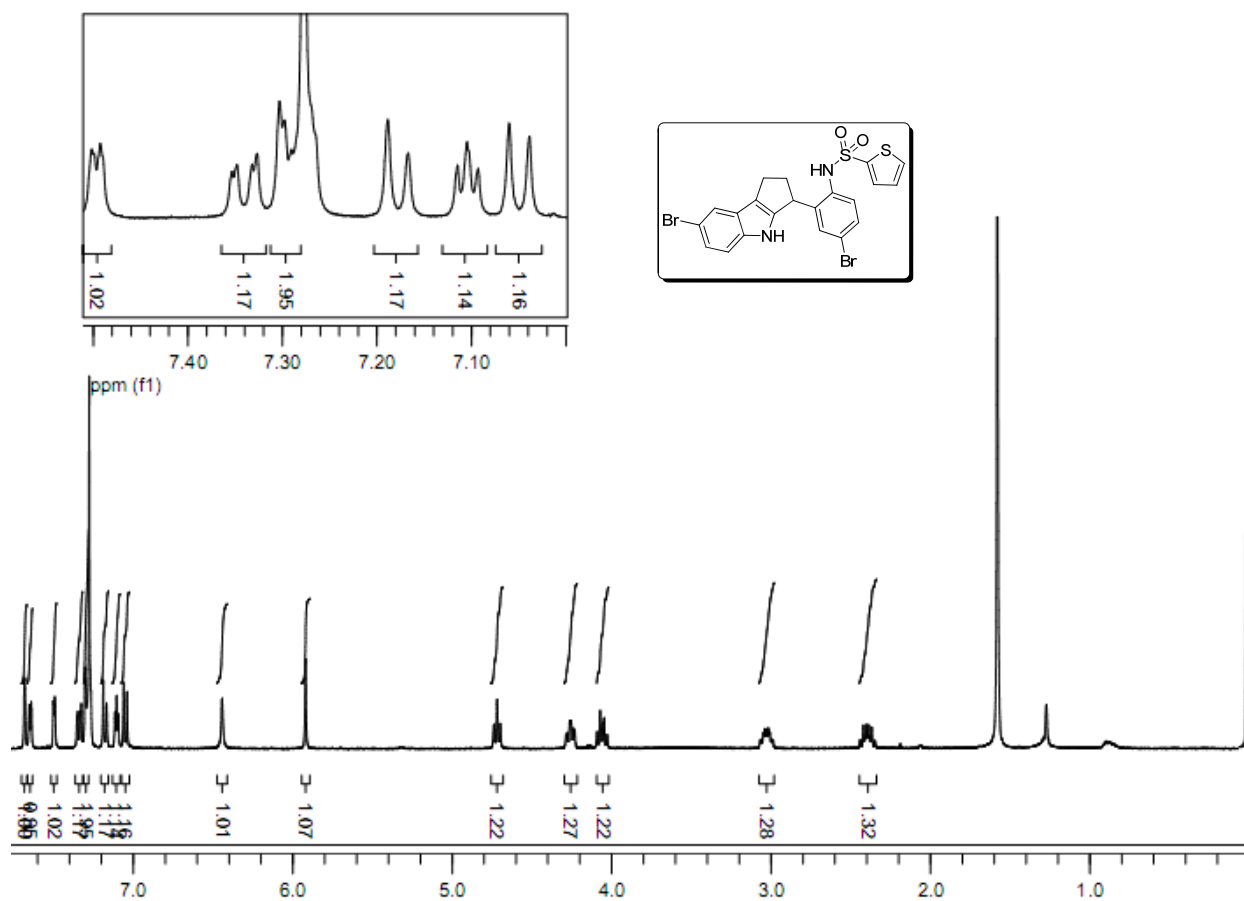

$^1\text{H}$  NMR (Varian, 400 MHz) spectrum of compound **4g** in  $\text{CDCl}_3$

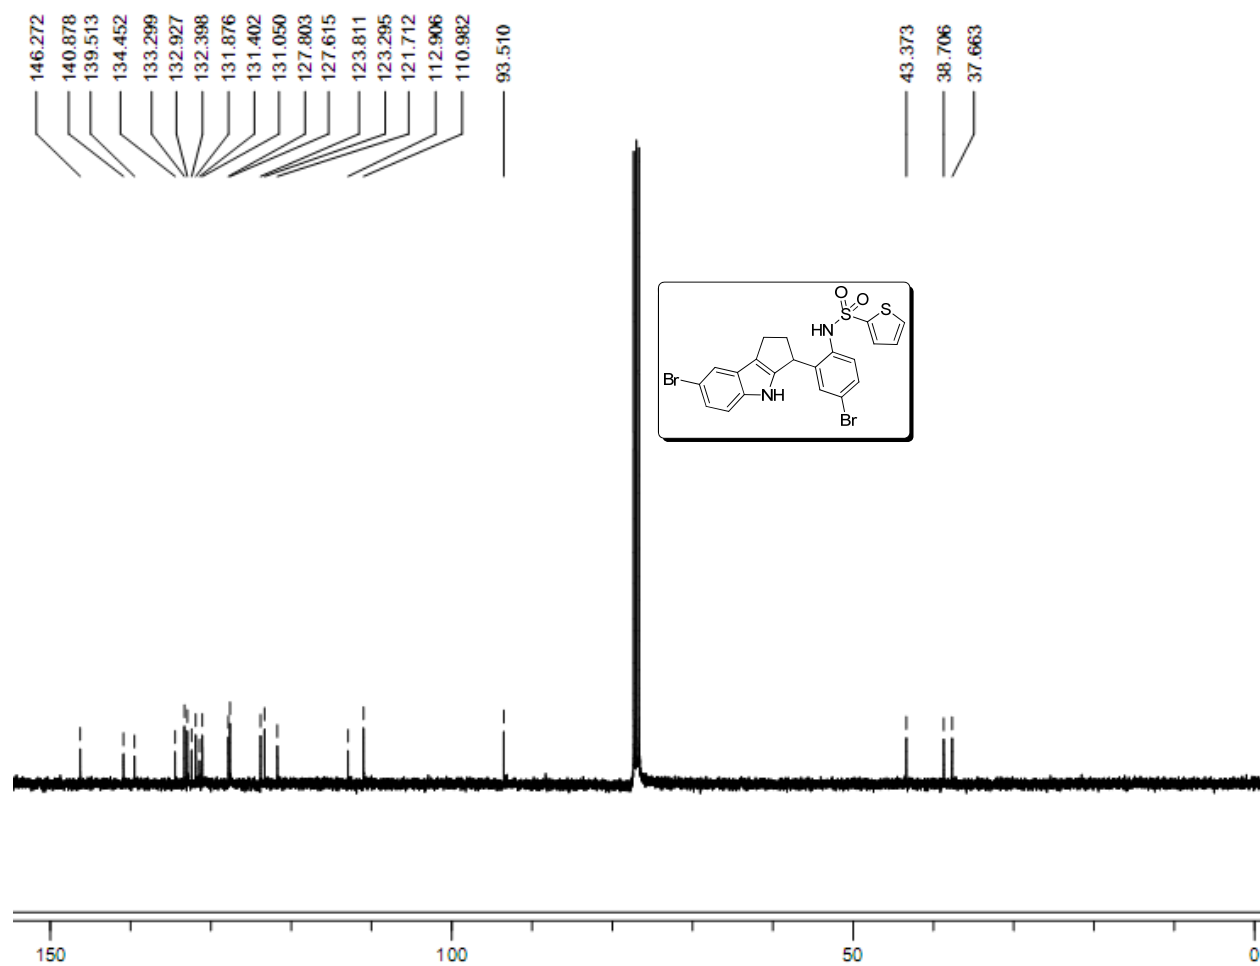



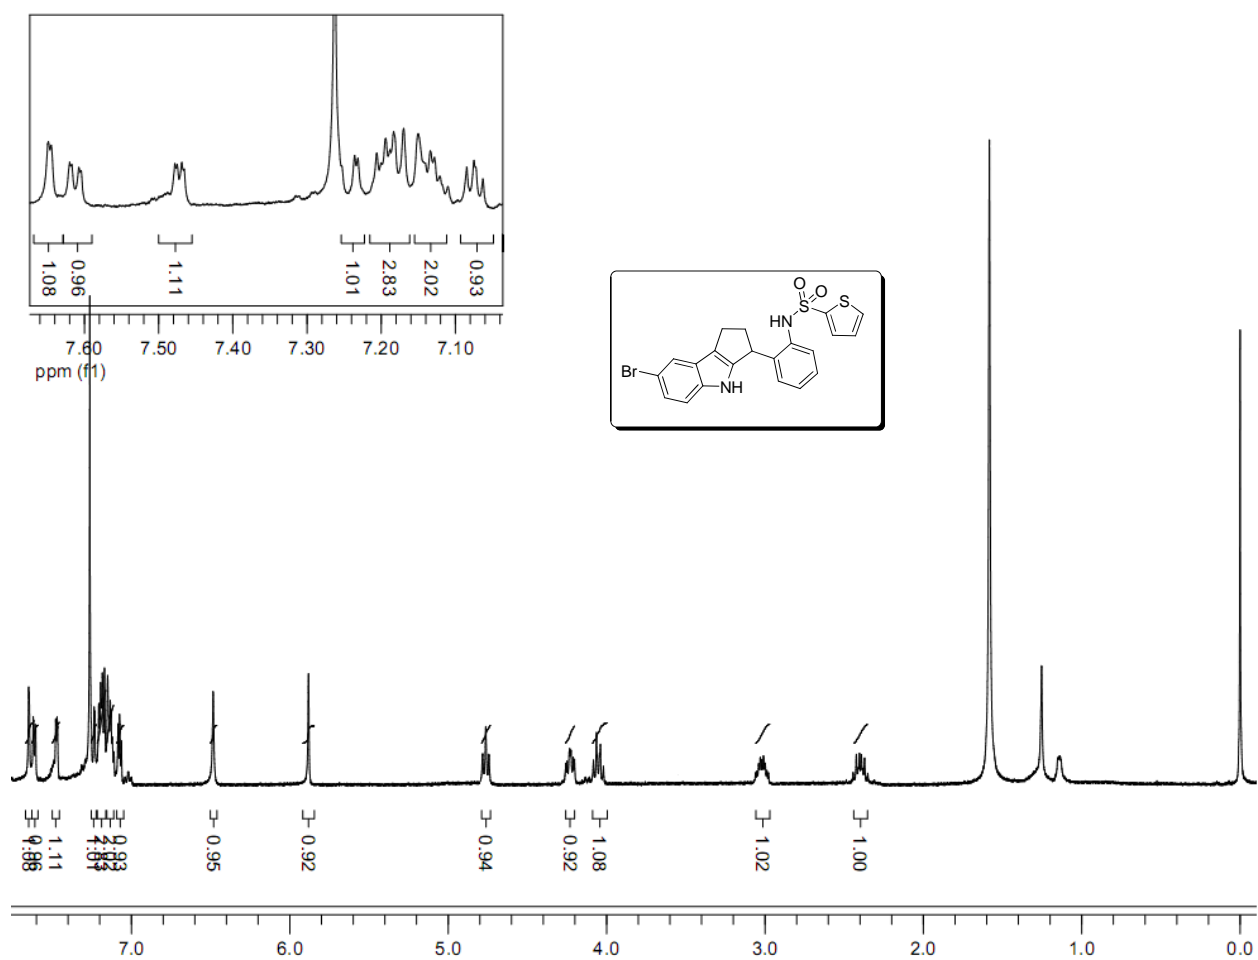

$^1\text{H}$  NMR (Varian, 400 MHz) spectrum of compound **4h** in  $\text{CDCl}_3$

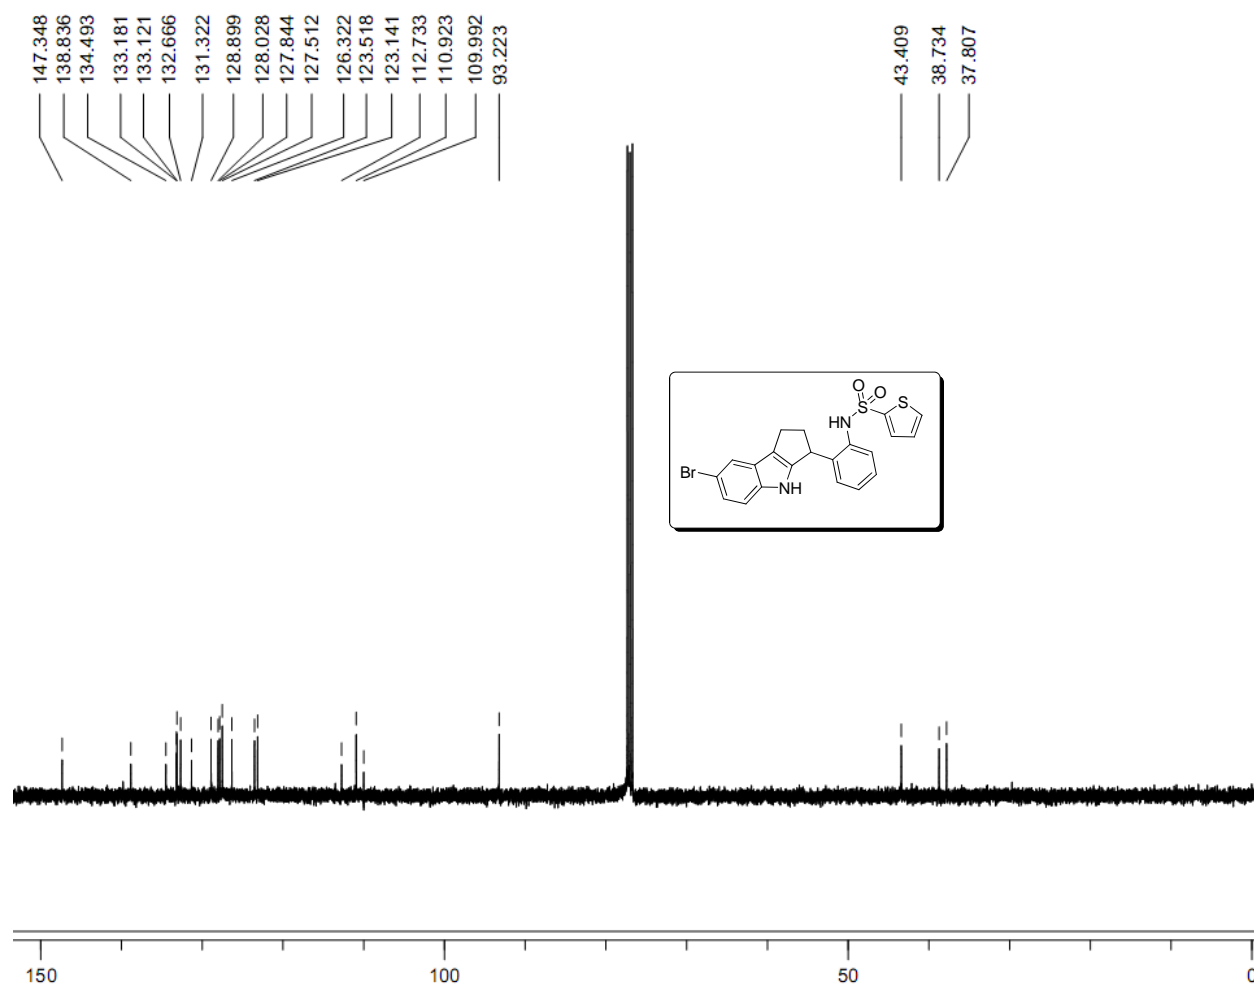

<sup>13</sup>C NMR spectrum (Varian, 100 MHz) of compound **4h** in CDCl<sub>3</sub>

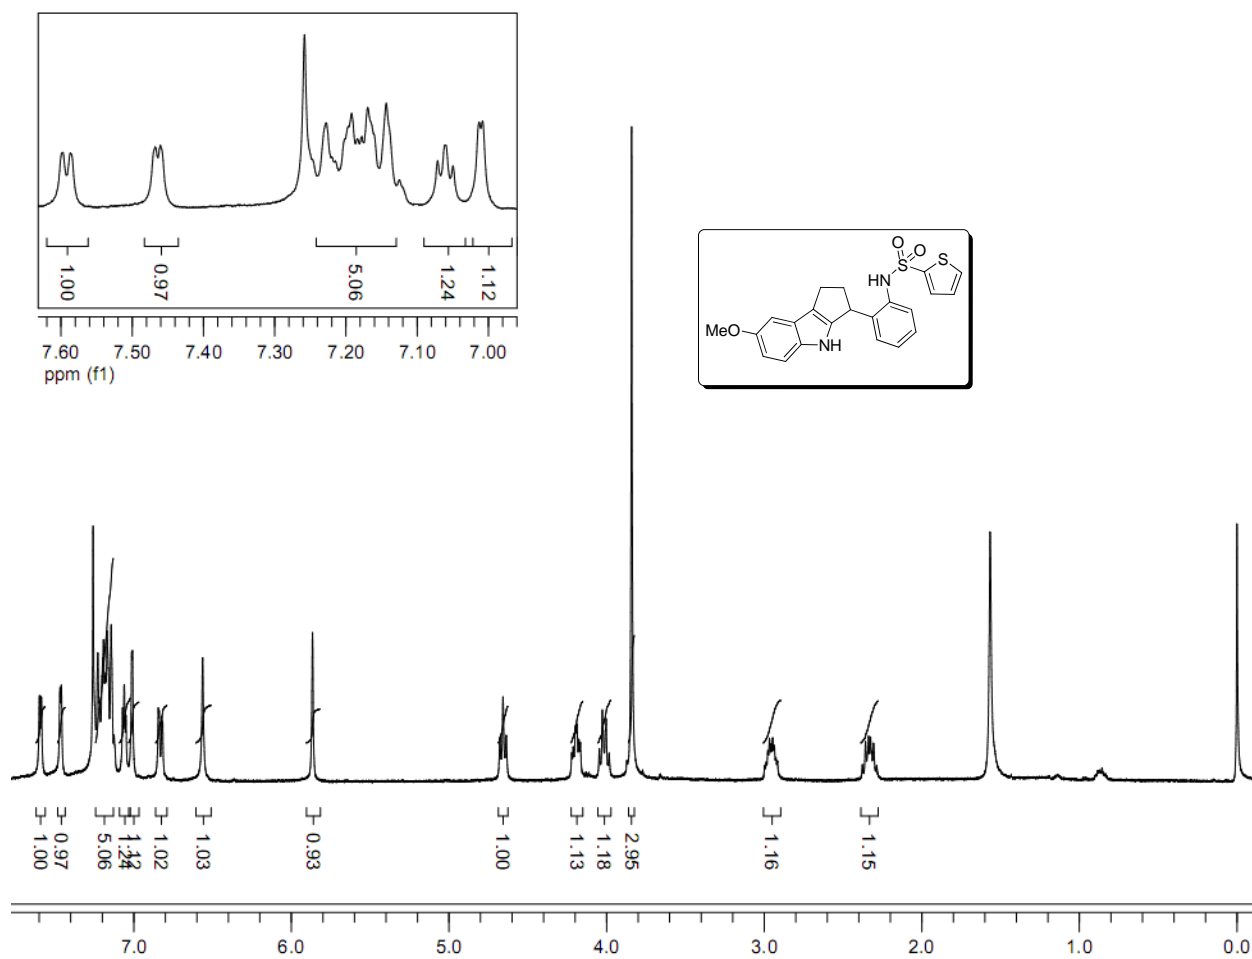

$^1\text{H}$  NMR (Varian, 400 MHz) spectrum of compound **4i** in  $\text{CDCl}_3$

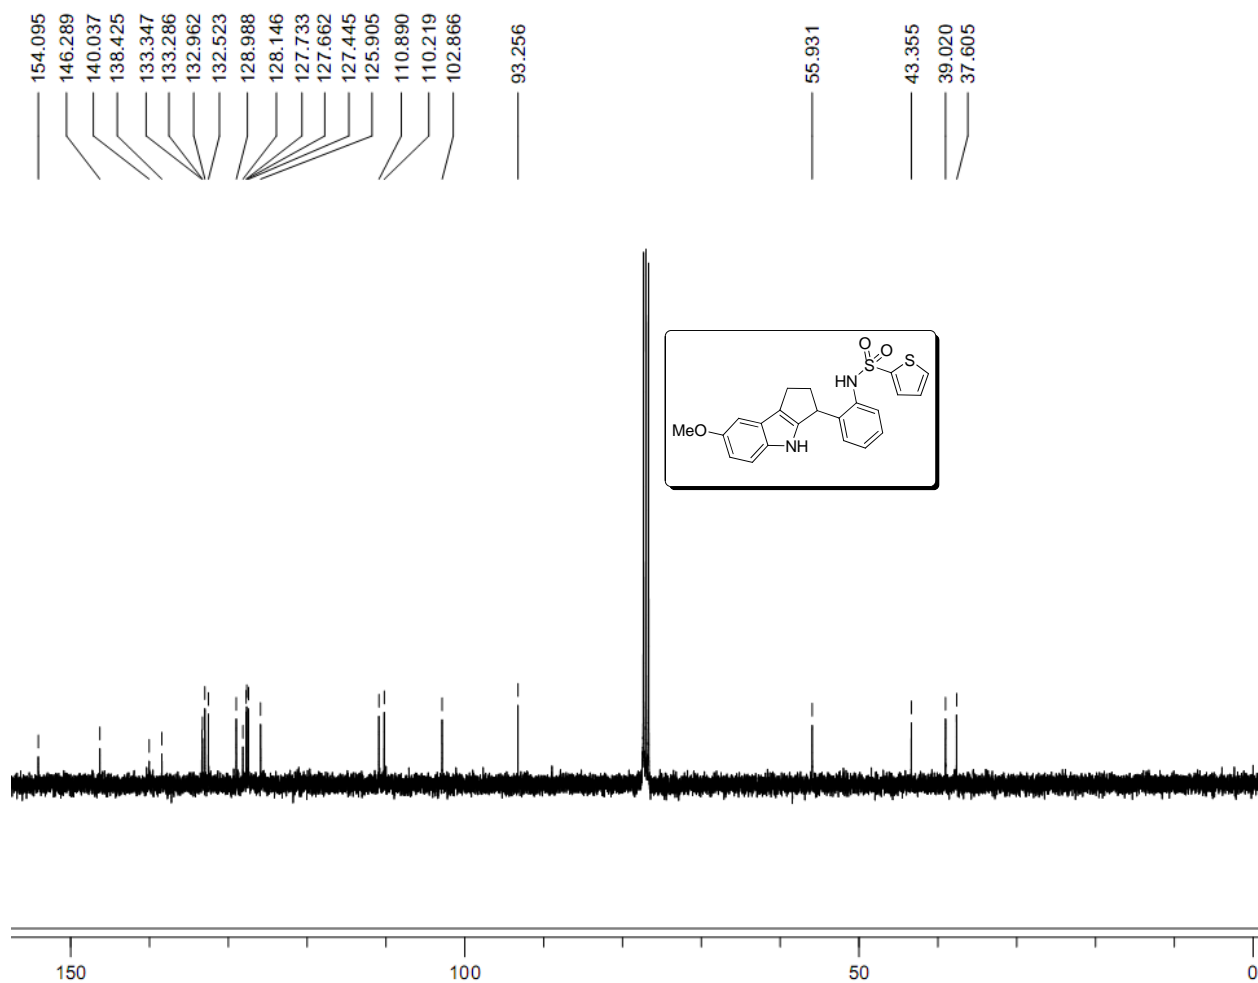

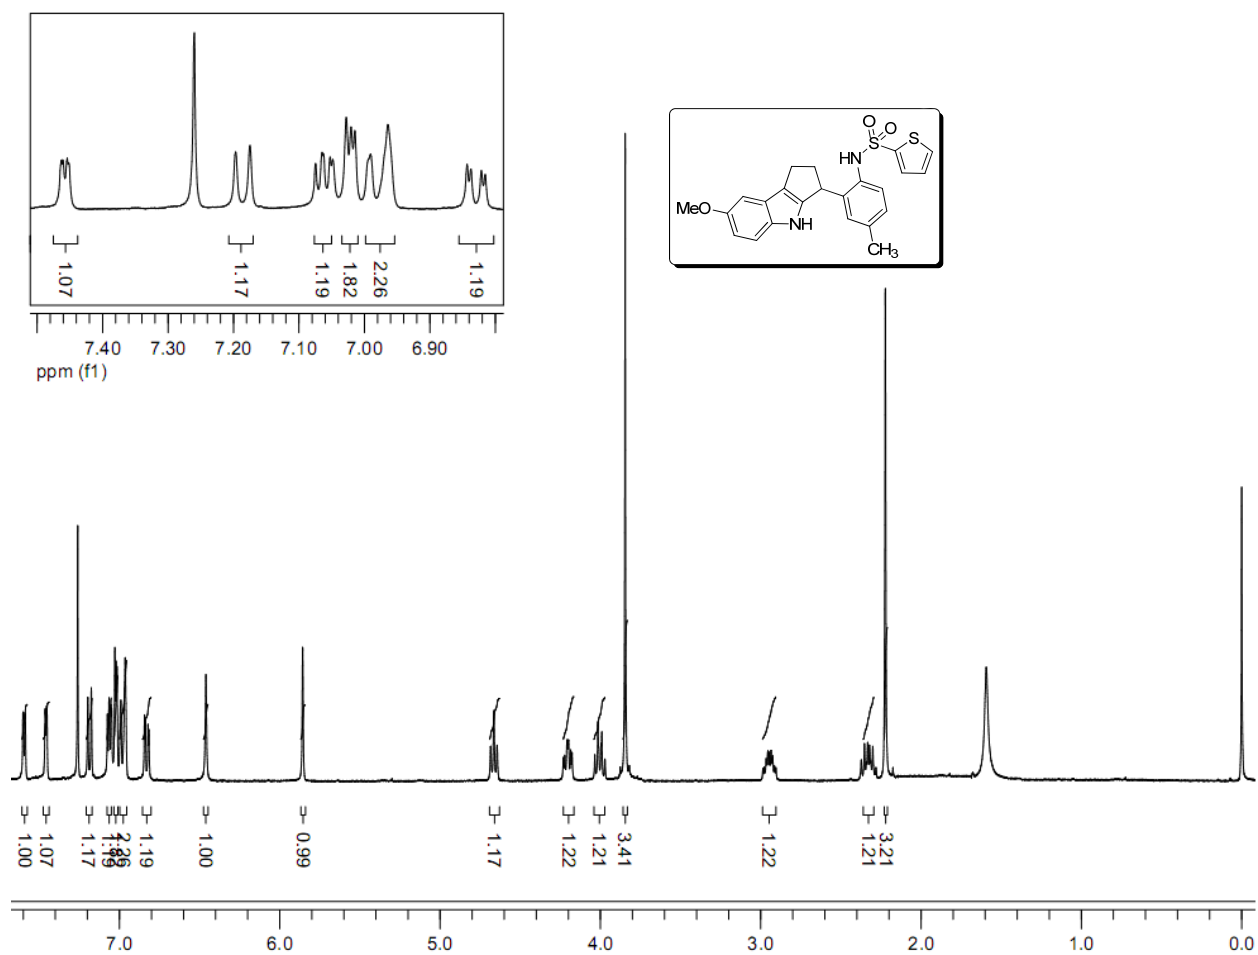

$^1\text{H}$  NMR (Varian, 400 MHz) spectrum of compound **4j** in  $\text{CDCl}_3$

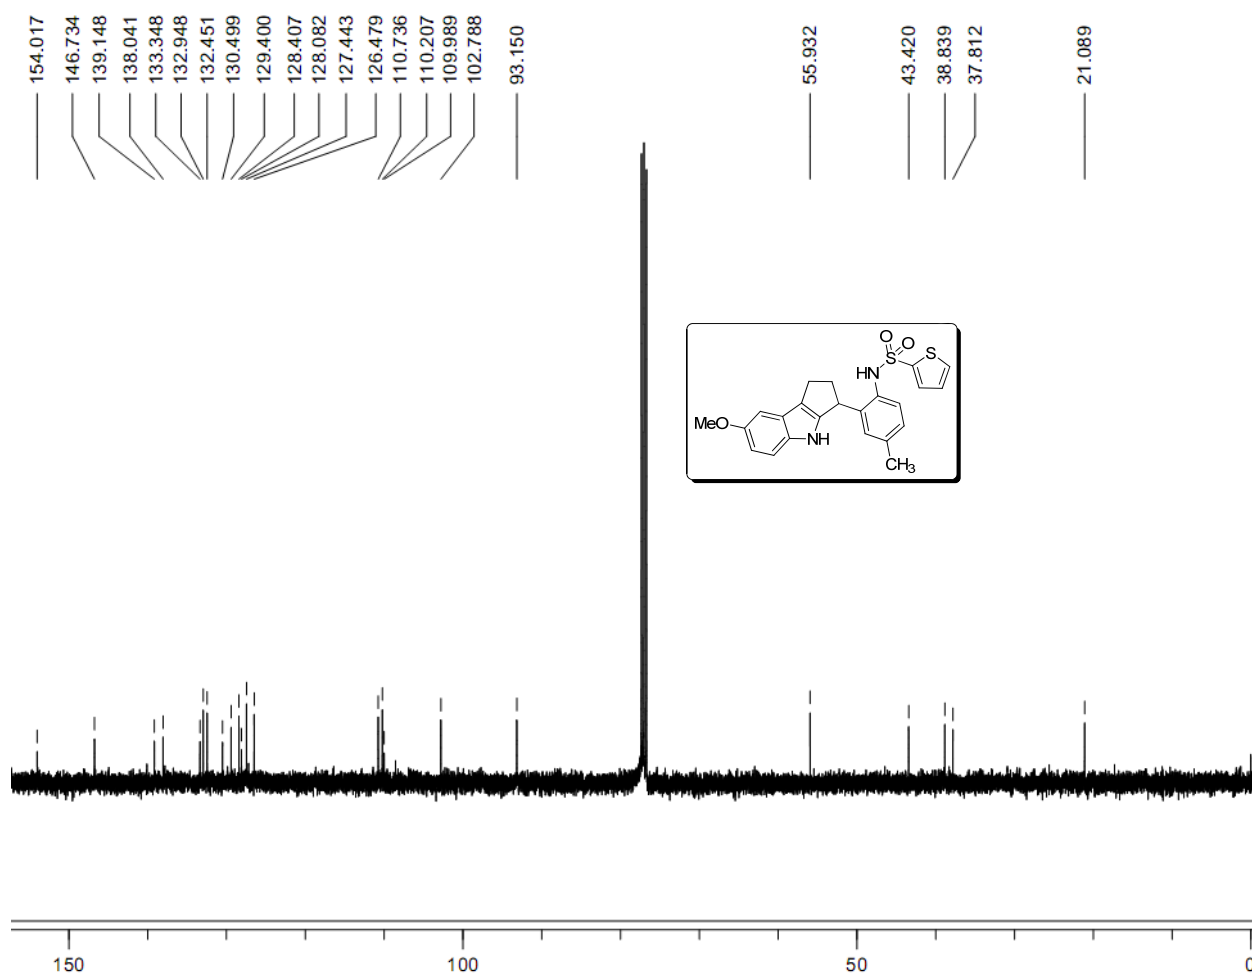

$^{13}\text{C}$  NMR spectrum (Varian, 100 MHz) of compound **4j** in  $\text{CDCl}_3$

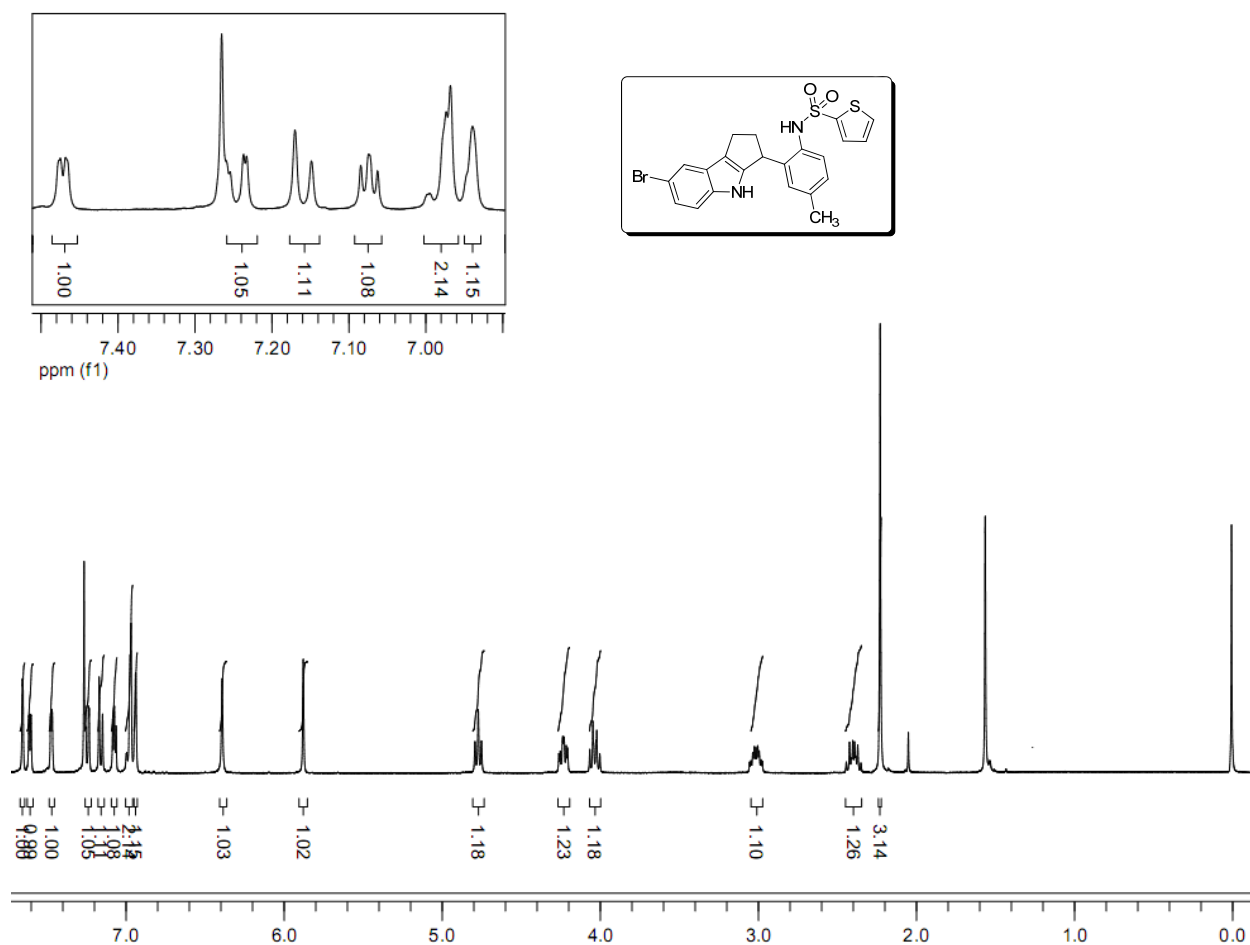

$^1\text{H}$  NMR (Varian, 400 MHz) spectrum of compound **4k** in  $\text{CDCl}_3$

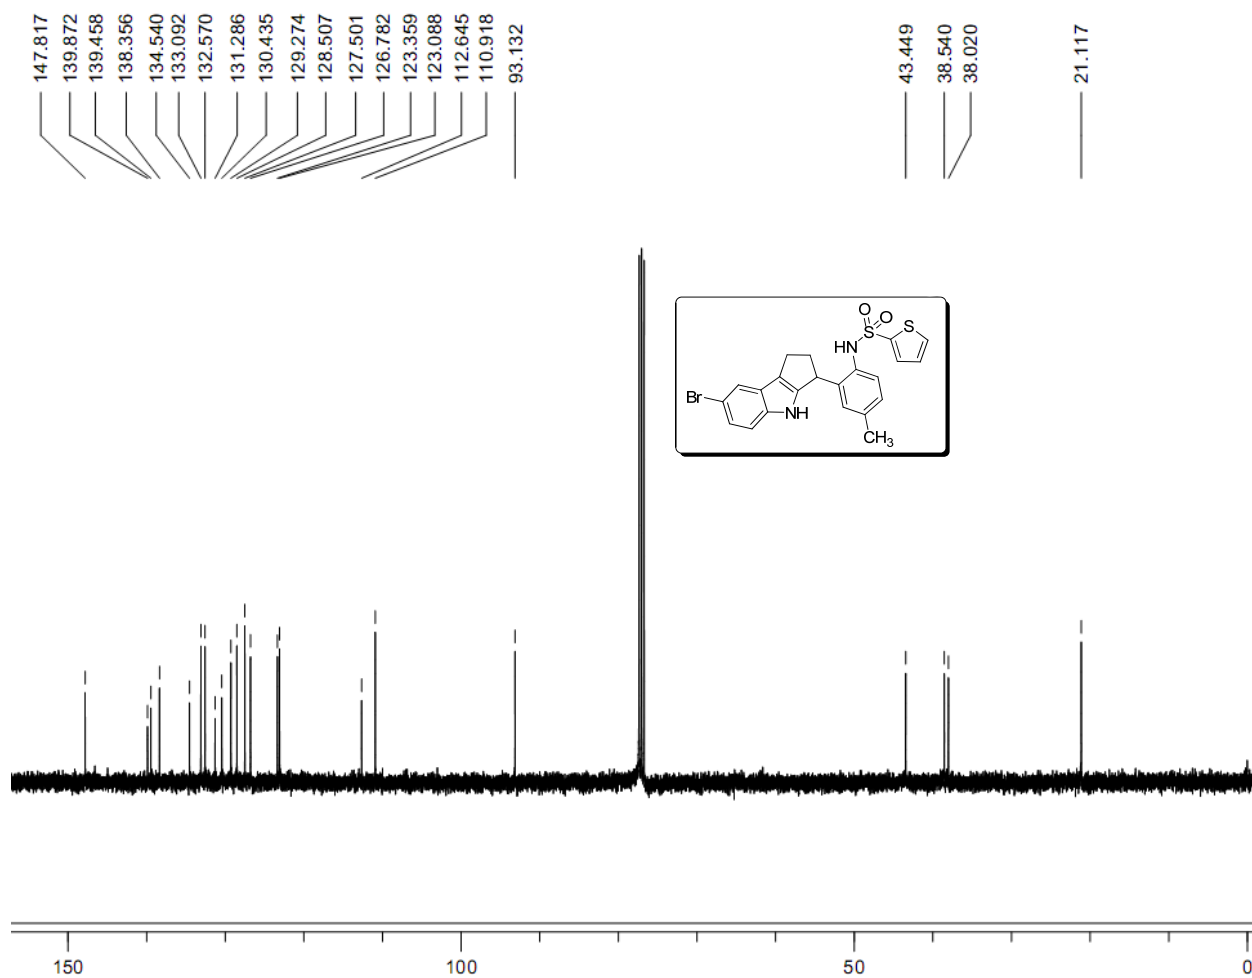

$^{13}\text{C}$  NMR spectrum (Varian, 100 MHz) of compound **4k** in  $\text{CDCl}_3$



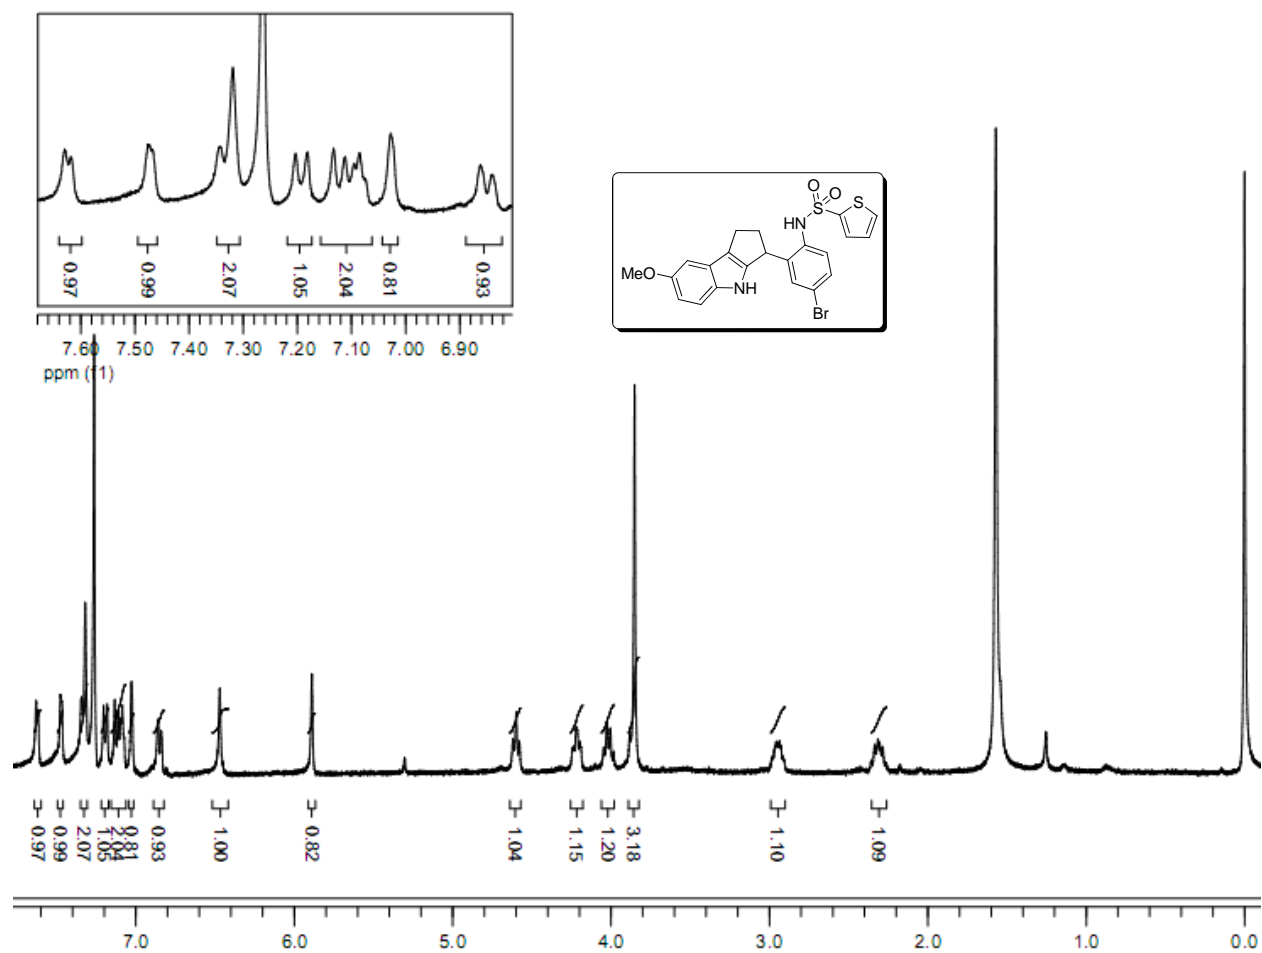

$^1\text{H}$  NMR (Varian, 400 MHz) spectrum of compound **4l** in  $\text{CDCl}_3$

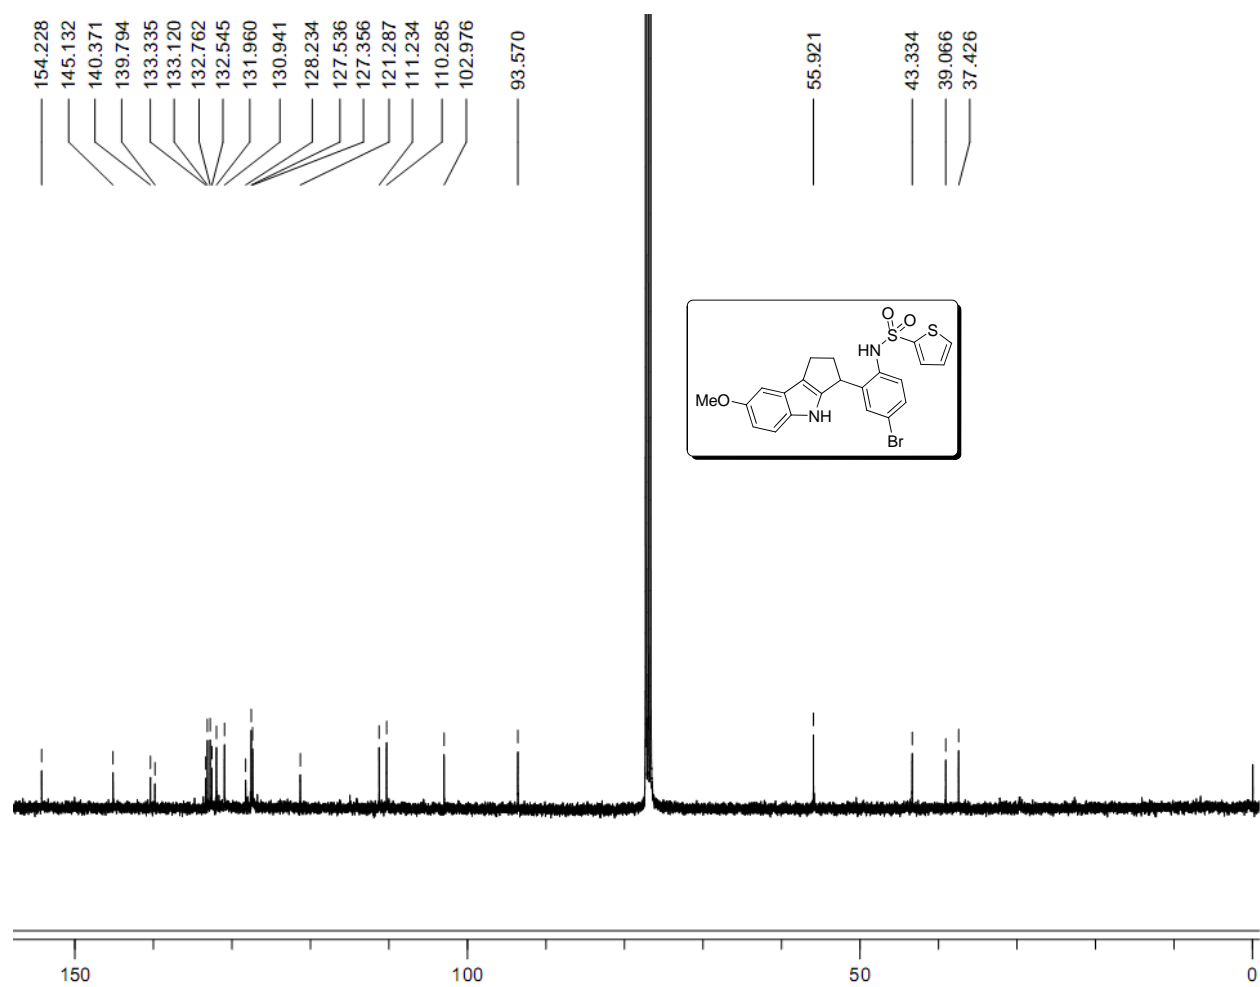

$^{13}\text{C}$  NMR spectrum (Varian, 100 MHz) of compound **4l** in  $\text{CDCl}_3$

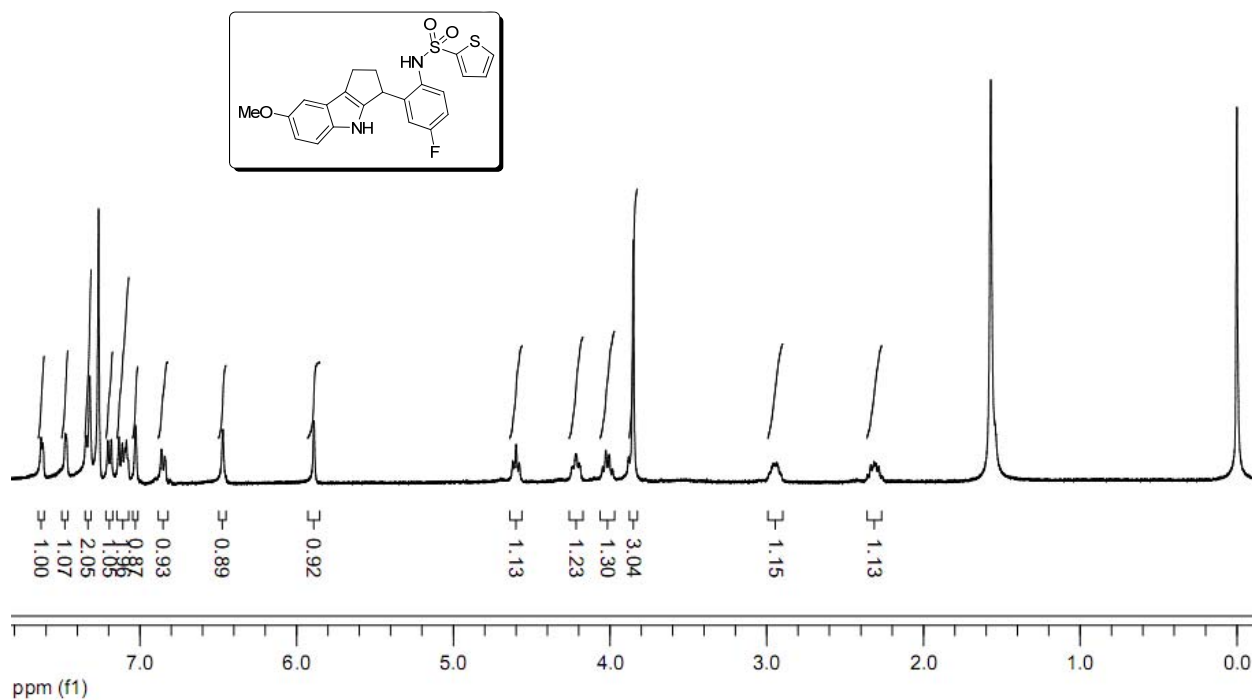

<sup>1</sup>H NMR (Varian, 400 MHz) spectrum of compound **4m** in CDCl<sub>3</sub>

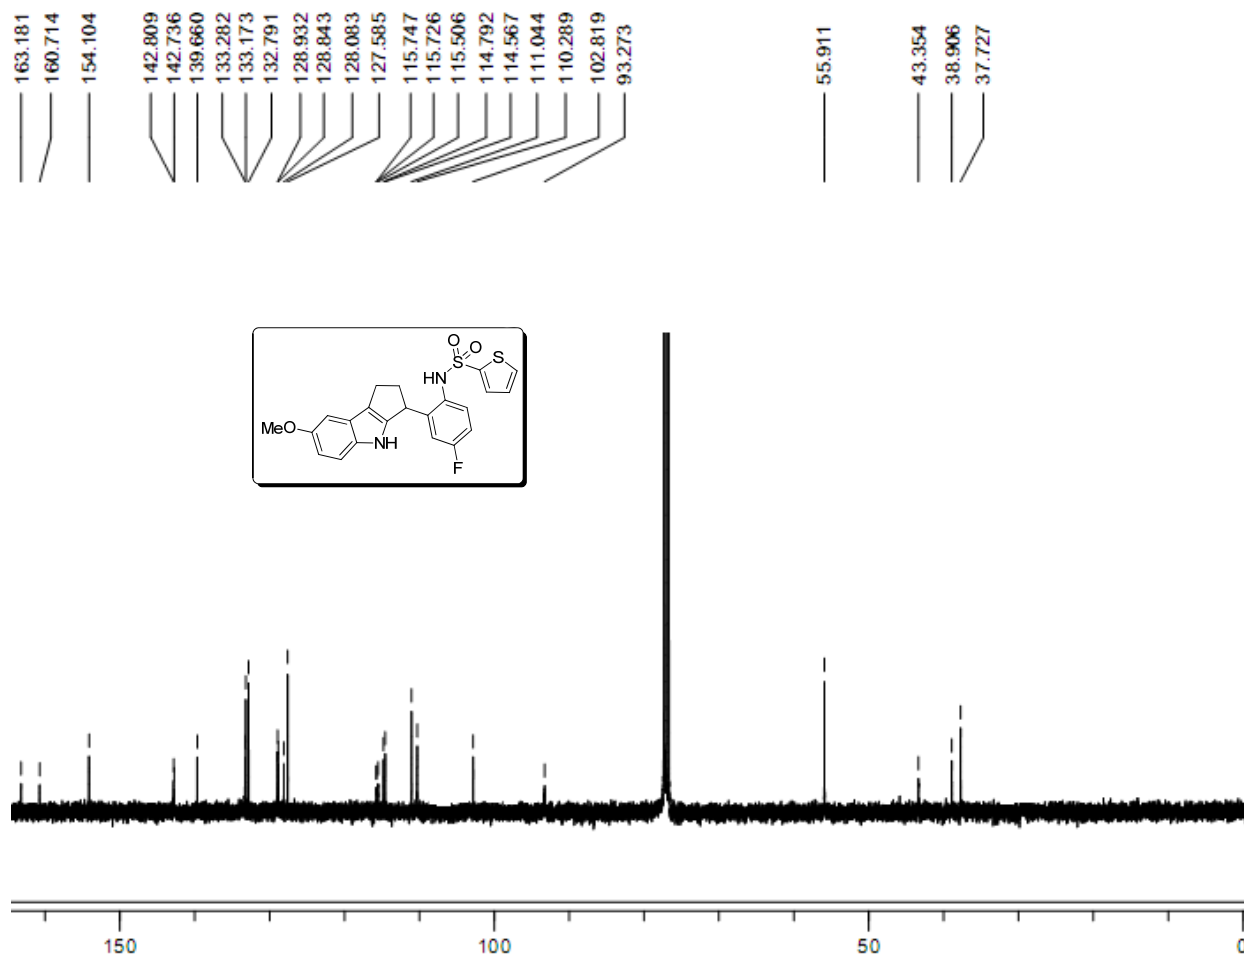

<sup>13</sup>C NMR spectrum (Varian, 100 MHz) of compound **4m** in CDCl<sub>3</sub>

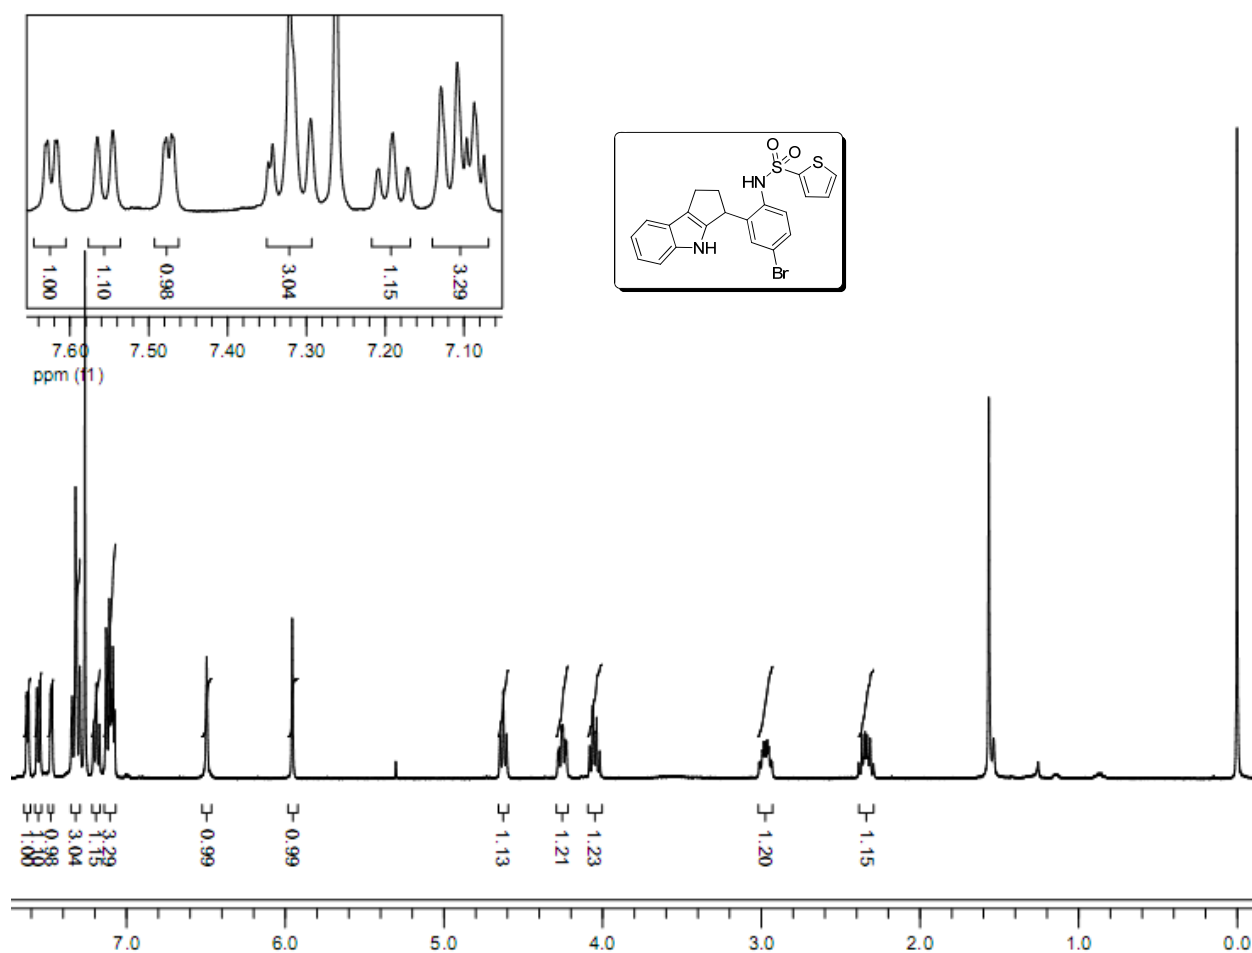

$^1\text{H}$  NMR (Varian, 400 MHz) spectrum of compound **4n** in  $\text{CDCl}_3$

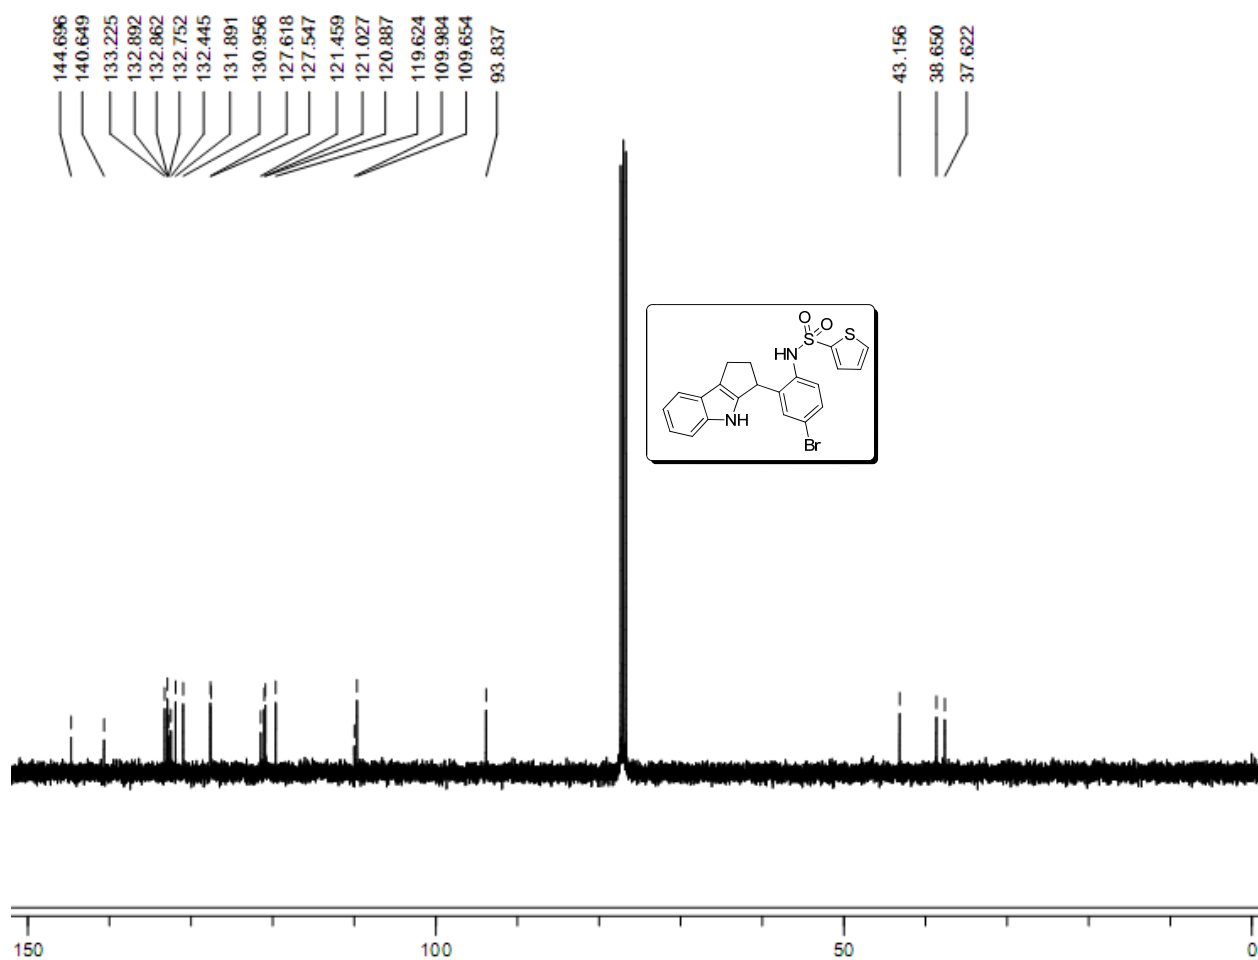

$^{13}\text{C}$  NMR spectrum (Varian, 100 MHz) of compound **4n** in  $\text{CDCl}_3$

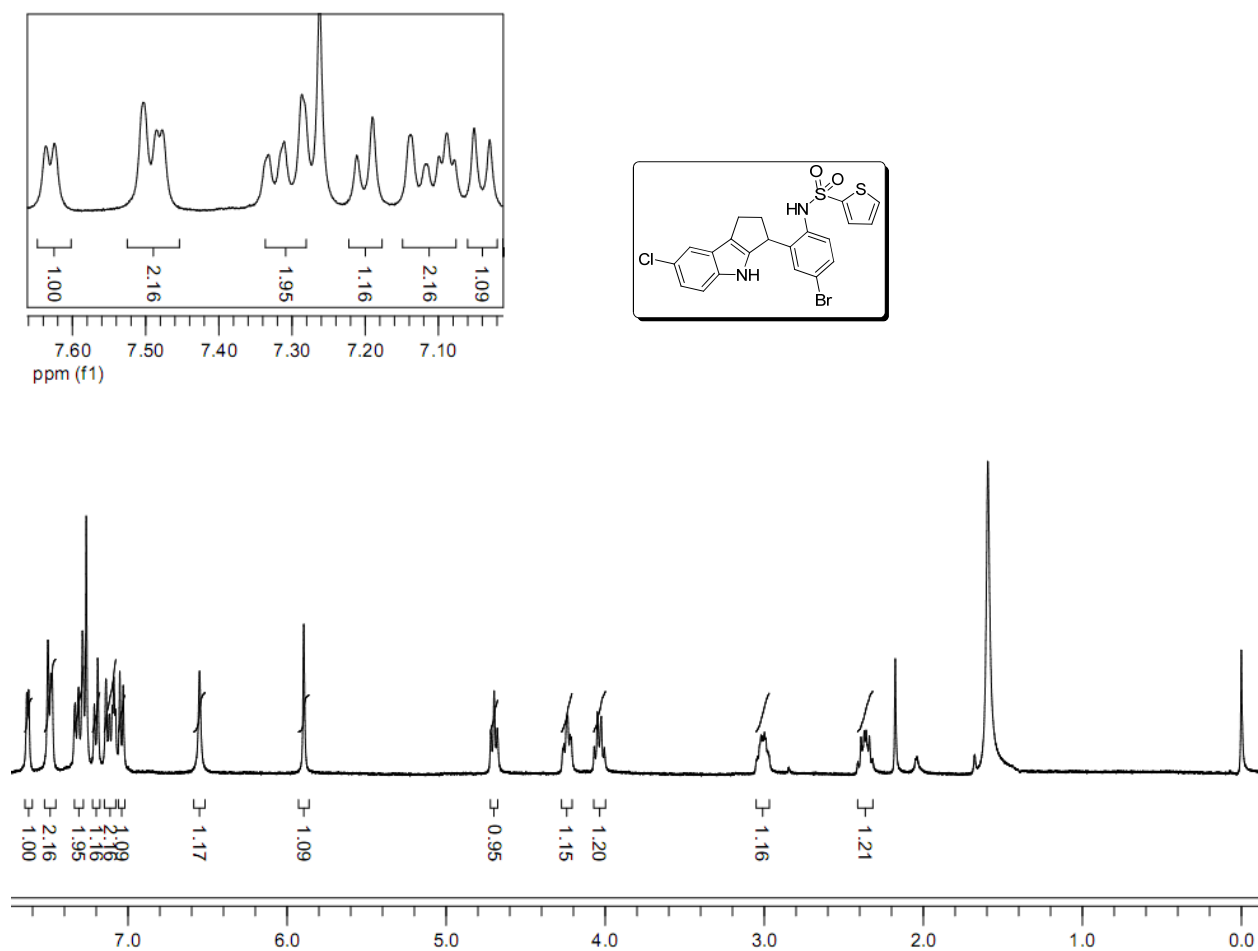

$^1\text{H}$  NMR (Varian, 400 MHz) spectrum of compound **4o** in  $\text{CDCl}_3$

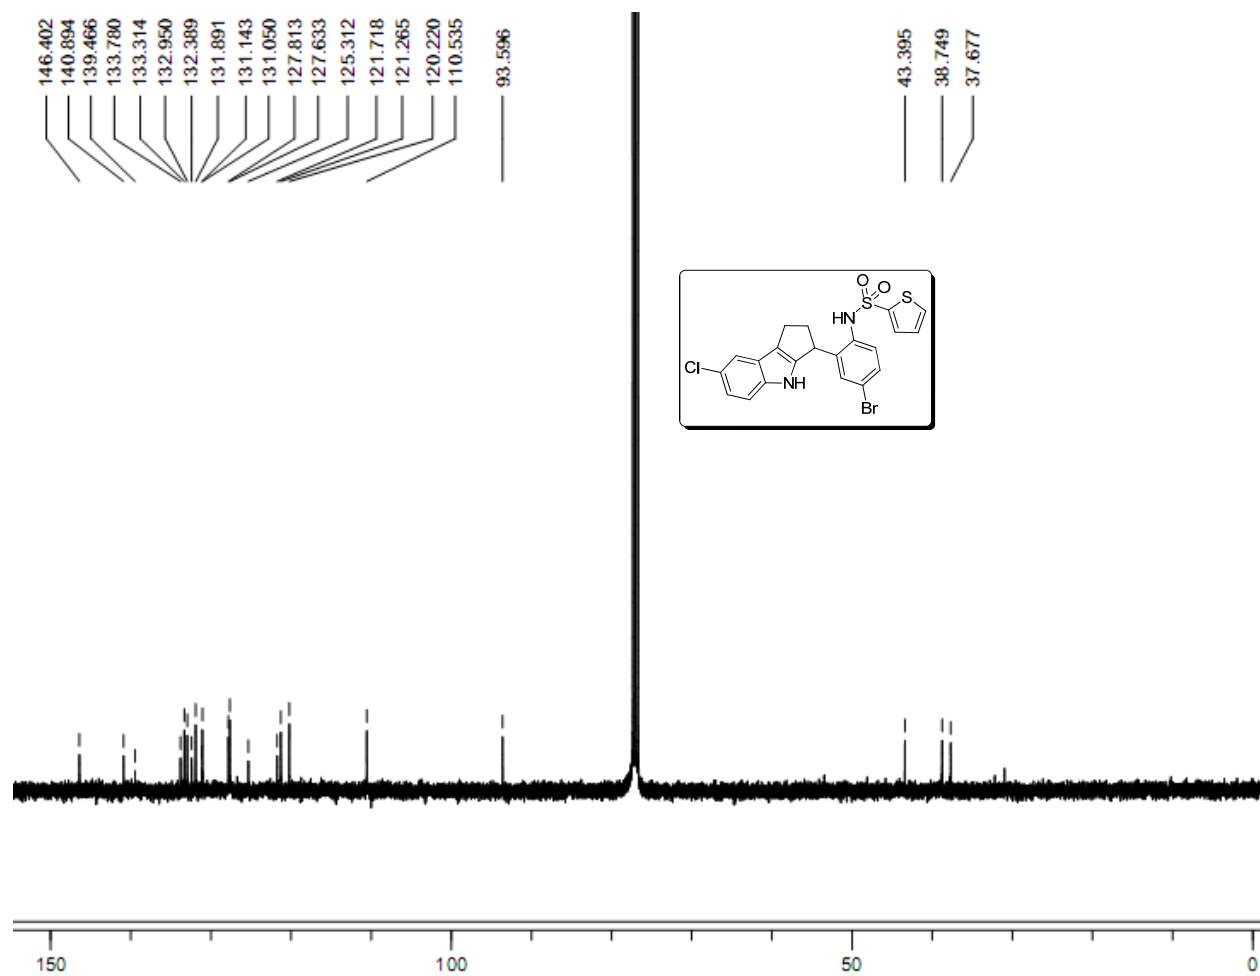

<sup>13</sup>C NMR spectrum (Varian, 100 MHz) of compound **4o** in CDCl<sub>3</sub>



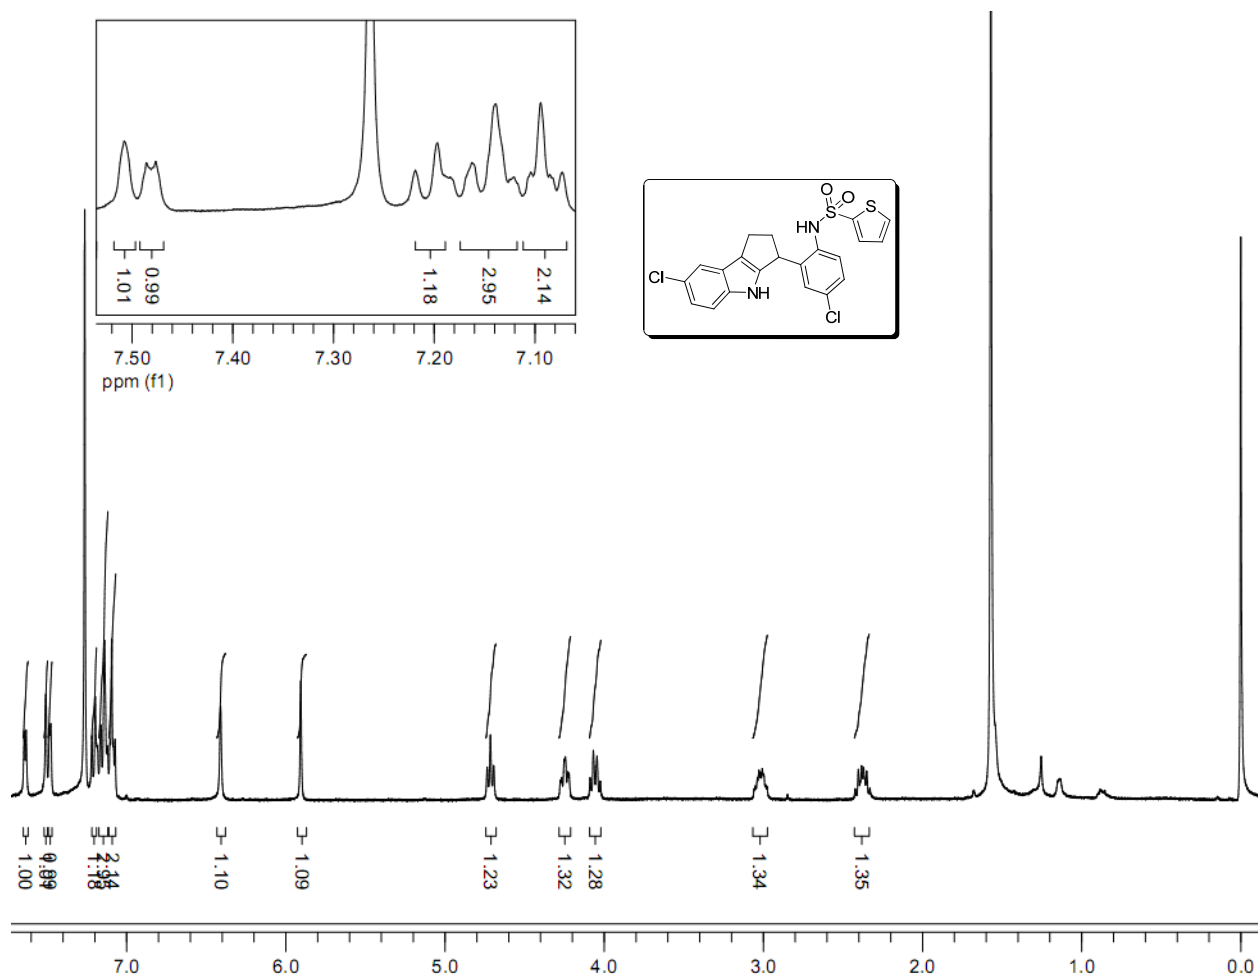

$^1\text{H}$  NMR (Varian, 400 MHz) spectrum of compound **4p** in  $\text{CDCl}_3$

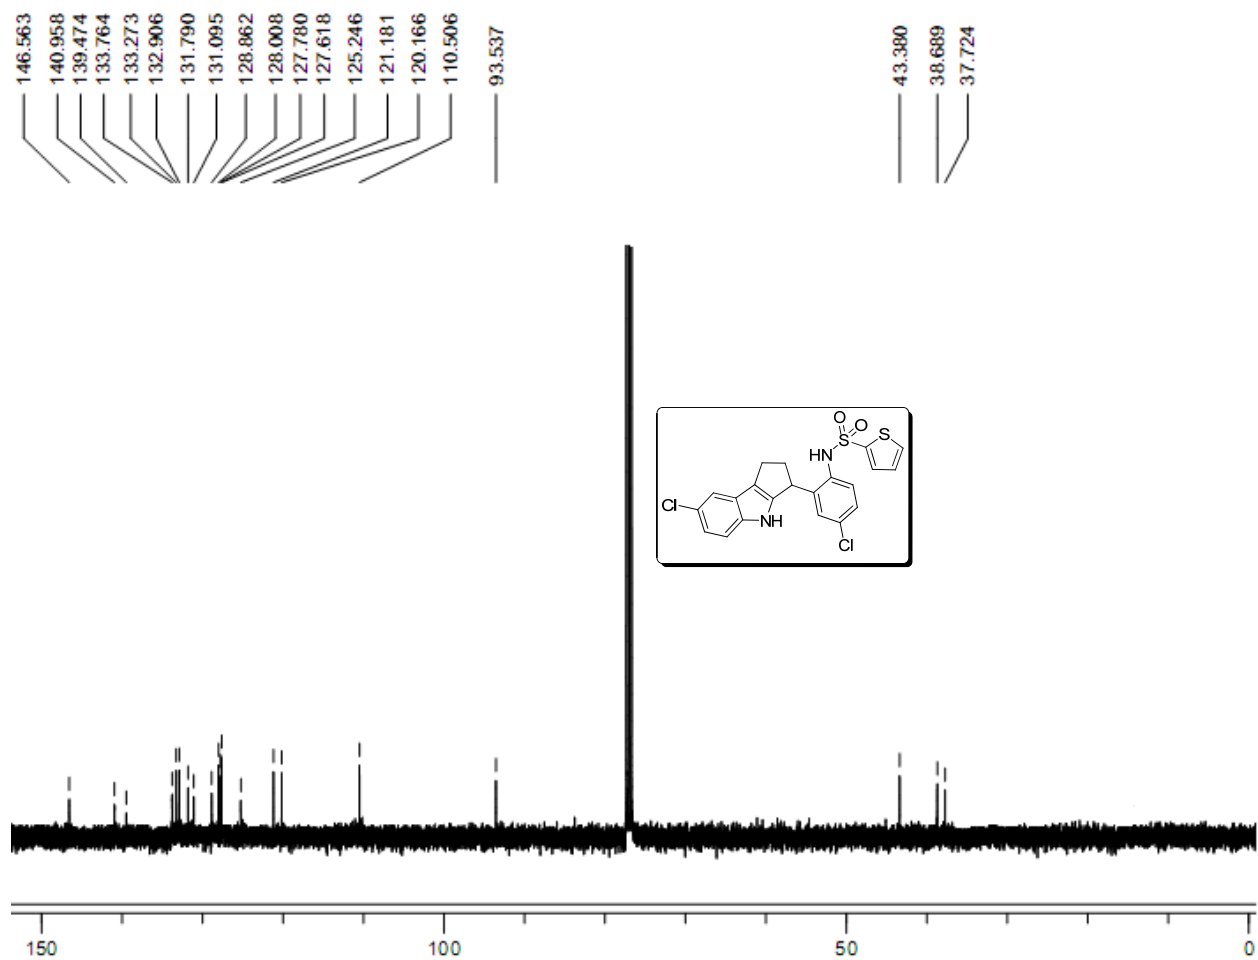

$^{13}\text{C}$  NMR spectrum (Varian, 100 MHz) of compound **4p** in  $\text{CDCl}_3$

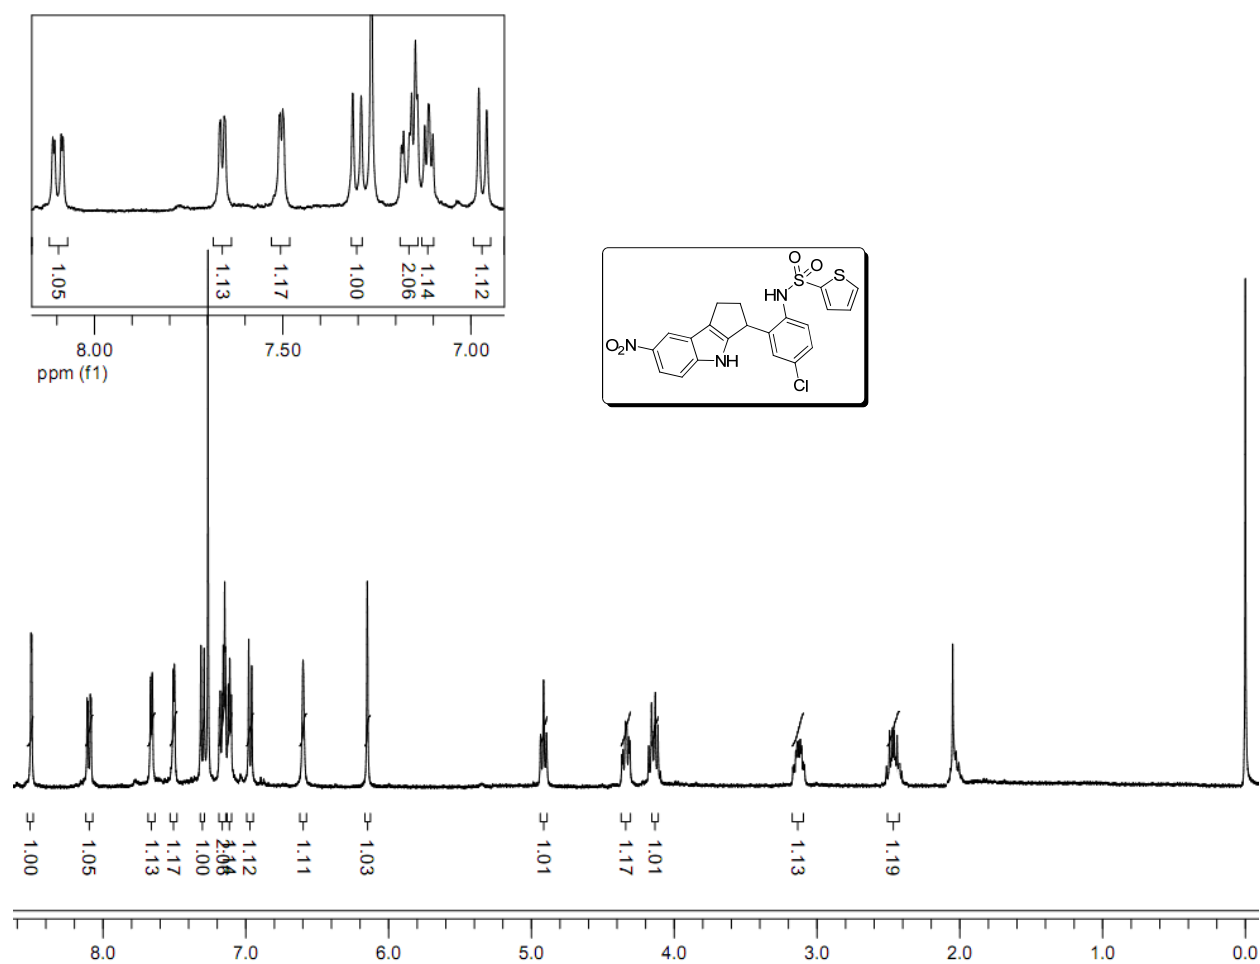

$^1\text{H}$  NMR (Varian, 400 MHz) spectrum of compound **4q** in  $\text{CDCl}_3$

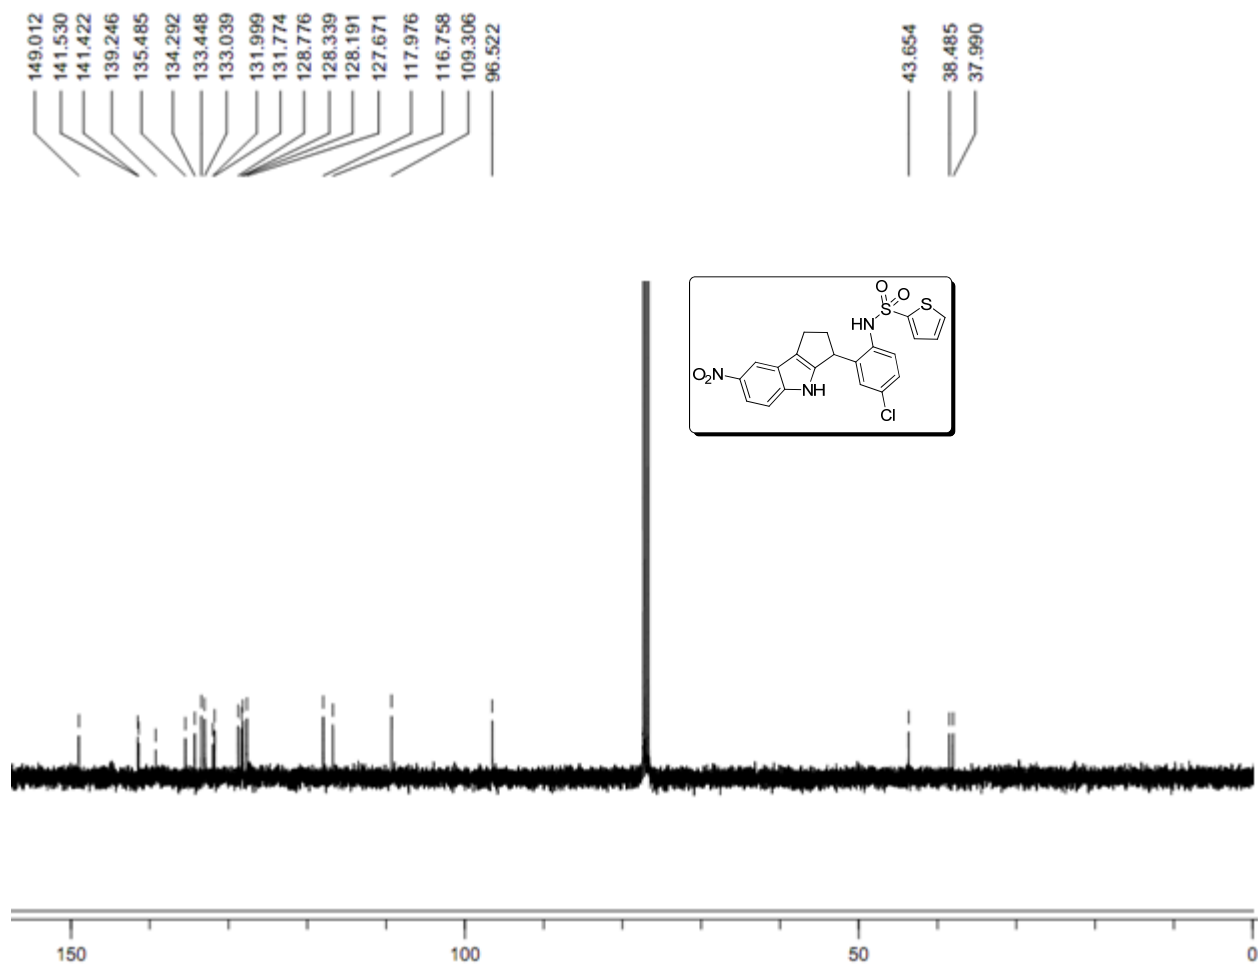

<sup>13</sup>C NMR spectrum (Varian, 100 MHz) of compound **4q** in CDCl<sub>3</sub>

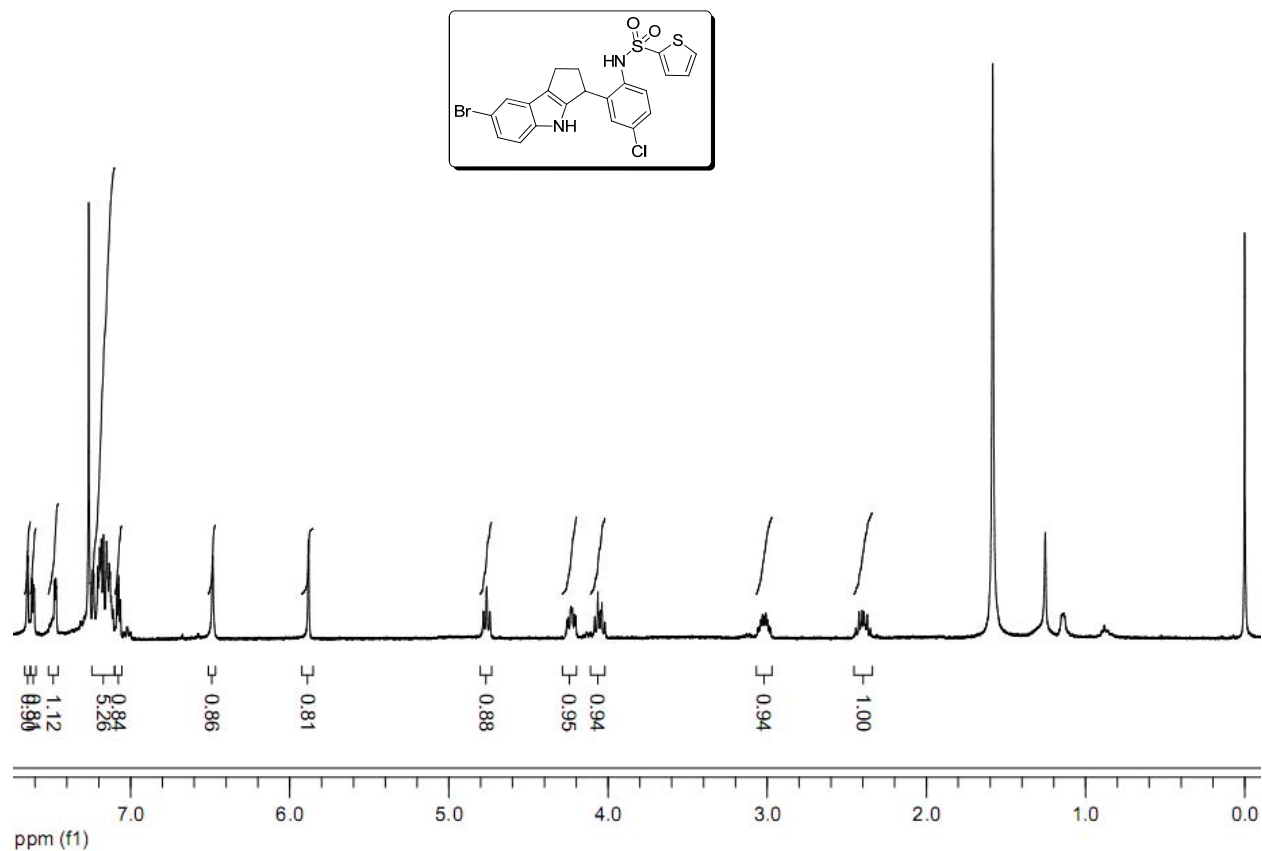

$^1\text{H}$  NMR (Varian, 400 MHz) spectrum of compound **4r** in  $\text{CDCl}_3$

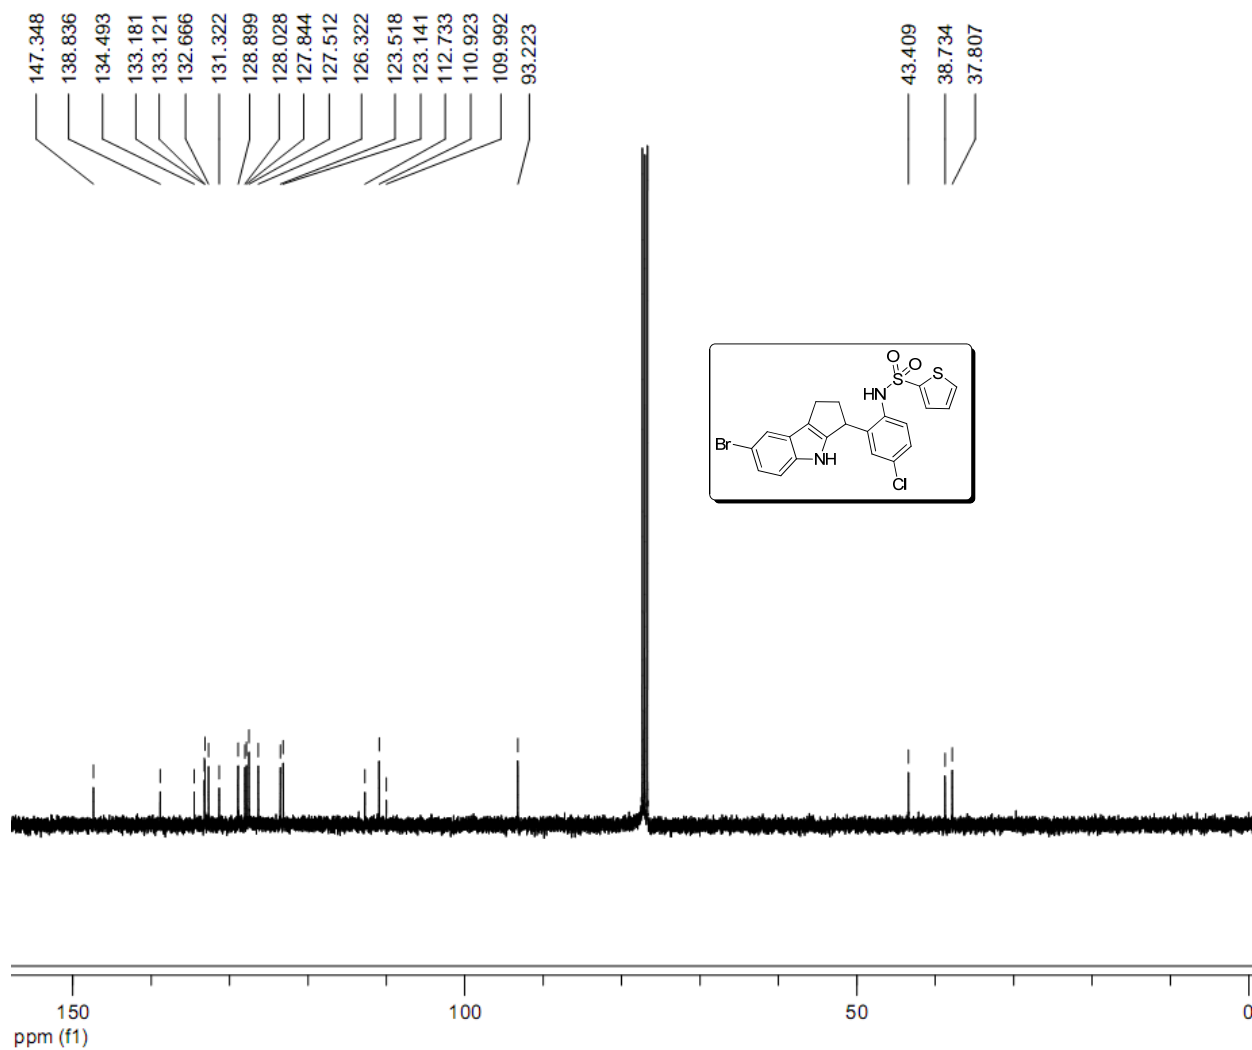

$^{13}\text{C}$  NMR spectrum (Varian, 100 MHz) of compound **4r** in  $\text{CDCl}_3$

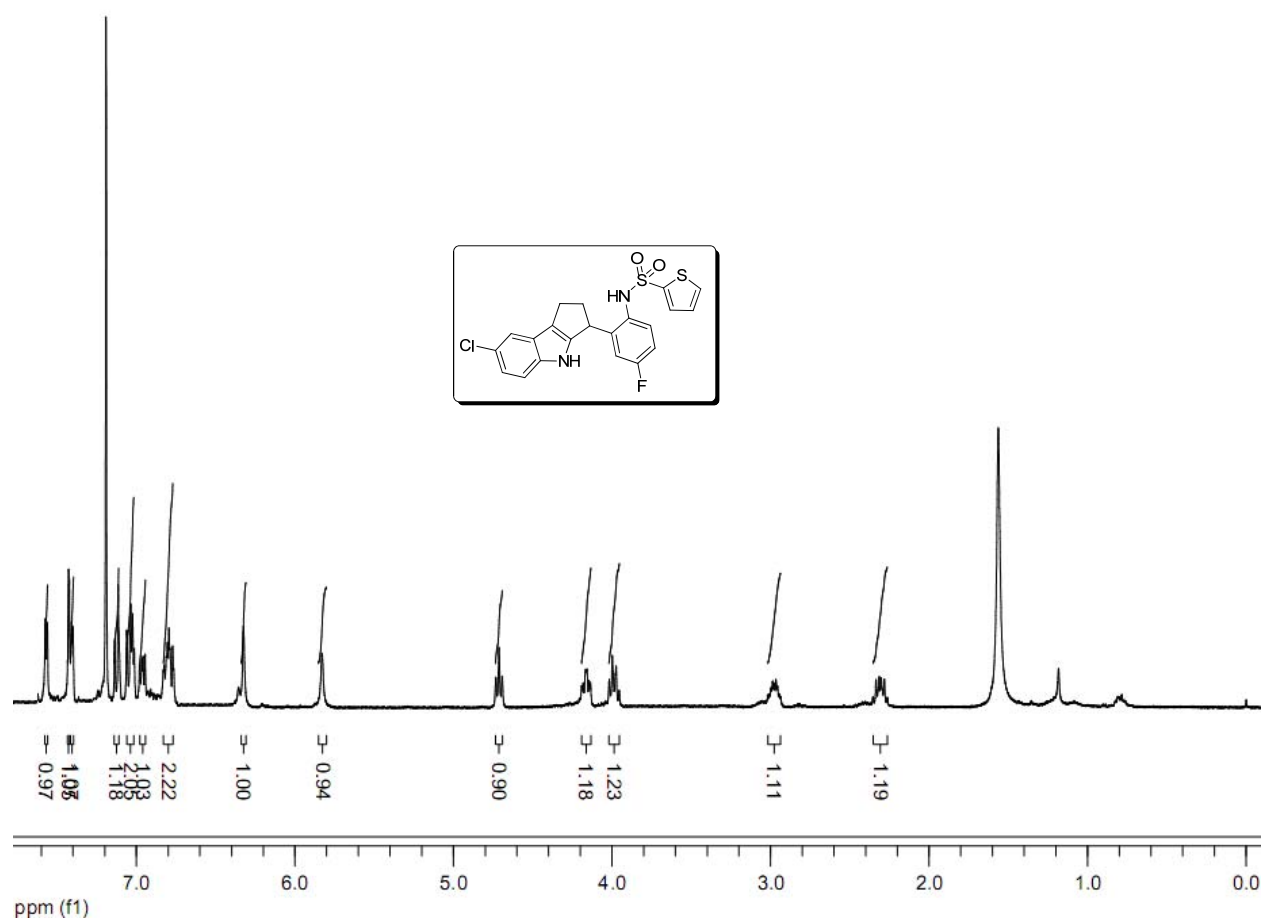

<sup>1</sup>H NMR (Varian, 400 MHz) spectrum of compound **4s** in CDCl<sub>3</sub>

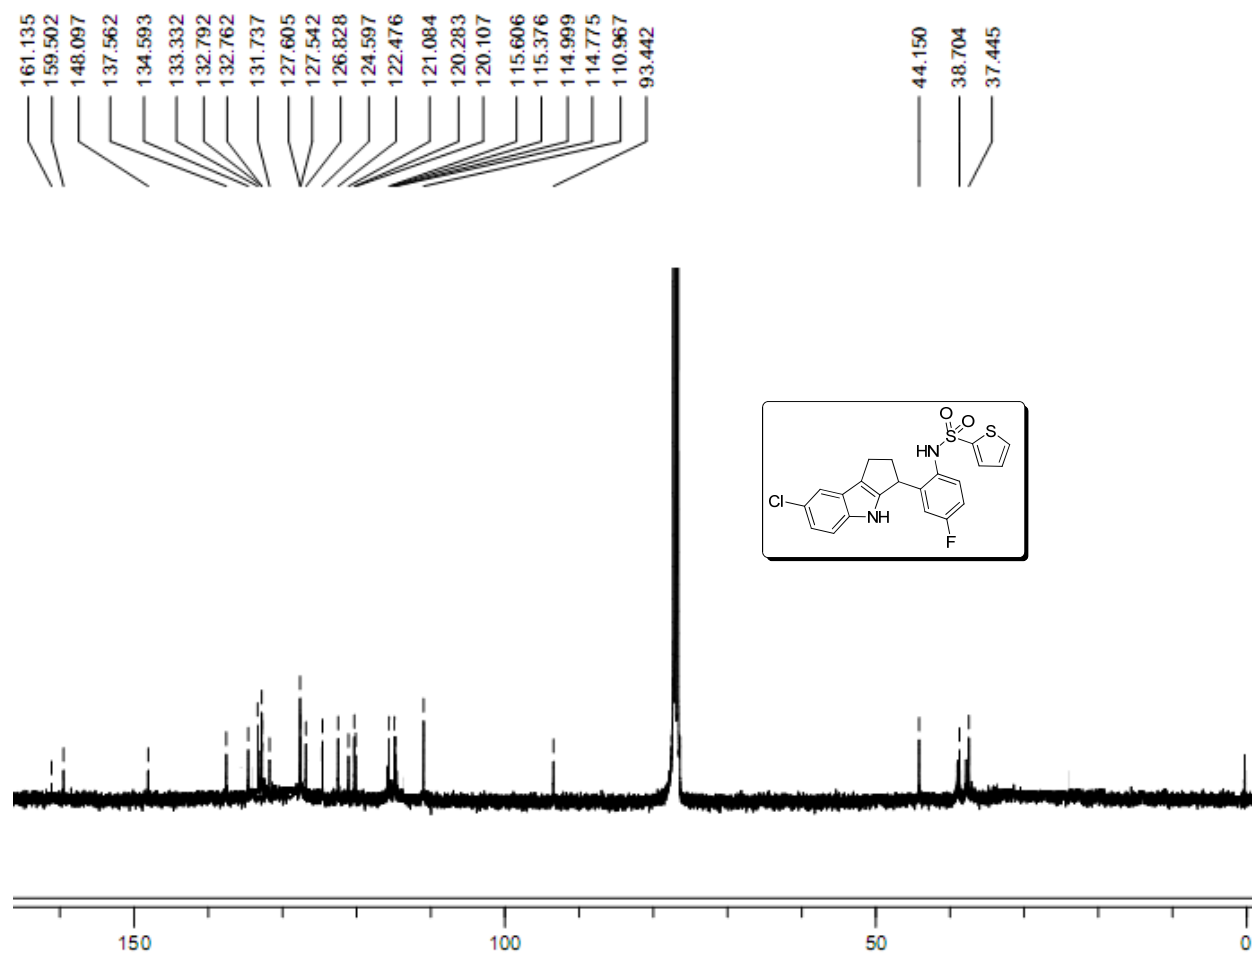

<sup>13</sup>C NMR spectrum (Varian, 100 MHz) of compound **4s** in CDCl<sub>3</sub>



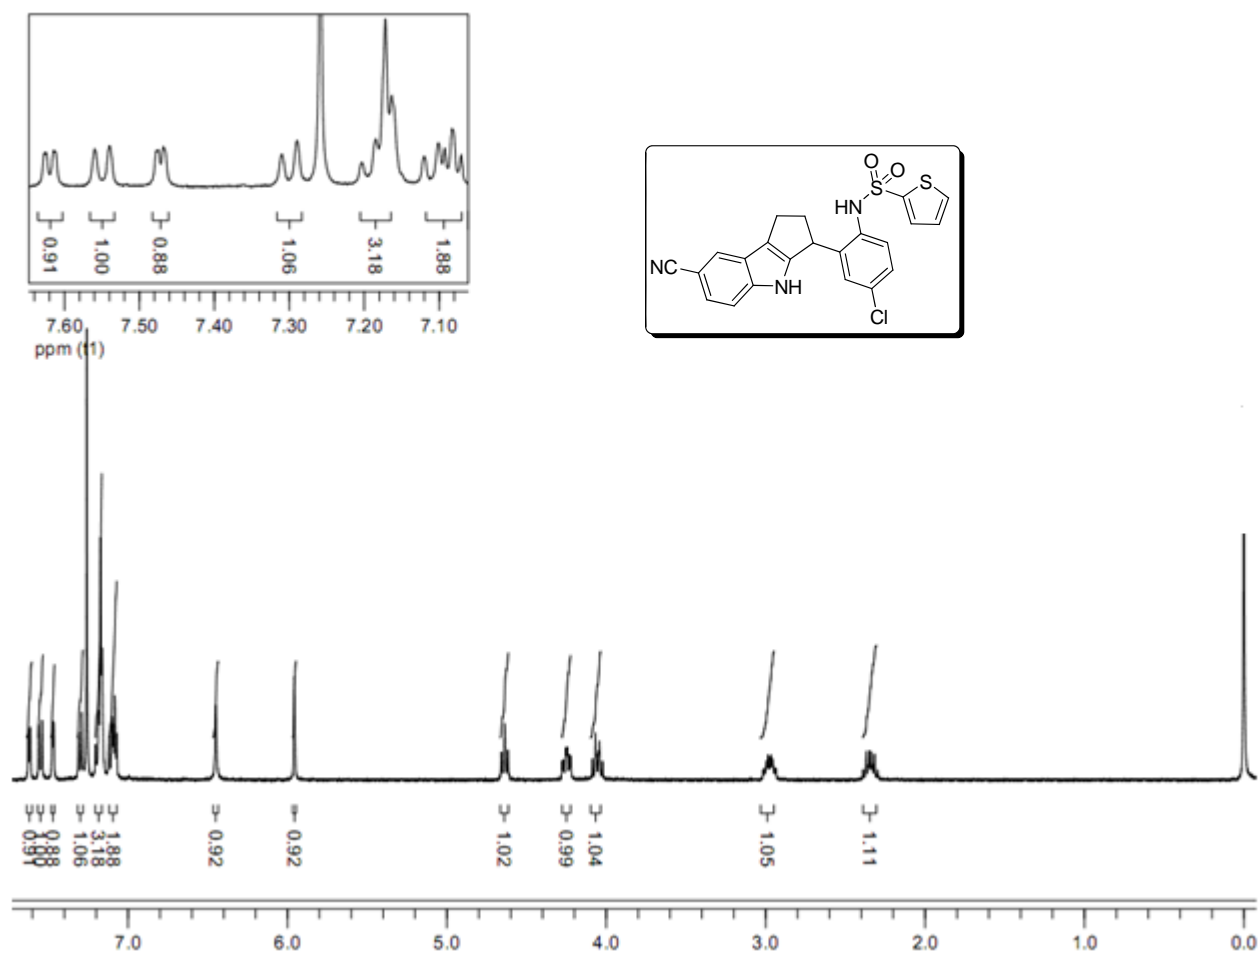

$^1\text{H}$  NMR (Varian, 400 MHz) spectrum of compound **4t** in  $\text{CDCl}_3$

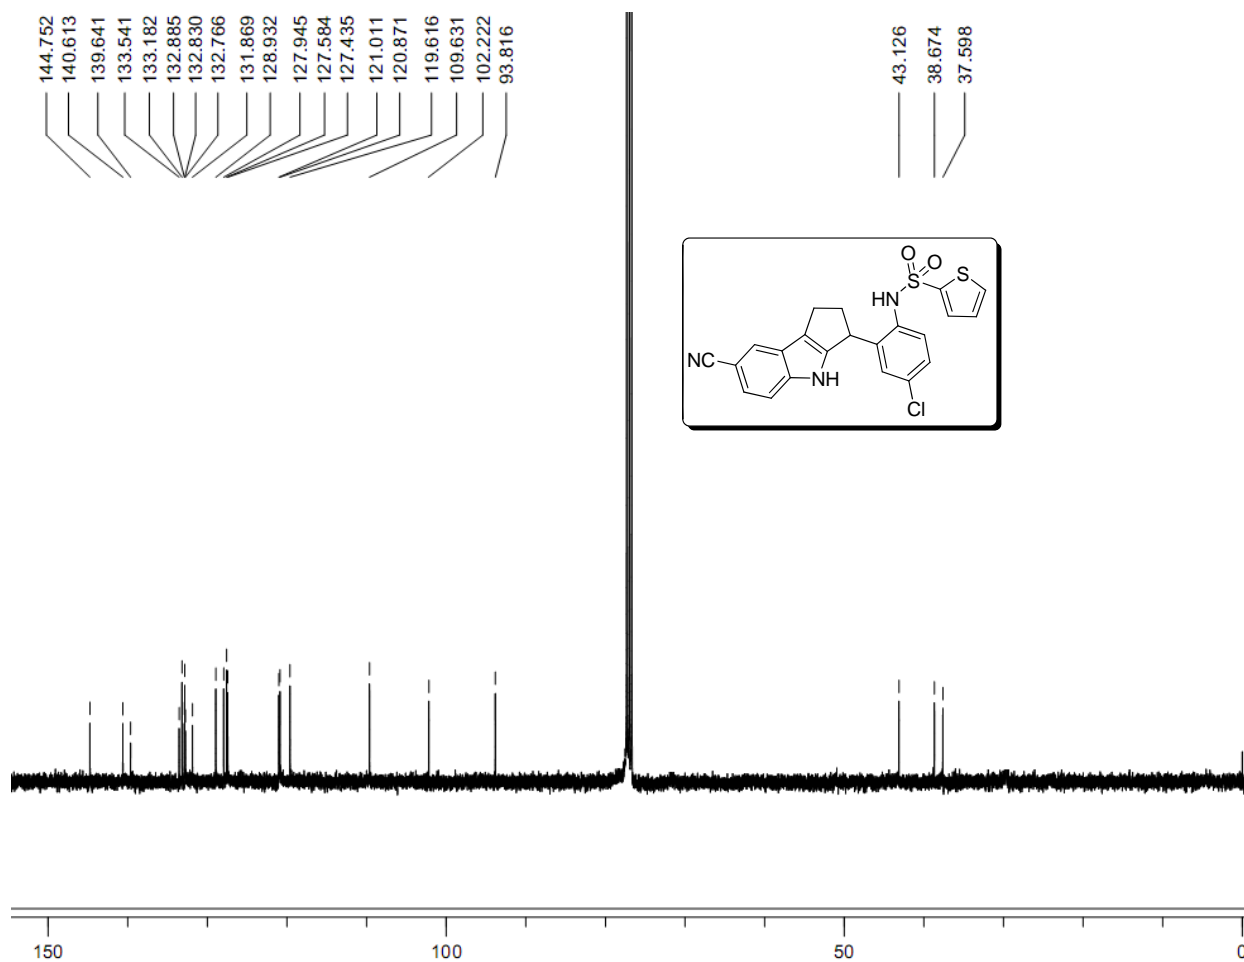

<sup>13</sup>C NMR spectrum (Varian, 100 MHz) of compound **4t** in CDCl<sub>3</sub>

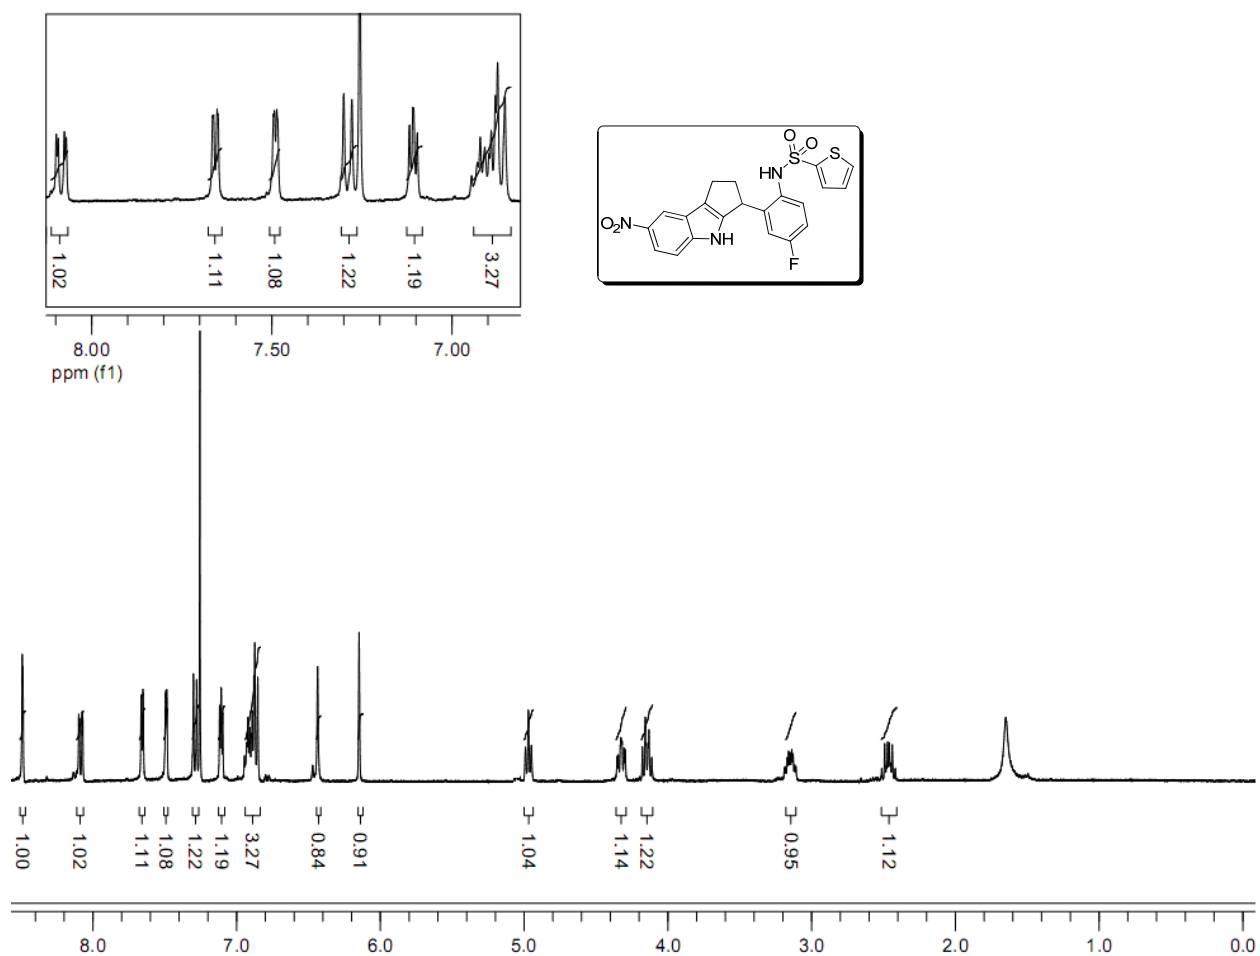

$^1\text{H}$  NMR (Varian, 400 MHz) spectrum of compound **4u** in  $\text{CDCl}_3$

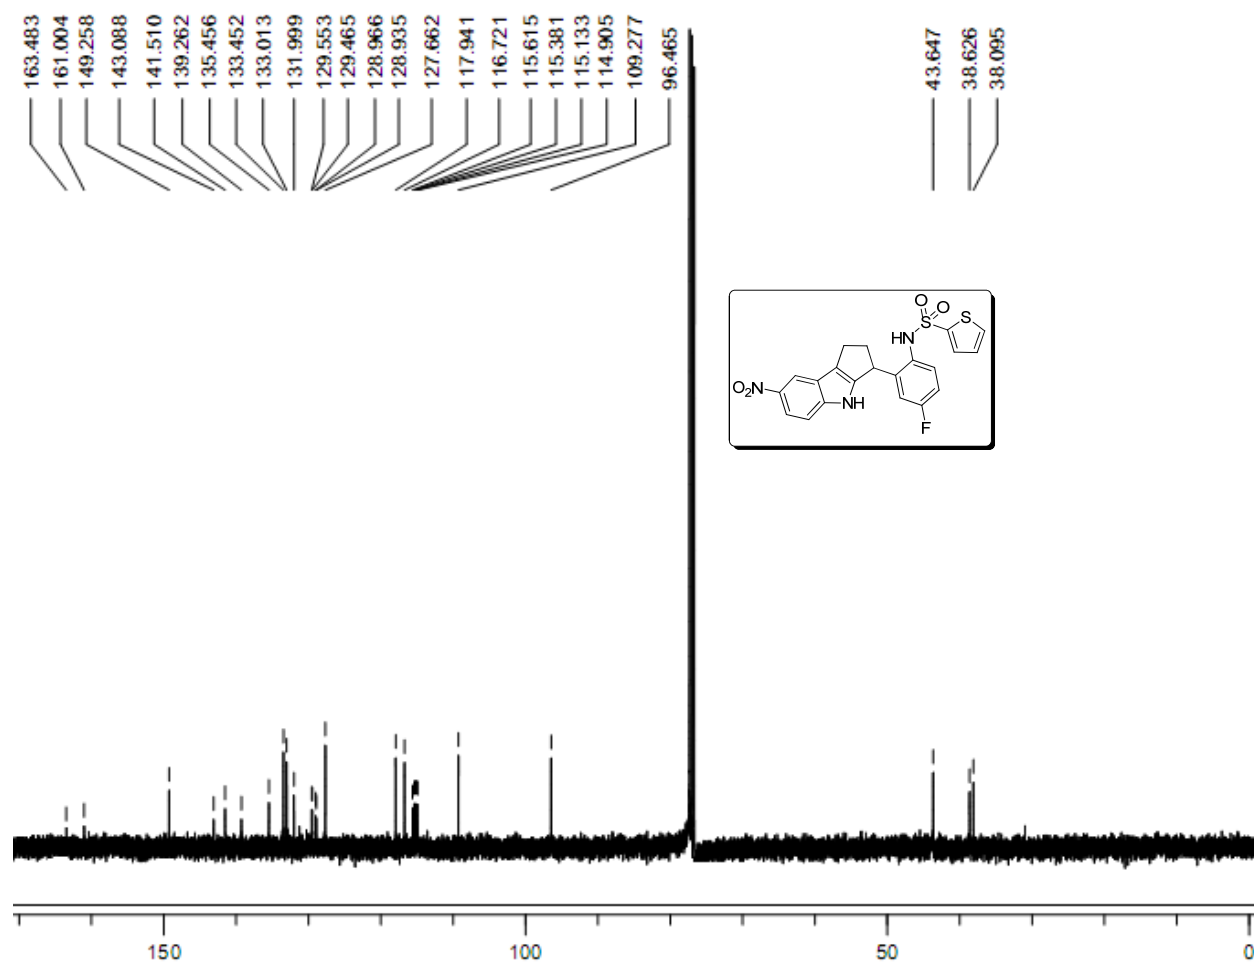

$^{13}\text{C}$  NMR spectrum (Varian, 100 MHz) of compound **4u** in  $\text{CDCl}_3$

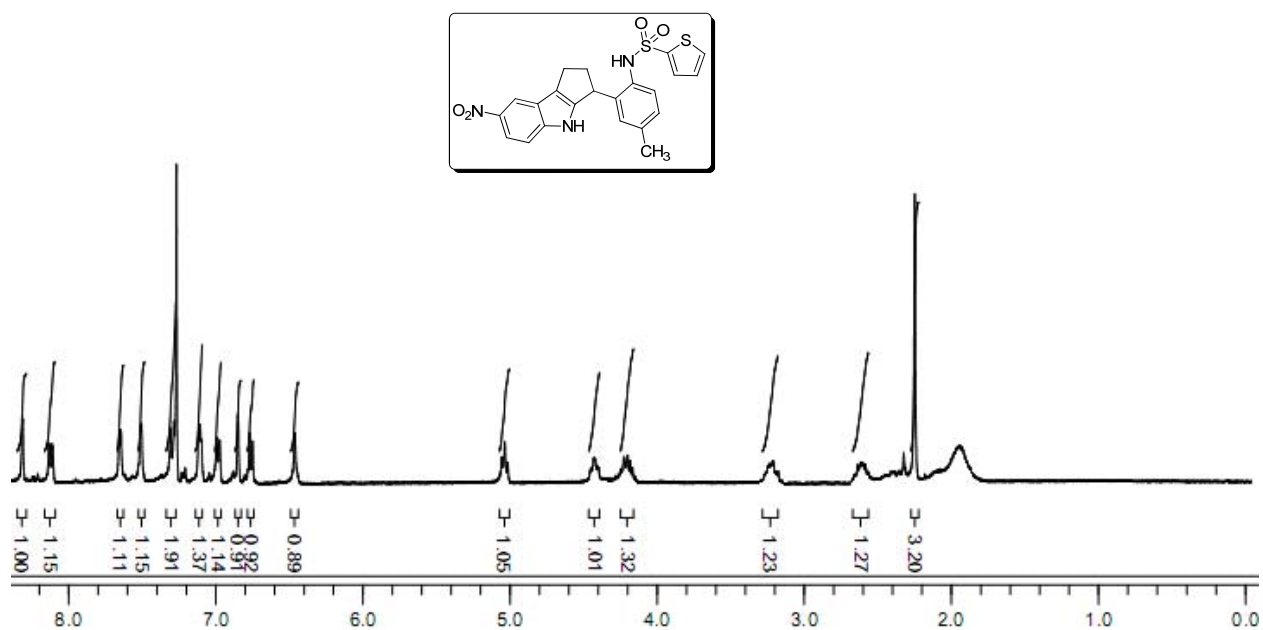

<sup>1</sup>H NMR (Varian, 400 MHz) spectrum of compound **4v** in CDCl<sub>3</sub>

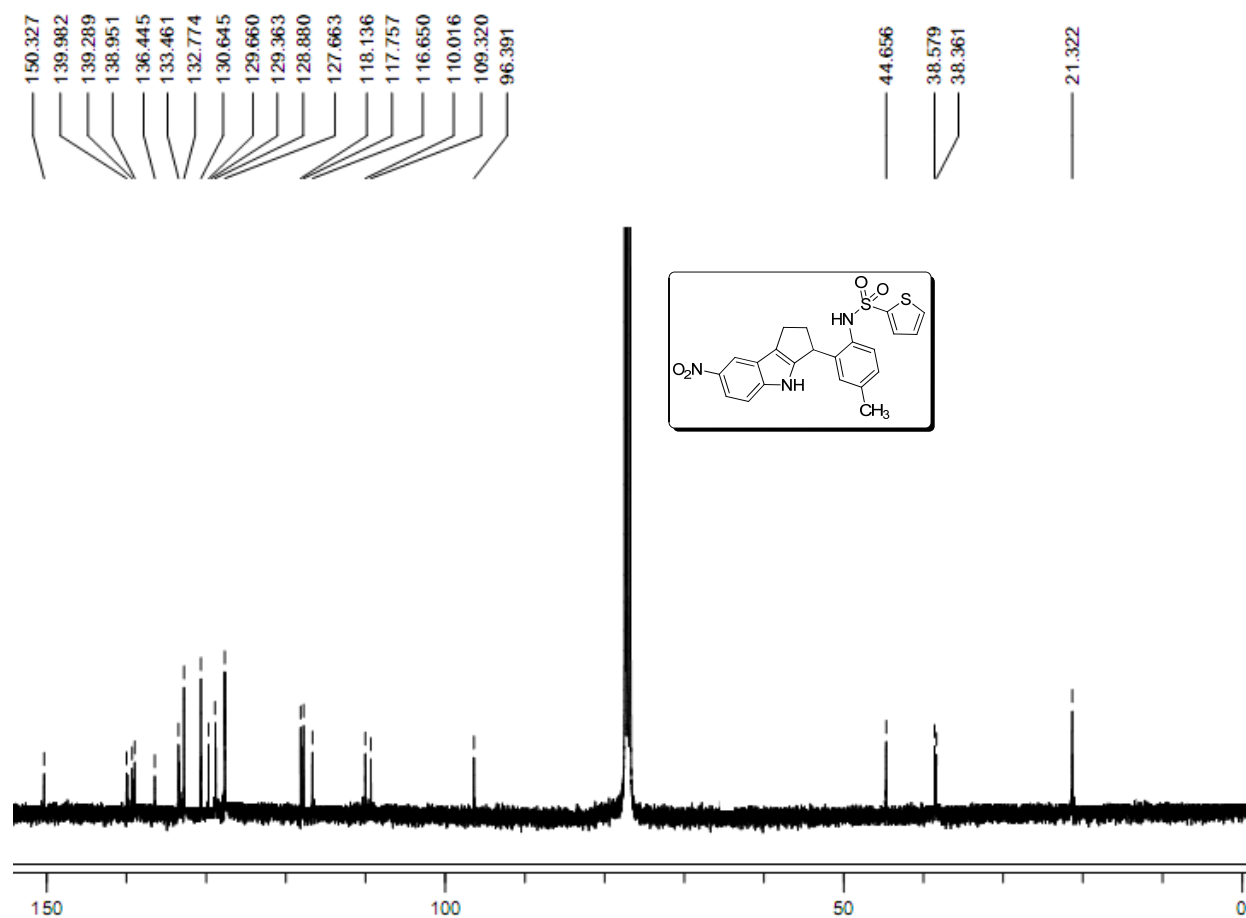

$^{13}\text{C}$  NMR spectrum (Varian, 100 MHz) of compound **4v** in  $\text{CDCl}_3$

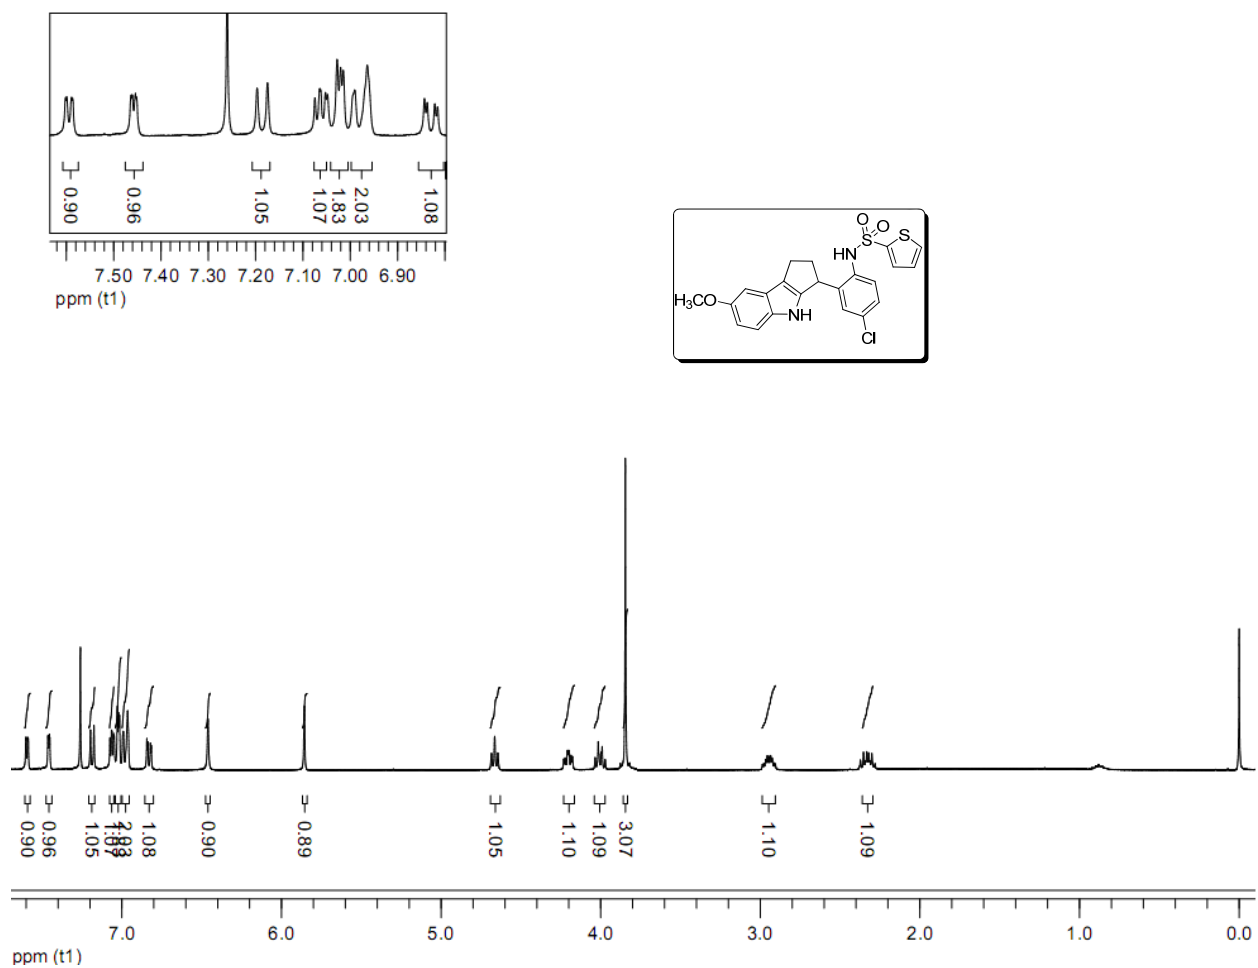

$^1\text{H}$  NMR (Varian, 400 MHz) spectrum of compound **4w** in  $\text{CDCl}_3$

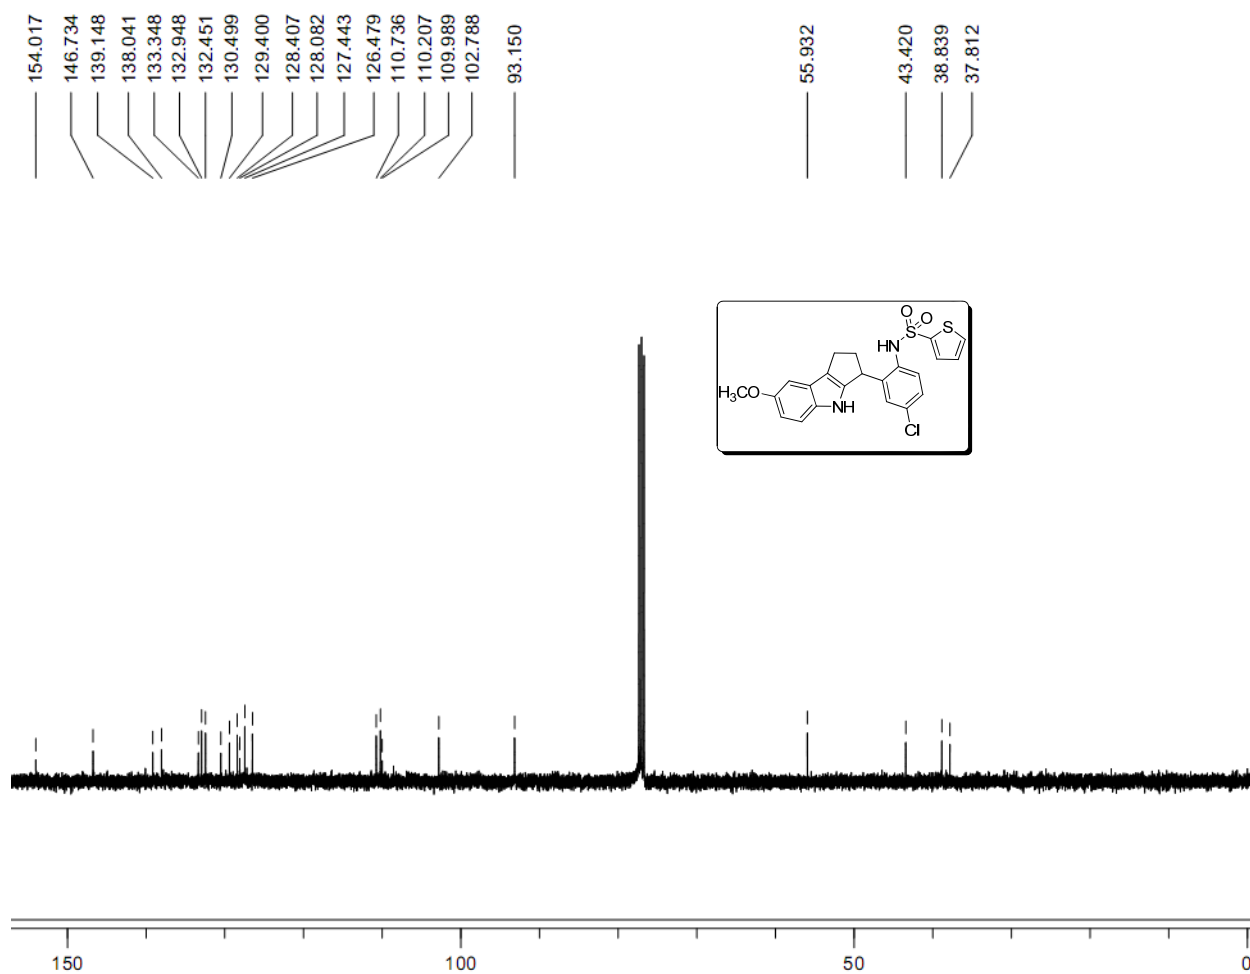

<sup>13</sup>C NMR spectrum (Varian, 100 MHz) of compound **4w** in CDCl<sub>3</sub>



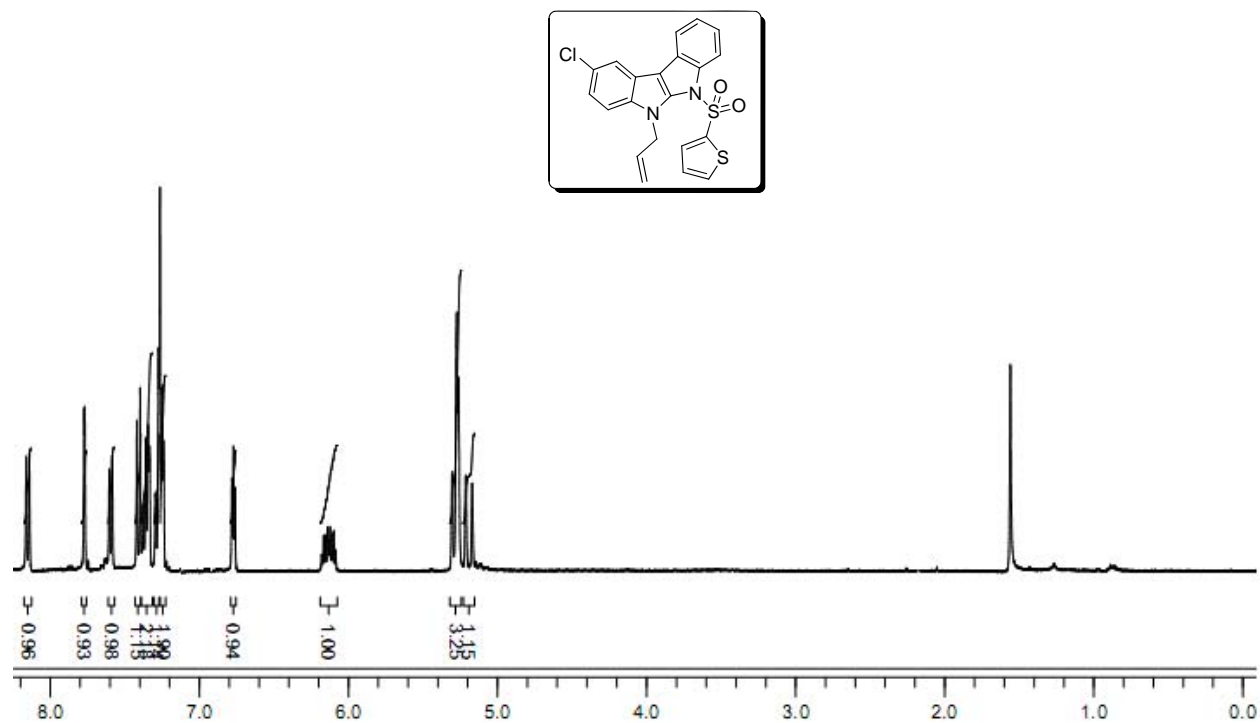

$^1\text{H}$  NMR (Varian, 400 MHz) spectrum of compound **5** in  $\text{CDCl}_3$

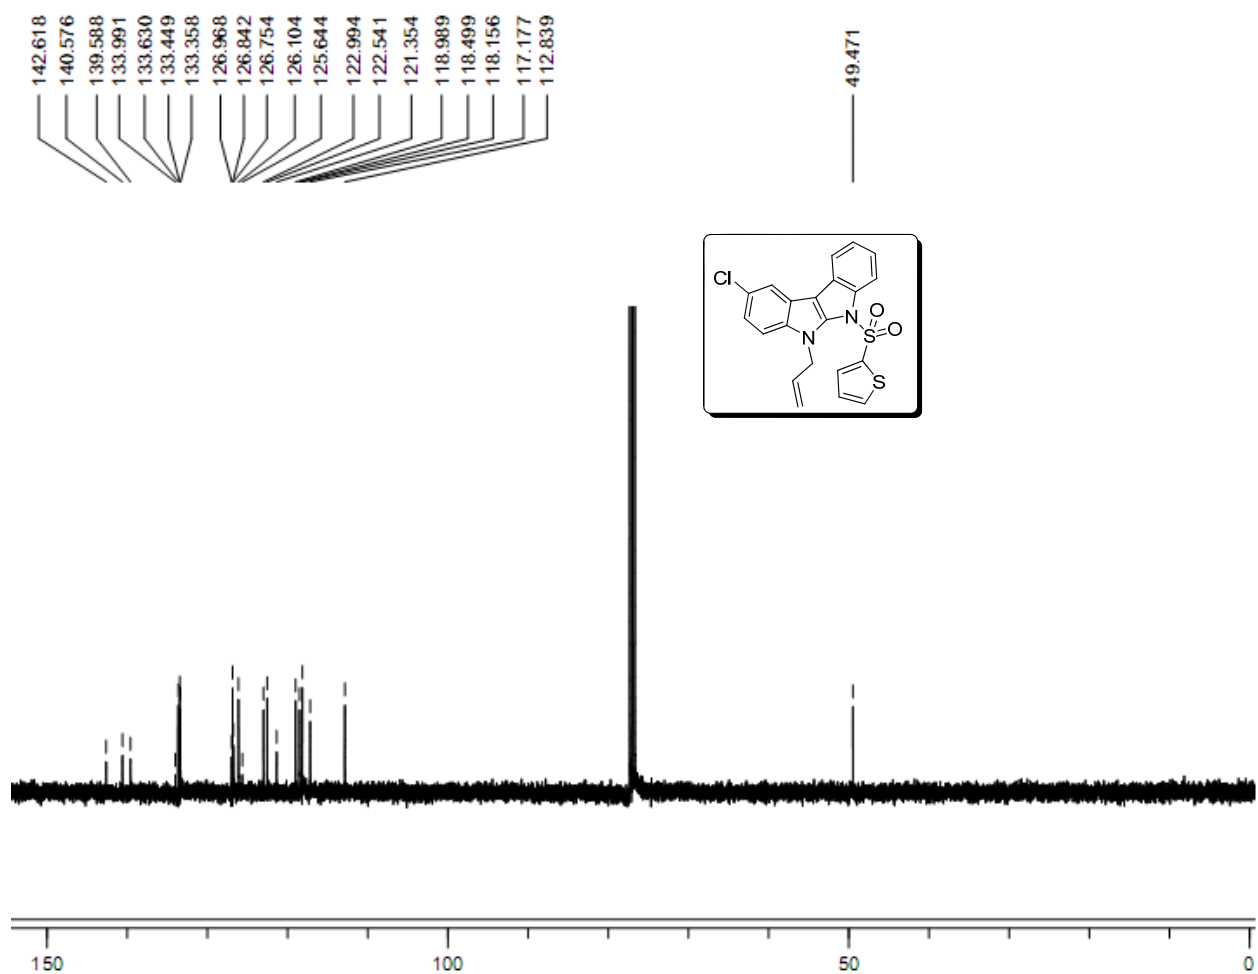

<sup>13</sup>C NMR spectrum (Varian, 100 MHz) of compound **5** in CDCl<sub>3</sub>

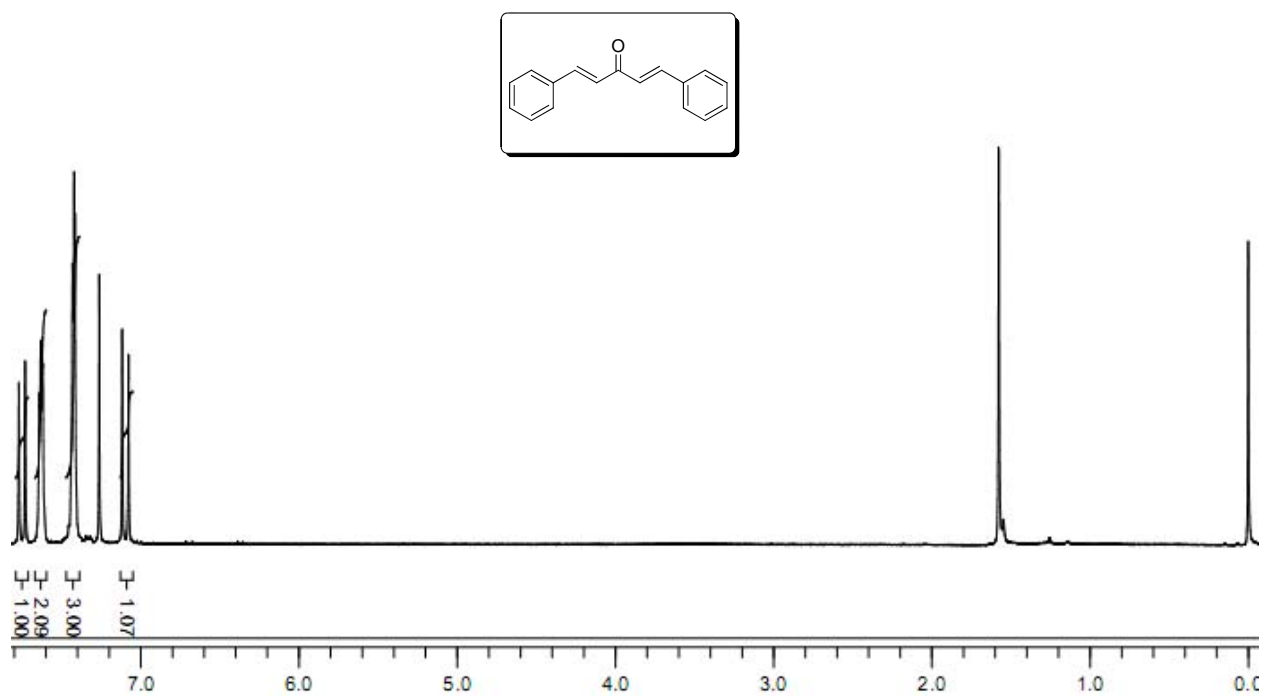

<sup>1</sup>H NMR (Varian, 400 MHz) spectrum of compound **L** in CDCl<sub>3</sub>

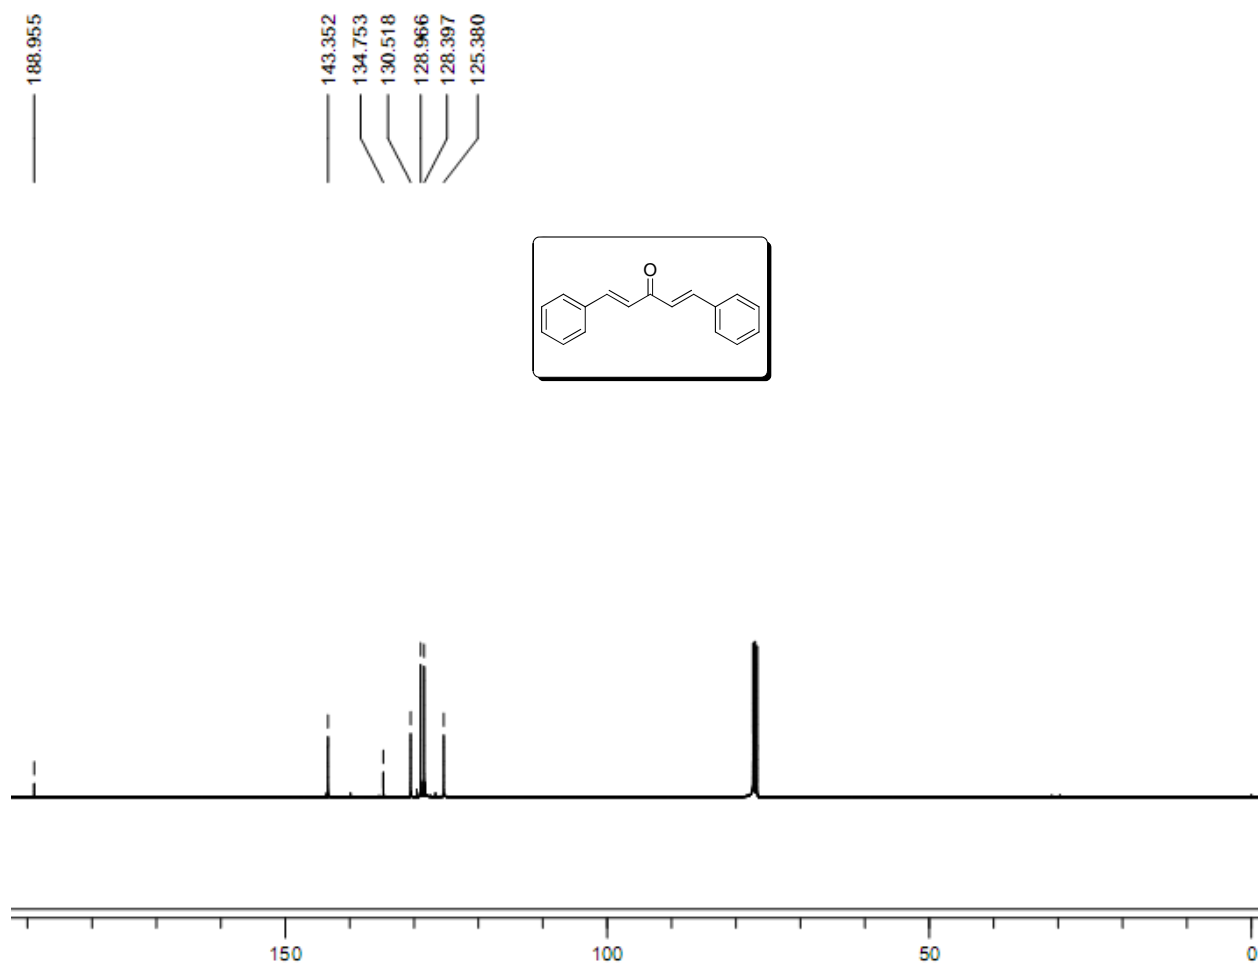

$^{13}\text{C}$  NMR spectrum (Varian, 100 MHz) of compound **L** in  $\text{CDCl}_3$

Compound **6**

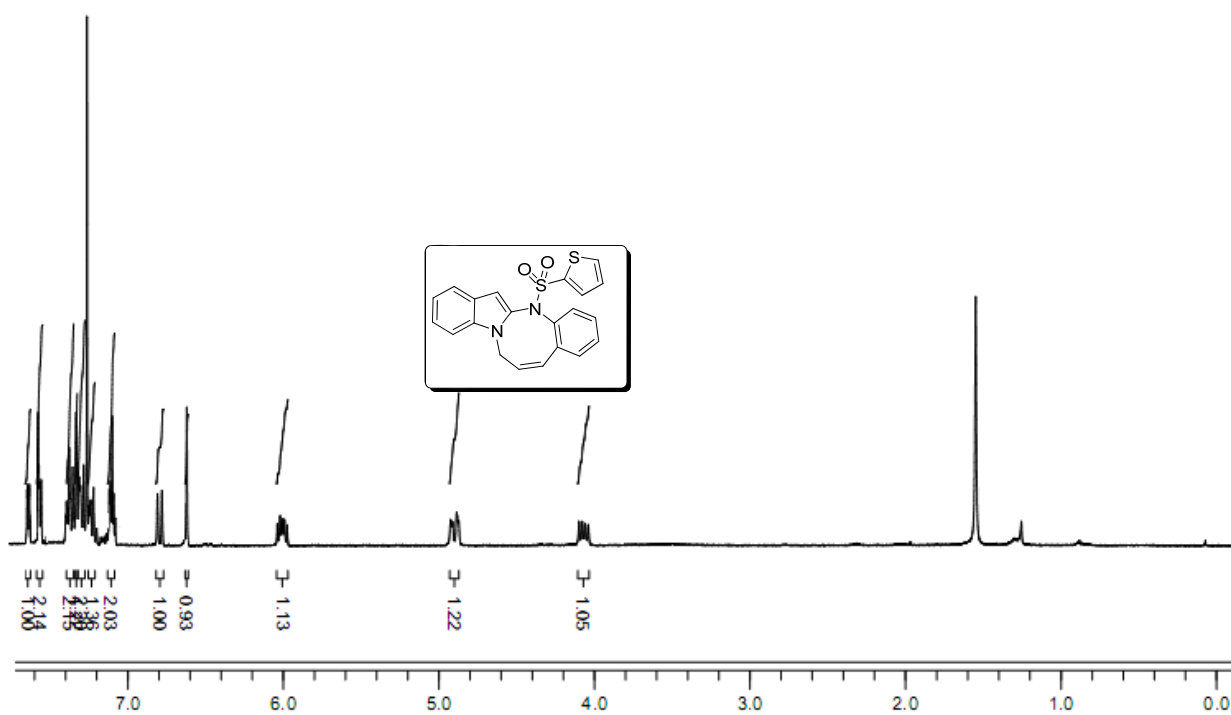

$^1\text{H}$  NMR (Varian, 400 MHz) spectrum of compound **6** in  $\text{CDCl}_3$

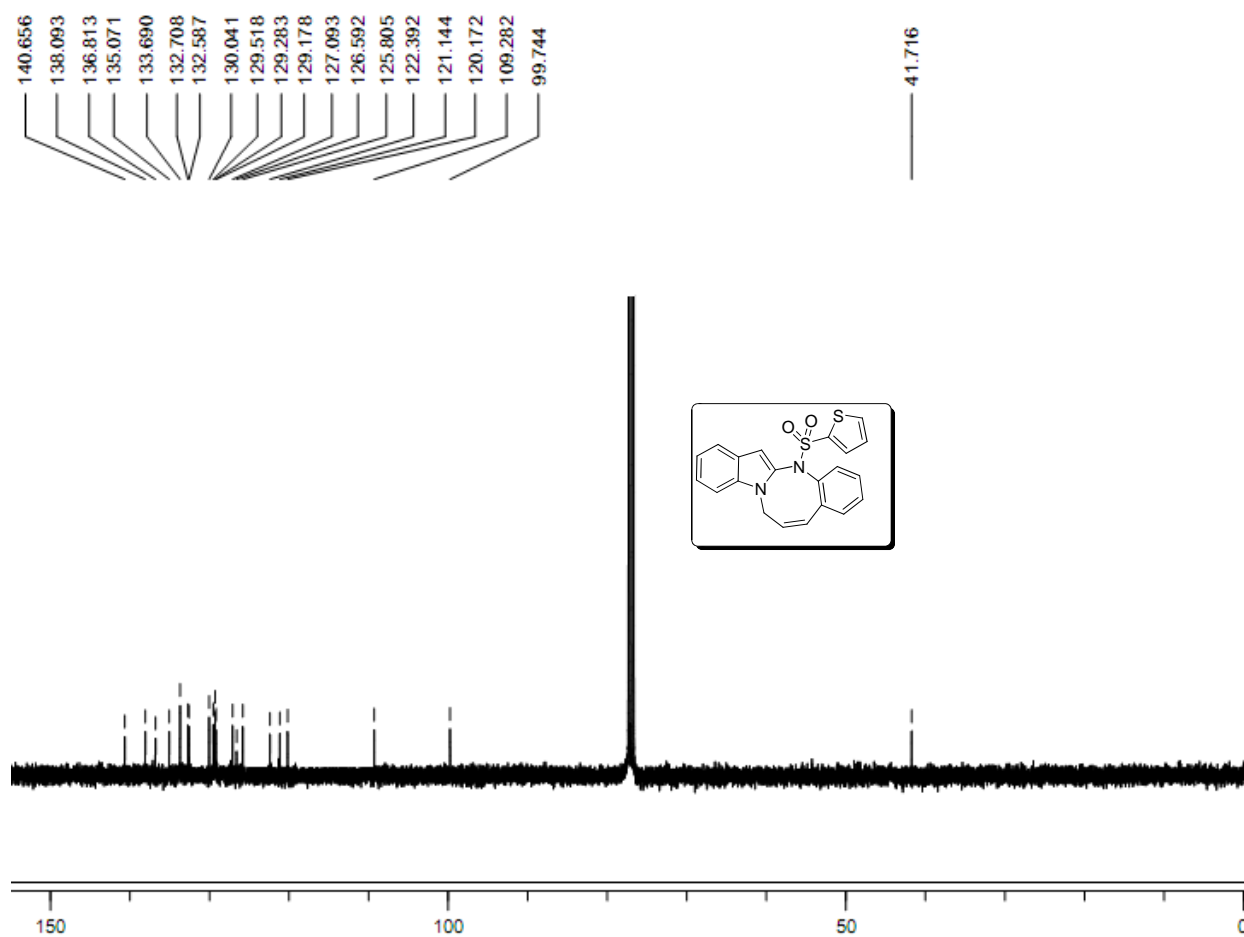

<sup>13</sup>C NMR spectrum (Varian, 100 MHz) of compound **6** in CDCl<sub>3</sub>

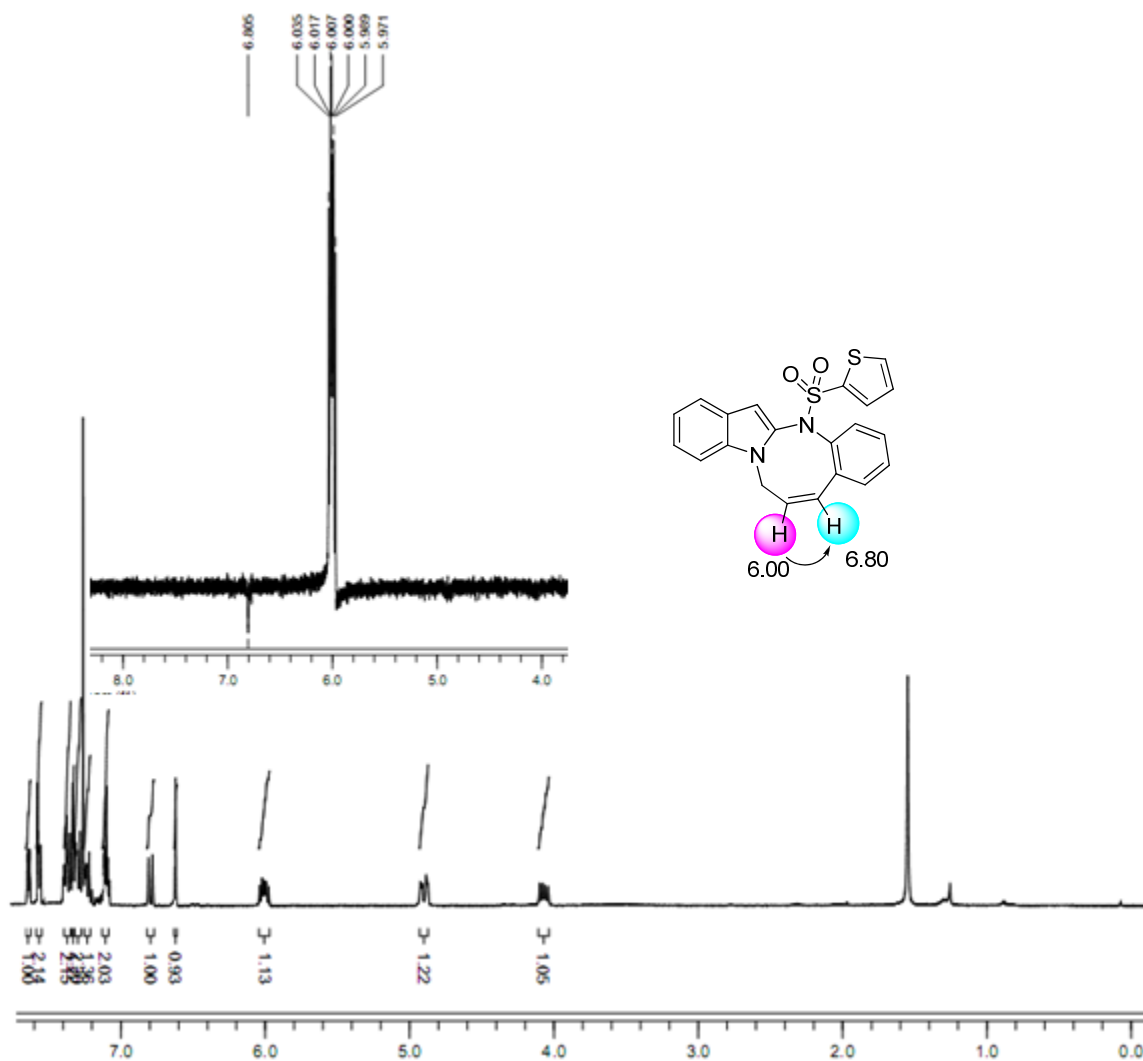

$^1\text{H}$  NMR and 1D NOE (Varian, 400 MHz) spectrum of compound **6** in  $\text{CDCl}_3$

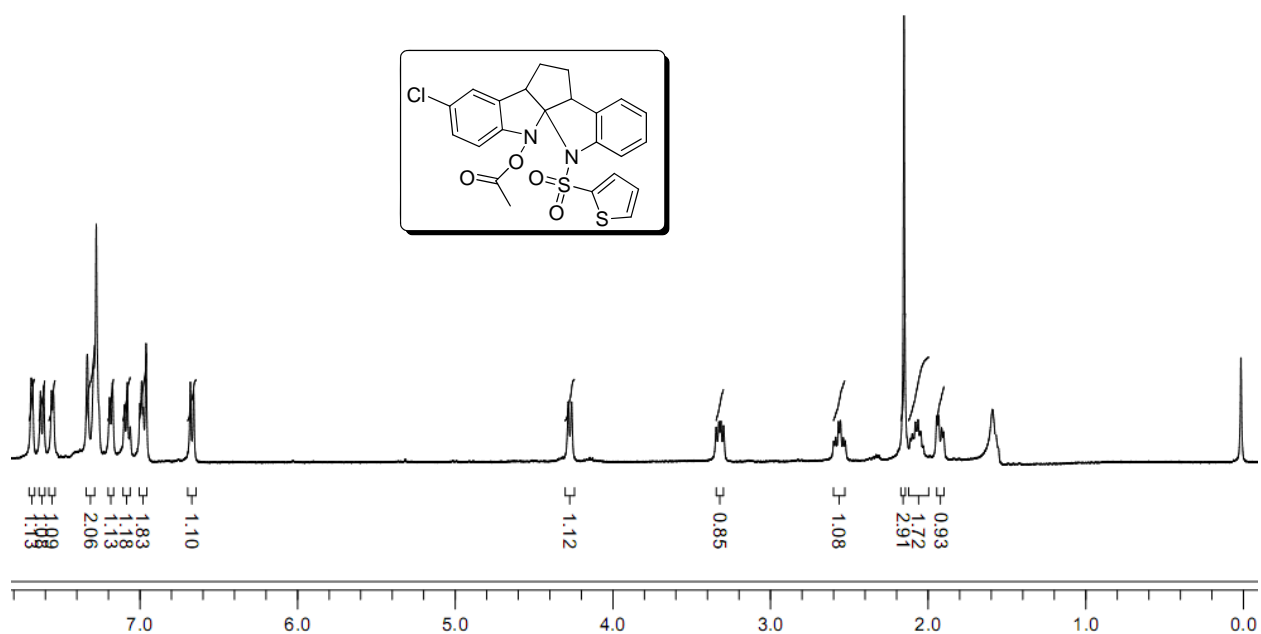

<sup>1</sup>H NMR (Varian, 400 MHz) spectrum of compound 7 in CDCl<sub>3</sub>



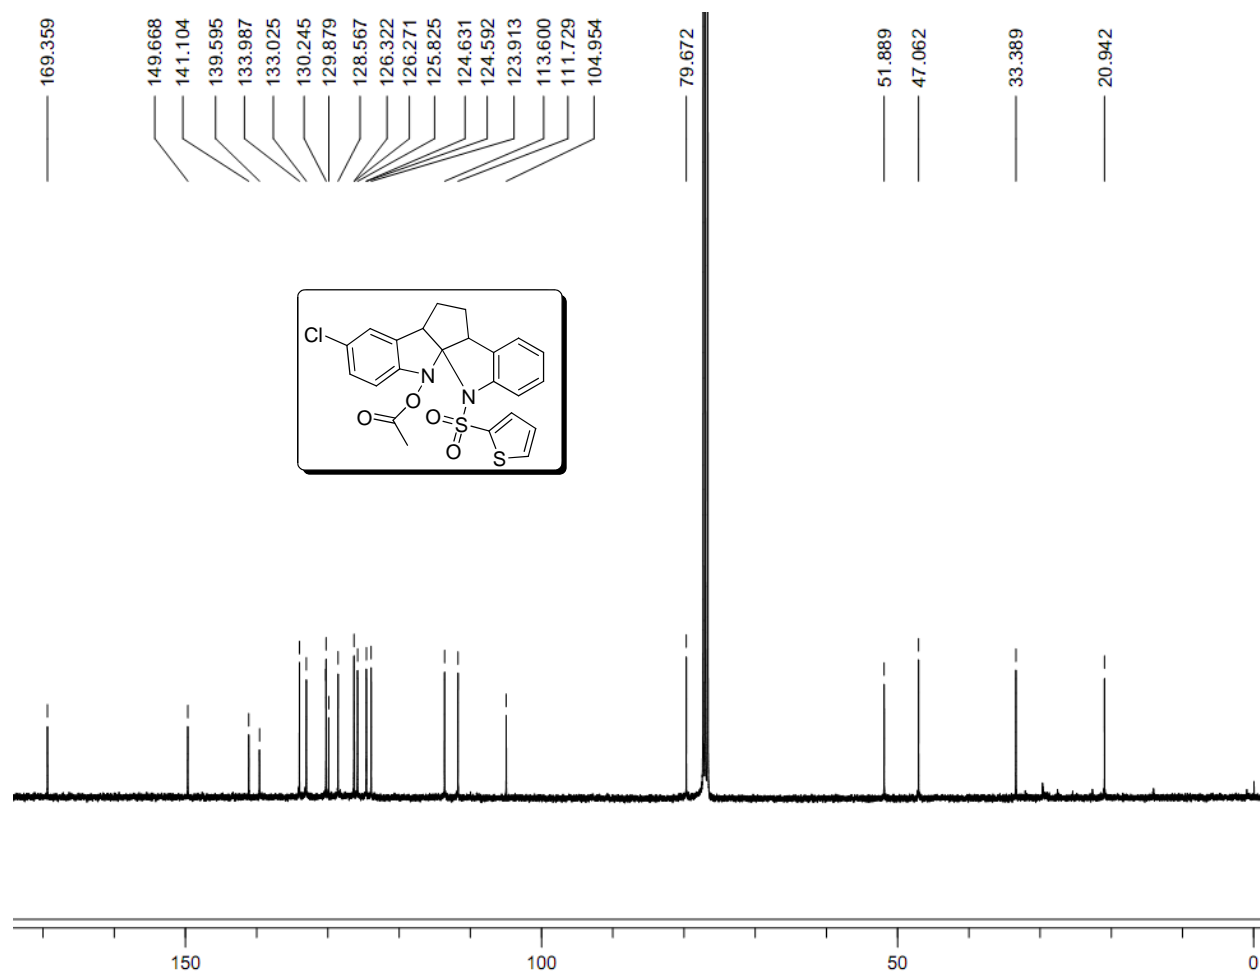

<sup>13</sup>C NMR spectrum (Varian, 100 MHz) of compound 7 in CDCl<sub>3</sub>
